# Supplementary material for: Lactonase Specificity Is Key to Quorum Quenching in Pseudomonas aeruginosa
Source: Front Microbiol. 2020 Apr 24;11:762. doi: 10.3389/fmicb.2020.00762 (PMC7193897; doi:10.3389/fmicb.2020.00762)
Supplement: Supplementary file 1 [file Data_Sheet_1.XLSX]

## Sheet: All detected proteins
					Normalized abundance
					5A8								Ssopox W263I								GcL								Mix
Accession	Peptide count	Unique peptides	Confidence score	Description	SsoPox 5A8 1 (Inactive) Injection1	SsoPox 5A8 1 (Inactive) Injection2	SsoPox 5A8 2 (Inactive) Injection1	SsoPox 5A8 2 (Inactive) Injection2	SsoPox 5A8 3 (Inactive) Injection1	SsoPox 5A8 3 (Inactive) Injection2	SsoPox 5A8 4 (Inactive) Injection1	SsoPox 5A8 4 (Inactive) Injection2	SsoPox W263I 1 Injection1	SsoPox W263I 1 Injection2	SsoPox W263I 2 Injection1	SsoPox W263I 2 Injection2	SsoPox W263I 3 Injection1	SsoPox W263I 3 Injection2	SsoPox W263I 4 Injection1	SsoPox W263I 4 Injection2	GcL 1 Injection1	GcL 1 Injection2	GcL 2 Injection1	GcL 2 Injection2	GcL 3 Injection1	GcL 3 Injection2	GcL 4 Injection1	GcL 4 Injection2	SsoPox W263I + GcL 1 Injection1	SsoPox W263I + GcL 1 Injection2	SsoPox W263I + GcL 2 Injection1	SsoPox W263I + GcL 2 Injection2	SsoPox W263I + GcL 3 Injection1	SsoPox W263I + GcL 3 Injection2	SsoPox W263I + GcL 4 Injection1	SsoPox W263I + GcL 4 Injection2
A0A0H2ZE61	1	1	5.6047	Putativ isomerase OS=Pseudomonas aeruginosa (strain UCBPP-PA14) GN=PA14_20960 PE=4 SV=1	1404.85	819.315	178.294	36.7672	158.539	319.014	1374.42	1604.39	0	0	0	0	0	0	0	0	0	0	0	0	0	0	22.4468	0	0	0	0	0	0	0	0	0
A0A0H2ZK55	3	2	25.0498	Putative hemolysin OS=Pseudomonas aeruginosa (strain UCBPP-PA14) GN=PA14_01490 PE=4 SV=1	31454.1	43092.2	52366.3	43111.2	39440.8	39951.6	24218.2	28451.4	19.0838	9.99955	98.6634	66.3834	9.85308	43.2367	37.4582	30.3087	2484.73	3100.04	6062.81	4276.18	4851.69	4609.51	3882.73	4279.71	76.0541	26.3913	27.0193	19.0703	0	0	20.8145	18.0875
Q02U62	5	2	25.886	Dihydroxy-acid dehydratase OS=Pseudomonas aeruginosa (strain UCBPP-PA14) GN=ilvD PE=3 SV=1	14.7889	7.90739	0	0	0	0	0	0	273.337	255.584	16.9359	25.9803	254.061	152.424	451.693	250.828	12165.1	14845.8	0	0	117.708	54.7827	0	0	68.907	48.5207	117.505	29.964	64.0376	32.5648	515.363	269.533
A0A0H2ZHK5	10	1	58.0617	Outer membrane protein assembly factor BamD OS=Pseudomonas aeruginosa (strain UCBPP-PA14) GN=comL PE=3 SV=1	0	0	0	0	0	0	3.66314	0	269.851	178.919	388.208	251.729	239.687	141.771	289.878	200.463	4.94817	17.7969	26.7133	0	0	0	0	0	100.945	350.576	292.751	346.867	14.1264	0	0	0
A0A0H2ZEZ6	6	1	38.8195	Iron-sulfur cluster assembly scaffold protein IscU OS=Pseudomonas aeruginosa (strain UCBPP-PA14) GN=iscU PE=3 SV=1	3073.96	2400.47	572.702	675.586	3767.99	3218.51	815.907	626.701	5.07453	0	15.9992	15.0245	26.3367	7.62993	0	22.9273	35.2177	8.03572	11.3405	48.7469	0	0	202.503	270.831	1.38929	0	16.7507	19.2302	9.16241	0	4.28543	14.5479
A0A0H2ZB54	2	1	10.4598	Uncharacterized protein OS=Pseudomonas aeruginosa (strain UCBPP-PA14) GN=PA14_34070 PE=4 SV=1	0	0	0	0	0	26.2586	38.2869	33.4183	1241.86	1818.34	1752.68	1387.68	3453.47	2569.84	2515.72	1922.33	2449.84	850.004	236.89	0	569.179	41.8041	88.8773	17.8987	450.369	216.275	880.207	200.886	15.0825	0	10.6235	0
A0A0H2ZCK1	4	1	23.0538	Periplasmic tail-specific protease OS=Pseudomonas aeruginosa (strain UCBPP-PA14) GN=tsp PE=3 SV=1	182.953	114.371	23.9629	65.3949	141.706	172.764	354.239	338.484	23.2726	8.80591	16.7908	30.3994	116.78	81.4789	104.07	40.1898	12.1247	0	0	0	0	0	0	0	73.8068	67.7363	194.796	58.9069	30.1632	22.7421	98.0386	29.8448
A0A0H2ZG51	4	1	18.7874	Probable phenazine-specific methyltransferase OS=Pseudomonas aeruginosa (strain UCBPP-PA14) GN=phzM PE=4 SV=1	922.763	1873.1	1631.49	1357.61	0	1024.19	2656.59	2228.63	0	0	15.4249	15.7673	59.3378	31.1648	21.4593	8.19251	241.96	231.422	269.508	321.239	608.594	464.616	254.217	84.4395	24.271	25.0524	55.5737	26.8044	0	0	6.22768	1.67774
Q02L47;A0A0H2ZGA6	18	12	129.666	Phenazine biosynthesis protein PhzB 2 OS=Pseudomonas aeruginosa (strain UCBPP-PA14) GN=phzB2 PE=1 SV=1	709419	903957	222449	83099.1	272450	185790	448757	406875	7201.55	6787.64	6257.31	6382.57	6688.86	5162.39	6746.82	5734.75	12506.6	11222	12562.7	12311.3	15137.6	10310.3	24694.7	19283.2	6774.49	6291.93	5892.43	5990.46	6279.17	5722.61	6741.73	5373.35
A0A0H2Z7X3	2	1	9.3866	Putative transcriptional regulator OS=Pseudomonas aeruginosa (strain UCBPP-PA14) GN=PA14_48770 PE=4 SV=1	9556.84	12229.5	16334.7	16699.3	10234.9	11444.4	6116.49	6843.37	236.875	291.86	407.825	432.146	164.706	159.286	187.267	174.194	426.934	591.39	725.046	589.221	527.108	702.742	685.889	902.594	550.848	490.702	469.247	490.388	117.163	70.3671	519.81	326.367
A0A0H2ZIN4	7	1	32.7371	dTDP-glucose 4,6-dehydratase OS=Pseudomonas aeruginosa (strain UCBPP-PA14) GN=rmlB PE=3 SV=1	844.23	736.749	1546.59	1320.18	389.517	233.49	347.367	468.775	0	0	100.989	101.538	4.30389	10.4254	4.28604	5.66851	100.127	137.91	1106.68	1126.58	0	0	3390.17	3898.05	25.6021	43.0537	2.60543	9.9088	476.331	379.168	0	7.39722
A0A0H2Z6F6	2	1	11.6489	Quinolone signal response protein OS=Pseudomonas aeruginosa (strain UCBPP-PA14) GN=pqsE PE=4 SV=1	57.9256	84.2075	103.556	12.5908	600.774	595.771	236.44	203.01	94.4111	78.1905	101.876	68.9501	117.17	76.2648	150.706	83.5216	3011.2	3624.74	4210.25	3236.05	6692.75	7688.52	2254.2	1548.95	105.942	71.1783	262.067	199.91	15.4174	8.72131	190.79	121.362
Q02FQ1	5	2	28.39	L-lactate dehydrogenase OS=Pseudomonas aeruginosa (strain UCBPP-PA14) GN=lldD PE=3 SV=1	32.9516	9.29029	41.041	34.064	39.961	117.005	256.371	280.026	5053.12	4796.69	3139.92	3907.18	2934.22	3403.9	4580.05	4424.65	779.596	674.746	276.965	180.952	1128.1	1508.45	49.252	49.2111	5047.79	3937.68	3401.48	3920.63	1179.42	1587.32	5226.19	5572.08
A0A0H2ZE82	9	6	50.2317	Putative lyase OS=Pseudomonas aeruginosa (strain UCBPP-PA14) GN=PA14_18850 PE=4 SV=1	15315.5	15210.1	24105.3	24818.8	19639.7	20110.7	17713.3	17318.7	319.496	534.236	933.276	1059.79	924.692	900.48	941.866	936.251	513.462	618.685	597.591	507.777	412.44	371.82	532.734	577.683	959.452	670.6	1293.67	1041.5	430.597	458.652	940.663	632.335
A0A0H2ZEG1	17	5	132.791	Uncharacterized protein OS=Pseudomonas aeruginosa (strain UCBPP-PA14) GN=PA14_18820 PE=4 SV=1	120313	105360	180603	184109	115710	106881	138220	128321	3717.47	3921.04	4397.55	3618.82	3408.46	3391.92	4638.43	4656.03	4509.23	5262.05	4875.64	4133.3	3261.54	4127.86	4834.53	3426.1	2988.57	4021.87	6829.26	4907.25	6059.53	5613.09	4133.51	3095.36
A0A0H2ZEK9	1	1	6.3893	Adenylosuccinate lyase OS=Pseudomonas aeruginosa (strain UCBPP-PA14) GN=PA14_18830 PE=3 SV=1	1338.42	872.264	1936.31	1114.79	1213.25	1747.75	3328.16	2525.4	70.6444	10.9874	73.0751	33.8362	105.846	110.727	4.65922	29.7686	151.332	117.336	891.261	159.603	73.5917	159.198	39.5718	0	107.799	59.0066	105.419	27.8916	84.001	167.683	188.88	86.0258
A0A0H2ZEE8	5	2	36.578	Uncharacterized protein OS=Pseudomonas aeruginosa (strain UCBPP-PA14) GN=PA14_13010 PE=4 SV=1	0	0	14.0871	33.9063	242.36	238.956	164.197	78.2137	906.172	1264.48	310.09	268.109	1238.88	1299	424.181	431.349	59.1877	136.38	44.175	15.9365	0	10.56	12.6828	11.0986	596.026	540.143	2013.34	1968.77	342.396	297.245	570.404	799.82
Q02T64	4	1	18.5589	50S ribosomal protein L18 OS=Pseudomonas aeruginosa (strain UCBPP-PA14) GN=rplR PE=3 SV=1	28.3811	39.0863	0	0	300.591	217.276	78.6568	39.4853	1646.04	1622.63	629.234	549.11	1272.57	1369.6	927.089	1029.67	411.14	557.148	51.6454	53.8347	1572.37	2092.84	11.4338	0	1172.92	1080.43	2060.17	1425.05	863.599	965.694	2162.82	1328.96
A0A0H2ZJ40	3	1	25.1204	Uncharacterized protein OS=Pseudomonas aeruginosa (strain UCBPP-PA14) GN=PA14_70360 PE=4 SV=1	21302	29739.3	38420.1	57271.1	8358.65	8573.25	13387.6	12615.6	423.332	667.615	2830.16	2880.26	1953.69	1977.01	621.67	768.794	6067.36	8159.91	32820	33207.3	989.936	578.05	44939.8	51711.7	1571.51	1667.11	469.055	605.35	12607.8	13172.1	724.536	627.768
Q02KH4	4	2	21.939	Acireductone dioxygenase OS=Pseudomonas aeruginosa (strain UCBPP-PA14) GN=mtnD PE=3 SV=1	13001	11830.9	11977.1	12831.1	5641.61	5813.17	10964.1	14485.4	609.737	579.76	882.967	863.184	664.054	784.58	839.514	846.484	3807.18	3311.67	3596.97	2980.71	203.704	218.471	5081.13	6398.29	656.992	636.22	913.859	700.009	876.837	1234.72	259.032	318.669
A0A0H2ZF69;A0A0H2ZKU3	4	2	33.5786	Phenazine biosynthesis protein PhzD OS=Pseudomonas aeruginosa (strain UCBPP-PA14) GN=phzD1 PE=4 SV=1	58628.2	65091.4	93162.1	92024	85290.2	76072.5	46158.2	40189.2	3418.08	3652.43	5257.79	5258.91	6761.42	5893.44	4583.75	3792.93	8850.28	8454.55	12619.2	11638.3	7816.3	6436.24	13212.1	10322.1	4117.34	3287.64	4260.56	4061.8	8819.12	7503.09	4926.6	4105.75
A0A0H2ZHY6	6	4	33.228	Uncharacterized protein OS=Pseudomonas aeruginosa (strain UCBPP-PA14) GN=PA14_63780 PE=4 SV=1	267.634	482.636	216.414	67.7125	2164.84	1913.6	577.865	557.041	15567	14748.2	9076.86	7429.82	8875.38	8258.19	7019.7	6655.86	12239.6	13284.5	12613.1	10099.5	9128.73	6541.97	12179.3	11778.1	9720.93	9182.46	7203.51	6752.01	12145.2	10460.3	13531	10833.3
A0A0H2ZKW0	3	1	16.7966	Uncharacterized protein OS=Pseudomonas aeruginosa (strain UCBPP-PA14) GN=PA14_03350 PE=4 SV=1	0	0	0.737235	0	0	0	85.2316	17.5024	22.5578	9.0736	145.687	63.5091	135.152	30.781	148.791	50.5558	131.007	345.773	420.301	234.582	49.494	53.6472	90.8001	54.8369	145.24	196.104	19.6147	6.89599	95.5992	0	7.69226	0
A0A0H2ZDZ5	4	1	19.753	Uncharacterized protein OS=Pseudomonas aeruginosa (strain UCBPP-PA14) GN=PA14_21120 PE=4 SV=1	65.5956	9.16761	77.9562	17.7734	99.3635	149.2	452.619	464.354	19.1939	364.679	366.028	350.923	380.59	107.646	448.978	430.752	34.5003	25.1661	44.2835	31.7198	0	0	30.6723	47.1406	466.148	501.369	656.425	584.589	201.841	57.7613	230.99	0
A0A0H2ZHR0	12	4	66.4431	Putative hemolysin activation/secretion protein OS=Pseudomonas aeruginosa (strain UCBPP-PA14) GN=PA14_61190 PE=4 SV=1	12780.4	13584.9	24535.9	23497.1	14316.6	13283.9	10234.2	9494.45	1053.66	1139.18	1538.13	1429.76	1063.36	1215.44	1242.39	963.56	1537.41	2045.72	3319.27	3219.21	1019.33	1073.07	4125.17	4419.25	1300.06	1438.34	1245.94	1390.4	1723.39	2385.53	1342.43	1166.6
A0A0H2ZED1	6	2	58.123	Putative periplasmic metal-binding protein OS=Pseudomonas aeruginosa (strain UCBPP-PA14) GN=PA14_18070 PE=4 SV=1	5151.73	6141.12	5349.38	3335.19	1616.02	2059.41	6195.67	7371.82	328.868	345.328	368.106	304.176	635.243	520.04	373.777	281.856	315.737	254.613	355.601	407.749	459.903	487.445	542.653	345.154	118.436	211.64	434.995	377.771	729.703	497.245	470.425	292.078
A0A0H2ZBE0	3	1	23.3584	Uncharacterized protein OS=Pseudomonas aeruginosa (strain UCBPP-PA14) GN=PA14_34030 PE=4 SV=1	424.359	362.153	305.042	32.8502	699.087	303.174	310.58	342.763	2.07855	0	43.8164	41.1716	61.1711	40.7441	37.4559	38.8523	339.879	314.062	308.72	338.975	603.063	555.945	85.8135	515.201	77.6867	54.1939	32.766	40.2923	14.9489	43.7817	46.4715	27.7578
A0A0H2ZHA3	1	1	5.4418	Uncharacterized protein OS=Pseudomonas aeruginosa (strain UCBPP-PA14) GN=PA14_59990 PE=4 SV=1	297.698	1237.1	550.299	686.494	468.893	459.137	1867.98	2198.59	714.835	1467.85	703.3	903.45	300.557	444.799	1676.35	1833.63	338.198	233.974	135.081	293.149	74.1374	80.0536	108.739	120.897	1655.91	3819.05	2043.35	2753.74	412.719	451.607	1743.7	2310.34
A0A0H2ZHA1	4	2	19.6117	Chemotaxis protein MotB OS=Pseudomonas aeruginosa (strain UCBPP-PA14) GN=motB PE=4 SV=1	62.8524	0	77.4969	0	88.6779	122.264	304.012	379.911	1118.16	1202.62	879.591	932.858	1130.87	1385.67	1910	1424.31	208.019	182.956	11.6183	14.454	117.585	313.06	40.1309	101.227	1412.47	1577.72	1699.6	1763.52	123.198	188.436	1674.1	1712.69
A0A0H2Z7Y2	10	3	55.0099	Uncharacterized protein OS=Pseudomonas aeruginosa (strain UCBPP-PA14) GN=PA14_48590 PE=4 SV=1	28529.5	31410.9	37596.5	36812.6	35754.4	35030.7	20436.6	20945.9	3589.08	3597.02	3118.04	3129.82	2608.67	2929.25	2905.72	2716.63	3211.78	3475.98	3744.42	2729.12	3744.75	4176.46	2795.66	3134.03	3399.48	3212.83	3130.81	3097.79	2615.79	2456.9	3612.6	3821.52
A0A0H2ZGA2	11	6	63.9304	RND efflux membrane fusion protein OS=Pseudomonas aeruginosa (strain UCBPP-PA14) GN=mexH PE=3 SV=1	24427.1	25446.8	37197.4	33135.4	38278.2	42018.5	17076.2	18140.5	2476.24	2909.47	3114.14	3280.72	3520.62	3178.52	2805.22	2576.36	3486.55	4141.34	5363.6	5234.15	4732.59	4017.12	8237.05	8084.5	3247.08	2970.62	2643.12	2744.95	3913.89	3710.02	3607.22	3129.05
Q02MN4	3	1	19.8484	Uncharacterized protein PA14_33160 OS=Pseudomonas aeruginosa (strain UCBPP-PA14) GN=PA14_33160 PE=1 SV=1	21.4407	13.7972	0	0	167.696	113.976	146.571	103.854	0	0	54.0363	85.688	70.7494	90.2502	15.0625	13.7349	23.7488	12.0322	0	21.8168	0	0	0	0	22.8131	49.5109	48.1774	59.2129	66.1077	41.0916	0	5.74826
A0A0H2ZAZ1	5	2	32.1668	Chitinase OS=Pseudomonas aeruginosa (strain UCBPP-PA14) GN=chiC PE=3 SV=1	9513.52	11655	14772.4	12471	9350.01	9313.73	6097.53	6468.46	2187.08	2603.91	1812.01	1780.83	2941.17	3645.98	2074.95	2086.12	1260.18	1059.81	1219.47	840.297	705.745	1007.42	1336.88	712.587	2424.79	1854.73	2910.29	2925.56	1496.93	1440.32	3151.74	3254.48
A0A0H2Z9Z1;A0A0H2ZG56	26	10	160.938	Phenazine biosynthesis protein PhzE OS=Pseudomonas aeruginosa (strain UCBPP-PA14) GN=phzE2 PE=4 SV=1	33730.6	35318.2	54494.5	43401	50407.2	48680.5	33112.4	29631.2	4839.05	3948.41	5045.39	4948.03	3909.95	3821.56	4011.45	3953.19	7238.2	7491.66	10593.2	8339.9	6094.32	5258.98	8559.17	9982.77	4336.41	4208.39	4485.46	4203.48	9161.27	8481.15	4260.06	4350.2
A0A0H2ZIM7	6	1	26.7959	Glucose-1-phosphate thymidylyltransferase OS=Pseudomonas aeruginosa (strain UCBPP-PA14) GN=rmlA PE=3 SV=1	392.077	173.043	102.255	165.287	61.4591	57.2067	333.128	295.698	605.712	443.549	129.949	291.632	587.885	553.541	324.182	345.601	1109.24	994.206	1425.88	2383.62	2389.56	1447.18	2506.83	2693.85	160.494	133.337	100.213	152.203	1177.33	1086.51	213.777	312.529
A0A0H2Z9D2	7	2	34.0619	Aerotaxis receptor Aer OS=Pseudomonas aeruginosa (strain UCBPP-PA14) GN=aer PE=4 SV=1	84.0334	95.6719	0	210.025	29.0628	167.285	40.9756	96.8594	484.807	498.134	421.287	380.342	1674.16	1396.49	976.834	992.019	1910.94	1194.73	73.511	183.936	104.301	88.1239	102.691	142.862	192.699	157.332	1185.17	505.808	135.902	115.129	49.739	94.0622
A0A0H2ZFK0	18	10	102.36	Probable metal transporting P-type ATPase OS=Pseudomonas aeruginosa (strain UCBPP-PA14) GN=PA14_13170 PE=3 SV=1	26487.2	27958.8	57434.5	70518	38229.8	39968.5	41945.7	44771.1	4926.32	5088.14	6069.21	6318.34	5239.58	5115.93	5377.97	4980.76	5502.87	5196.43	4988.57	5925.26	6345.73	6480.57	5947.42	7152.22	5783.81	5084.6	4744.7	4645.65	5364.35	5513.39	4645.22	4797.04
A0A0H2Z5X2	2	1	8.8416	RNA polymerase sigma factor OS=Pseudomonas aeruginosa (strain UCBPP-PA14) GN=algU PE=3 SV=1	688.203	401.976	903.541	1496.56	143.698	25.9992	407.117	321.641	68.6315	73.733	78.9177	85.2075	58.1395	50.7667	90.6552	56.5359	62.1738	14.0541	160.677	323.991	0	0	448.06	542.234	99.9638	126.277	51.3627	95.0629	85.6103	82.3468	79.1296	79.194
A0A0H2ZGT7	1	1	7.4357	Uncharacterized protein OS=Pseudomonas aeruginosa (strain UCBPP-PA14) GN=PA14_62680 PE=3 SV=1	359272	407946	243711	348443	165174	163919	175719	183298	28078	30155.2	24069.3	22913.1	57544.8	55730.7	24123.2	23760.3	66796.3	75203	111062	108842	94791.5	102874	124471	123027	20151.6	17681	30828.8	28886.6	69222.3	64234.4	35889	32944.2
Q02T79	10	2	59.6822	50S ribosomal protein L4 OS=Pseudomonas aeruginosa (strain UCBPP-PA14) GN=rplD PE=3 SV=1	17058.8	22635.5	12726.9	13958.7	19638.5	20474.9	12671.5	13041.5	1539.15	1729.43	2909.92	3167.97	2741.51	2862.44	1055.03	1344.81	7481.03	8637.23	21703.6	19391.5	3681.12	3984.33	21532.2	21086.1	1872.3	1976.92	823.214	956.33	10822.1	11371.4	1717.53	1704.1
A0A0H2Z6U8	2	1	10.1994	Uncharacterized protein OS=Pseudomonas aeruginosa (strain UCBPP-PA14) GN=PA14_54180 PE=3 SV=1	267.709	435.764	84.4198	70.6562	102.314	142.508	444.412	519.985	853.7	429.918	925.991	873.089	719.28	703.197	1122.92	889.043	1763.29	1103.07	1679.61	2124.26	1562.75	1324.51	3478.74	2662.26	506.691	975.518	1014.25	971.457	1267.65	833.595	544.776	458.481
A0A0H2Z6F1	3	1	16.0147	Type II secretion system protein K OS=Pseudomonas aeruginosa (strain UCBPP-PA14) GN=hxcX PE=3 SV=1	45.8215	17.4709	0	0	39.9323	0	36.4589	87.0095	206.944	181.122	230.502	178.333	173.32	245.502	263.503	212.648	71.1139	151.332	99.9291	166.792	27.3505	66.7722	39.8641	0	185.343	281.873	246.331	271.259	156.575	95.9257	22.645	73.3023
A0A0H2Z7U1	6	1	36.4975	3-oxoacyl-[acyl-carrier-protein] synthase III OS=Pseudomonas aeruginosa (strain UCBPP-PA14) GN=pqsD PE=4 SV=1	6209.61	4685.59	6150.29	6607.77	7977.23	7661.97	3659.54	3692.66	1589.78	1127.83	1029.65	1162.56	1306.04	1077.76	860.385	1074.65	6579.97	6571.19	7622.4	6722.29	13445.5	13008.4	5835.99	5389.49	1641.94	1258.37	1352.32	1387.23	780.75	889.693	1535.83	1905.09
Q02FU3	4	1	29.2657	3-methyl-2-oxobutanoate hydroxymethyltransferase 2 OS=Pseudomonas aeruginosa (strain UCBPP-PA14) GN=panB2 PE=3 SV=1	103.076	178.762	50.607	0	74.545	25.073	160.617	177.464	405.989	340.149	265.179	194.462	370.037	268.04	534.583	134.479	212.265	602.824	705.249	427.208	167.564	349.614	2702.28	100.409	168.752	294.455	265.113	73.5052	573.078	357.616	133.177	57.8089
A0A0H2ZCD0	7	2	47.6546	Uncharacterized protein OS=Pseudomonas aeruginosa (strain UCBPP-PA14) GN=PA14_29330 PE=4 SV=1	283.033	422.028	403.84	574.713	117.969	395.141	361.13	386.704	2515.34	2893.27	1358.98	1577.63	1498.72	1855.24	1178.59	1198.73	2904.22	3676.5	2677.87	1841.79	3095.43	3197.58	1166.51	1411.87	1811.76	1913.73	1467.03	1445.83	976.481	1081.47	3094.81	3280.87
A0A0H2Z705	2	1	10.2057	Uncharacterized protein OS=Pseudomonas aeruginosa (strain UCBPP-PA14) GN=PA14_54340 PE=4 SV=1	889.254	1116.33	759.906	428.143	206.691	538.195	1335.15	1647.73	99.2385	32.6549	200.146	175.465	135.902	160.272	103.378	128.822	126.775	109.325	599.901	891.884	18.6118	69.5702	1111.83	1246.71	185.775	215.938	168.705	162.203	466.938	650.041	61.2459	98.3002
A0A0H2ZDH5	3	2	14.9658	Peptidyl-prolyl cis-trans isomerase OS=Pseudomonas aeruginosa (strain UCBPP-PA14) GN=ppiA PE=3 SV=1	123.951	89.4073	225.269	106.069	447.395	510.662	590.287	677.871	3499.28	3435.27	779.787	837.826	1802.68	2395.89	717.111	772.527	1378.03	1960.99	3675.81	3569.05	114.154	153.621	4109.71	3402.47	583.134	873.655	4300.29	3204.51	158.607	336.31	502.614	894.767
A0A0H2ZBP7	9	1	54.3281	Putative chemotaxis transducer OS=Pseudomonas aeruginosa (strain UCBPP-PA14) GN=PA14_26280 PE=4 SV=1	6370.43	5485.28	8129.92	5764.56	4010.49	3604.13	4347.88	4256.53	723.126	807.322	756.071	941.997	1195.36	1336.7	1022.37	925.37	929.724	989.748	1031.81	675.771	581.13	672.144	721.209	910.699	1031.2	922.151	1569.98	1583.87	988.988	1064.65	1427.92	1470.45
A0A0H2Z8G2	5	1	27.0889	Putative enzyme OS=Pseudomonas aeruginosa (strain UCBPP-PA14) GN=PA14_47490 PE=4 SV=1	15.482	14.9785	18.9992	0	70.7224	32.1545	22.9753	51.6027	340.624	297.009	68.4667	127.569	125.126	184.741	107.576	190.22	80.2807	81.219	9.67439	89.0686	123.475	185.755	17.2294	28.4479	165.106	159.23	109.568	166.31	57.8298	161.321	145.22	239.1
A0A0H2Z6R3	3	1	15.8637	Probable transcriptional regulator OS=Pseudomonas aeruginosa (strain UCBPP-PA14) GN=PA14_53730 PE=4 SV=1	96.5583	78.7318	161.332	52.5268	41.5788	38.7633	447.571	370.019	461.787	449.712	600.833	522.412	635.976	442.122	1061.75	929.876	505.918	711.789	282.633	439.867	146.254	113.931	526.318	411.389	832.657	1115.98	1410.86	1501.45	975.405	501.347	689.719	536.673
A0A0H2ZFN3	20	10	127.163	Outer membrane protein OprG OS=Pseudomonas aeruginosa (strain UCBPP-PA14) GN=oprG PE=4 SV=1	28767.8	30263.5	53717.5	49315.8	26448.6	24603.1	21048.1	22711.4	146307	157409	96263.8	92425.9	70367	78152.1	70885.7	72513.9	178065	176148	199704	180915	192815	187813	194235	199494	115287	105262	73061.2	70243.4	80770.1	83309.9	154807	158545
A0A0H2ZHS2	4	1	33.5304	Putative magnesium transporter, MgtC family OS=Pseudomonas aeruginosa (strain UCBPP-PA14) GN=mgtC PE=4 SV=1	42.7375	0	207.91	9.38242	133.091	99.4372	464.827	491.638	1176.8	1083.21	1764.9	1587.1	392.891	448.962	967.867	1009.17	498.678	181.905	403.498	311.26	858.668	760.077	287.14	194.842	1401.18	1202.17	601.078	794.362	81.7371	156.033	1365.43	1500.25
A0A0H2ZIL7	4	2	25.5965	Putative ABC-type amino acid transporter OS=Pseudomonas aeruginosa (strain UCBPP-PA14) GN=PA14_67840 PE=4 SV=1	1711.66	1699.45	614.133	568.556	1299.93	894.384	2049.21	1936.7	7690.17	8520.18	6743.25	6851.05	7304.25	6976.13	7223.87	7024.2	5614.78	6573.17	8641.05	8971.34	4954.46	5220.57	6200.34	7908.67	4681.29	7146.95	8132.48	7942.72	10643	10528.3	6787.43	6202.7
A0A0H2ZF64	16	6	87.936	Outer membrane protein OS=Pseudomonas aeruginosa (strain UCBPP-PA14) GN=opmD PE=3 SV=1	8454.91	11471.2	18139.1	17371.6	14237.4	14232.4	11472.2	10452.6	3420.98	2068.69	2034.05	2120.35	2249.74	2119.08	2377.85	2213.93	2879.18	2583.1	2802.91	2777.09	2692.55	2584	3223.66	2417.67	2330.65	2177.38	2572.41	2931.11	3068.4	3242.68	2469.56	3899.7
A0A0H2Z9K9	3	2	21.1951	Uncharacterized protein OS=Pseudomonas aeruginosa (strain UCBPP-PA14) GN=PA14_40780 PE=4 SV=1	1807.27	938.513	463.361	220.184	337.245	1432.3	760.102	915.925	1710.37	1425.51	1602.66	1451.64	2684.87	2985.43	1758.08	1580.18	4228.32	4464.84	210.058	4129.13	2193.38	6593.66	9613.94	7566.25	1660.4	1054.97	1438.06	2435.35	4250.63	5517.28	2269.49	1942.23
A0A0H2ZIA9	6	3	45.8709	Branched-chain amino acid transferase OS=Pseudomonas aeruginosa (strain UCBPP-PA14) GN=ilvE PE=3 SV=1	2506.11	2069.1	809.039	499.671	5185.91	5519.54	3408.92	4058.58	21102.9	19791.2	13192.1	12865.1	13992.8	13822.8	17374.5	21634.5	8516.11	8637.57	2699.04	2509.81	21969.6	22796.3	3650.58	2121.94	11278.2	16368.2	17633.6	15470.5	5653.47	5271.82	17744.4	19530.4
A0A0H2ZEC9	2	1	10.4262	Putative protease OS=Pseudomonas aeruginosa (strain UCBPP-PA14) GN=PA14_13290 PE=4 SV=1	0.00176051	0.0120126	158.222	33.0388	22.0795	12.1772	206.61	231.024	191.541	140.992	289.038	253.856	204.393	185.4	286.68	267.289	71.6081	85.0415	205.998	101.163	0	35.308	0	0.0683629	389.372	376.15	416.554	373.416	343.966	274.285	272.137	305.935
A0A0H2ZGI5	9	3	59.7653	Probable phenazine biosynthesis protein OS=Pseudomonas aeruginosa (strain UCBPP-PA14) GN=phzF1 PE=4 SV=1	22058.6	25715.6	9126.45	2277.35	18635.5	7284.25	25658.4	23968.8	4164.7	4120.49	5116.46	5467.86	1931.67	1930.88	3927.44	3902.24	2894.95	2684.06	1569.25	2485.76	5226.44	6718.59	1861.3	2067.19	3591.67	4923.04	2456.6	2612.7	1464.93	1298.56	4483.8	4135.88
A0A0H2ZC07	4	1	21.9867	Cold-shock protein CspD OS=Pseudomonas aeruginosa (strain UCBPP-PA14) GN=cspD PE=4 SV=1	595.83	582.144	53.4154	48.6329	718.434	931.558	547.349	500.568	129.639	16.2375	89.3639	135.78	288.564	347.037	74.2261	131.054	107.761	60.1266	128.497	66.676	69.6735	170.987	53.2803	170.242	57.631	42.7661	125.669	150.345	146.401	53.7712	73.4892	98.0293
A0A0H2ZEI2	12	6	89.2341	Uncharacterized protein OS=Pseudomonas aeruginosa (strain UCBPP-PA14) GN=PA14_18810 PE=4 SV=1	21144.2	23001.3	20104.1	20614.6	26181.4	29568.9	29209.6	32060.9	4625.3	4676.99	5128.19	5560.83	5064.2	5305.73	4415.23	4524.74	5729.59	5759.84	10091.4	9217.98	4925.57	4844.08	13069.5	18954.5	4882.6	4455.45	4069.33	4516.56	6199.76	6590.98	4854.85	4950.82
A0A0H2ZJA2	12	7	59.3645	Putative transcarboxylase subunit OS=Pseudomonas aeruginosa (strain UCBPP-PA14) GN=oadA PE=4 SV=1	15020.7	16145.6	21772.8	22942.8	13952.4	11765.8	13376	13903.4	73214.6	80387.2	37996.2	39816.5	46990.1	51423.5	33324.1	34382.5	95575.5	103947	75450.8	70285.2	110993	114118	40860.8	44175.6	48547.8	47857.6	43283.3	43959.3	45143.9	51422.5	83981	90990.6
A0A0H2ZCJ8	2	1	11.4873	Uncharacterized protein OS=Pseudomonas aeruginosa (strain UCBPP-PA14) GN=PA14_28460 PE=4 SV=1	389.616	218.415	134.122	220.352	218.378	188.267	257.295	172.842	892.736	644.134	594.503	743.373	780.646	605.448	653.751	597.919	712.923	621.296	262.564	422.781	165.588	95.8157	233.8	375.879	1003.58	1192.15	1153.04	1140.4	1577.5	1395.43	790.265	744.836
Q02K16	2	1	9.7835	Nucleoid-associated protein PA14_44620 OS=Pseudomonas aeruginosa (strain UCBPP-PA14) GN=PA14_44620 PE=3 SV=1	1389.21	1456.35	3270.3	3069.44	841.75	919.669	1103.02	1150.23	176.584	257.532	594.949	589.615	238.979	214.679	267.385	311.879	221.619	227.84	1214.08	1209.27	55.5529	72.724	1872.25	1647.61	471.83	554.048	393.261	444.087	604.168	632.633	415.223	271.667
Q02U51	3	1	15.2029	Phosphopantetheine adenylyltransferase OS=Pseudomonas aeruginosa (strain UCBPP-PA14) GN=coaD PE=3 SV=1	172.569	75.3401	60.931	79.2856	167.817	152.805	88.8287	121.9	371.39	454.437	287.417	266.382	693.928	392.107	461.706	460.672	225.458	200.857	326.728	317.467	230.349	128.943	216.322	104.458	367.336	396.98	528.299	480.702	1059.01	928.07	354.323	327.971
A0A0H2ZIA1	12	4	113.008	Biotin carboxyl carrier protein OS=Pseudomonas aeruginosa (strain UCBPP-PA14) GN=accB PE=4 SV=1	2413.08	3119.85	3161.09	2910.41	6467.99	6957.05	3476.39	3563.48	17868.9	19977.3	8876.28	9281.03	17757.4	18581.2	17203.8	17136.9	12741.1	12293.3	4257.27	4081.01	29410	28480.3	2851.67	3266.79	14244.2	13575	23376.9	22682.9	10966.5	12324	27504.8	27459.3
Q02E39	6	2	30.9766	Acetylglutamate kinase OS=Pseudomonas aeruginosa (strain UCBPP-PA14) GN=argB PE=3 SV=1	30.1144	18.1976	7.30354	19.7148	36.735	21.0405	341.239	328.73	196.787	153.173	530.052	459.782	617.037	548.9	383.193	279.329	771.378	782.305	408.149	565.659	114.649	43.5129	488.221	533.963	116.518	209.98	497.107	383.003	70.2974	181.133	26.3564	10.4109
Q02T69	9	1	48.9892	50S ribosomal protein L24 OS=Pseudomonas aeruginosa (strain UCBPP-PA14) GN=rplX PE=3 SV=1	1267.22	1404.86	1210.06	1220.25	1813.69	1897.79	1249.57	1334.82	8128.48	9493.36	2723.54	2987.19	8046.46	9076.19	5491.11	6369.39	3831.71	3596.64	1475.86	1366.99	8903	9445.03	1217.77	1311.54	3590.89	3598.32	5579.57	5945.59	1792.55	1886.78	10216.6	9962.92
A0A0H2ZK85	1	1	5.5571	Putative sigma-70 factor, ECF subfamily OS=Pseudomonas aeruginosa (strain UCBPP-PA14) GN=PA14_01840 PE=3 SV=1	70.2736	186.424	250.168	492.946	170.325	199.827	111.622	246.577	146.899	91.8012	41.087	22.8499	22.3162	17.3682	33.4192	4.00861	76.0034	163.237	133.998	154.776	112.869	49.9057	133.263	23.2328	167.964	83.9535	48.3858	24.6649	0	0	132.887	22.7666
Q02TY9	36	13	260.947	UPF0312 protein PA14_05510 OS=Pseudomonas aeruginosa (strain UCBPP-PA14) GN=PA14_05510 PE=3 SV=1	586802	616850	623683	662850	549660	508363	356801	347476	118221	120850	104662	101366	129695	133871	117038	112057	137063	144074	169899	157326	167500	166968	191845	196641	115563	105212	117673	115376	202988	204436	142125	130673
A0A0H2ZD84	21	12	118.373	Uncharacterized protein OS=Pseudomonas aeruginosa (strain UCBPP-PA14) GN=PA14_18860 PE=4 SV=1	111222	130113	42740.4	43753.5	49093.3	49219.9	80607.6	86290.5	18853.6	18255.6	15271.7	15223.6	16131.7	16376.6	14790.8	16144.1	17268.3	16245.2	18306.9	19392.2	22083.7	20363.4	18685.4	19236	16433.1	16427.4	17265.3	16772.3	19838	19438.2	22061.9	21123.1
A0A0H2ZJ61	8	4	44.9071	Two-component response regulator PhoB OS=Pseudomonas aeruginosa (strain UCBPP-PA14) GN=phoB PE=4 SV=1	13869.1	10633.8	5416.82	4226.8	15897	14461.7	7872.25	6373.05	43895.9	38016.1	34137.1	30471.2	51187	41495.9	39990.2	36401.6	31277.4	30035.7	32366.5	26900.2	41267	31332.1	26873.2	22490.7	30092.8	32115.7	43772.7	41428.8	73489.4	57524.8	35998.1	32860.2
A0A0H2ZCE0	3	1	19.2956	Putative porin OS=Pseudomonas aeruginosa (strain UCBPP-PA14) GN=opdB PE=4 SV=1	172.725	344.619	0	0	100.722	188.868	665.839	468.035	861.929	1025.11	1200.76	1252.83	1006.9	1256.66	946.445	989.867	767.996	859.394	784.057	688.849	819.328	570.749	299.706	437.536	358.166	599.062	1096.83	743.479	258.051	284.129	119.456	134.682
A0A0H2ZE75	7	4	29.0474	Flagella basal body P-ring formation protein FlgA OS=Pseudomonas aeruginosa (strain UCBPP-PA14) GN=flgA PE=3 SV=1	22944.3	24975.6	27986.5	35341.3	16094.7	16942.9	16079.5	17456.4	2963.26	3303.4	9477.6	10097.3	5037.21	6450.37	2704.17	3050.45	15705.2	14715.5	32535	34770.2	2355.74	2837.65	38060.1	41557.3	6481.43	6230.06	2735.93	3203.91	22192.6	22317.8	2982.43	4243.12
Q02DZ3	33	17	239.786	Phosphate-binding protein PstS OS=Pseudomonas aeruginosa (strain UCBPP-PA14) GN=pstS PE=1 SV=1	58810.2	58776.9	64231.9	67115.7	59599	55936.3	44634	45748.1	223621	245777	164059	161260	253460	252825	197234	197740	141317	158069	141307	146343	130551	135012	181795	197194	132496	156705	206299	194663	324513	368149	237752	238143
A0A0H2Z7G1	7	2	54.0821	Probable outer membrane protein OS=Pseudomonas aeruginosa (strain UCBPP-PA14) GN=PA14_50880 PE=3 SV=1	3998.65	4197.7	19561.4	19871.3	8311.98	8933.33	5767.93	6593.31	2415.15	2401.33	5994.01	6160.67	875.382	1226.32	859.796	974.158	6832.86	6067.16	11847.8	11436.7	6354.98	6451.44	10075.2	11578	3729.12	3613.94	776.515	1053.34	1855.01	1952.61	2672.31	3467.98
A0A0H2ZK40	3	1	20.9869	Uncharacterized protein OS=Pseudomonas aeruginosa (strain UCBPP-PA14) GN=PA14_01170 PE=4 SV=1	846.076	450.717	188.733	286.579	778.811	668.799	465.806	712.183	2485.04	1609.36	994.336	807.995	1106.04	1299.01	751.209	944.977	898.238	595.784	610.177	1103.94	97.1593	75.6868	10.2022	0	1400.54	1396.17	3361.27	4259.83	634.437	684.136	551.068	650.49
Q02T66	11	4	62.2203	30S ribosomal protein S8 OS=Pseudomonas aeruginosa (strain UCBPP-PA14) GN=rpsH PE=3 SV=1	91388.6	96704.1	117603	119590	48817.2	54756.3	49607.3	51298.7	21683.8	21663.7	24645.1	25551.5	25107.7	26368.5	16098.6	17544.5	44320.5	45498.3	111443	110961	23965.7	23364.9	153651	167638	22603.7	21766.8	18465.5	18762.7	65227.7	67000	21938.8	22877.1
A0A0H2Z982	8	4	47.8967	Translocator outer membrane protein PopD OS=Pseudomonas aeruginosa (strain UCBPP-PA14) GN=popD PE=4 SV=1	6097.83	6365.92	9653.11	10249	8124.02	5590.12	6901.65	5902.55	2937.89	6394.86	4146.66	4077.24	4602.91	3593.53	5684.54	6366.3	44363.9	50169.5	6273.09	4741.3	6986.51	6276.45	10044.6	11537.4	4647.89	3855.59	4673.53	3789.8	5242.14	4730.59	6624.23	3477.03
A0A0H2ZKJ8	5	1	23.3464	Major intrinsic multiple antibiotic resistance efflux outer membrane protein OprM OS=Pseudomonas aeruginosa (strain UCBPP-PA14) GN=oprM PE=3 SV=1	2808.09	5052.45	3441.65	5327.98	3015.27	4560.01	2242.74	2337.45	698.234	597.534	1229.25	1576.46	1255.59	1054.55	724.064	660.235	1931.94	3382.13	4043.11	5158.33	734.097	509.305	3915.49	1993.6	1014.95	980.459	754.863	670.594	3574.74	2422.49	837.025	706.181
A0A0H2Z9S4	7	2	50.2086	Putative enoyl-CoA hydratase/isomerase OS=Pseudomonas aeruginosa (strain UCBPP-PA14) GN=PA14_41950 PE=4 SV=1	403.257	648.861	481.119	130.784	1038.92	1191.47	841.968	639.483	1782.74	2213.77	1722.92	2093.31	2311.91	3063.57	2070.8	2061.68	1140.36	3224.2	1467.99	1938.21	2104.2	2370.76	1564.05	1405.21	1296	2608.58	2217.88	2366.66	2579.15	3112.89	2615.36	2696.17
A0A0H2ZIH0	3	2	16.4862	N5-carboxyaminoimidazole ribonucleotide synthase OS=Pseudomonas aeruginosa (strain UCBPP-PA14) GN=purK PE=3 SV=1	2078.07	1203.22	22.2174	0	1113.38	581.614	1289.86	1409.73	2480.01	2493.02	1996	1778.14	2346.04	2250.75	2330.01	2054.62	4660.04	4069.43	2291.2	1950.56	3727.22	2858.32	3739.3	4239.91	1243.17	1235.15	1384.73	1419.81	1581.77	1292.16	1399.31	1971.71
A0A0H2Z8W6	4	4	22.6396	Putative enzyme OS=Pseudomonas aeruginosa (strain UCBPP-PA14) GN=PA14_40030 PE=4 SV=1	14025.1	16410.6	9458.78	9183.64	8529.7	7754.17	10545.1	10516	2935.31	2975.79	3338	3339.47	2855.05	3262	3059.24	2922.87	5372.07	6748.09	10644.1	10662.9	1682.29	2322.39	8173.15	9888.76	3071.2	3572.19	3416.52	3719.11	5051.74	6782.82	3639.8	3443.45
Q02S21	5	4	27.2424	ATP-dependent RNA helicase RhlB OS=Pseudomonas aeruginosa (strain UCBPP-PA14) GN=rhlB PE=3 SV=1	4784.1	7040.35	2638.37	689.766	5420.96	5747.73	7372.19	6726.59	16427.1	15858.1	9982.26	9220.98	21349.8	18977.8	11959.4	12198.1	18551.8	16326.5	18662.4	22788.4	16407.1	13788	17547.2	16077.3	4899.79	7694.45	14445.9	12625.9	11153.9	9388.01	2177.7	2370.33
Q02IH8	10	4	55.6605	Phosphoribosylaminoimidazole-succinocarboxamide synthase OS=Pseudomonas aeruginosa (strain UCBPP-PA14) GN=purC PE=3 SV=1	1435.39	834.268	1673.31	833.589	2849.97	2782.57	2644.5	2339.68	8239.71	7678.49	6356.37	6388.04	5934.46	5255.92	6568.8	6557.6	5417.62	5222.81	2582.27	3099.77	8186.17	8131.59	1632.58	1669.09	7526.45	6780.49	6431.19	6461.19	5057.34	3856.2	8097.75	8141.97
A0A0H2ZE93	4	1	23.7917	Ferredoxin--NADP+ reductase OS=Pseudomonas aeruginosa (strain UCBPP-PA14) GN=fpr PE=4 SV=1	254.669	205.173	194.083	16.5171	730.934	1139.68	762.748	1021.27	568.862	1267.44	1033.8	1049.38	2151.54	1409.53	1415.89	1116.31	404.447	754.723	863.204	736.83	1544.7	1396.66	668.086	531.374	1766.95	1277.85	2226.81	1502.99	2285.3	2021.17	2016.26	1675.49
A0A0H2Z792	10	4	55.4065	Glutathione peroxidase OS=Pseudomonas aeruginosa (strain UCBPP-PA14) GN=PA14_47550 PE=3 SV=1	12270.6	11812.1	14461.3	14564.9	12195.6	12401.9	8384.4	8312.7	3249.56	3038.71	3313.44	3221.78	4103.82	4142.3	3621.93	3002.05	4144.48	4449.9	5774.75	5870.43	5098.04	4740.44	6013.72	6060.95	3735.54	3759.64	4591.98	4527.26	6630.49	6400.48	4830.91	4816.61
A0A0H2ZE11	1	1	5.6071	Putative acyl carrier protein OS=Pseudomonas aeruginosa (strain UCBPP-PA14) GN=PA14_20940 PE=4 SV=1	374.622	994.108	2427.27	187.743	0	0	2176.77	1604.84	913.084	891.924	1451.82	1471.3	1756.45	1748.45	1944.64	2054.39	5152.46	5361.64	5837.89	6710.16	2087.01	588.588	290.394	140.27	1520.37	2665.1	2503.67	3532.42	3888.43	4360.52	1502.08	1149.61
A0A0H2ZCY5	4	1	23.0226	Na(+)-translocating NADH-quinone reductase subunit C OS=Pseudomonas aeruginosa (strain UCBPP-PA14) GN=nqrC PE=3 SV=1	1398.89	1127.09	2601.09	3189.3	817.717	996.907	1411.53	1895.4	659.013	707.386	908.972	1213.94	338.879	555.917	904.566	1054.29	472.896	502.725	2308.36	2905.38	648.277	297.594	7304.04	6890.01	1510.89	1053.8	590.877	807.421	918.017	1182.78	803.55	684.072
A0A0H2Z6G9	5	1	23.8454	Putative lipoprotein OS=Pseudomonas aeruginosa (strain UCBPP-PA14) GN=PA14_51260 PE=4 SV=1	77.6025	232.767	53.7665	21.2621	165.725	85.9524	267.594	387.531	87.0078	207.93	116.453	197.346	228.621	101.178	174.848	176.52	0	104.29	167.053	105.78	12.5848	69.2674	167.419	0	249.473	168.059	243.316	369.698	381.564	353.339	135.52	139.154
A0A0H2ZH03	76	38	506.571	Mg(2+) transport ATPase, P-type 2 OS=Pseudomonas aeruginosa (strain UCBPP-PA14) GN=mgtA PE=4 SV=1	49325.8	48417.5	56221.7	56562.8	51215.6	46506.8	50227.2	52469.5	225283	246562	195533	190274	86849.5	86516.5	150516	148921	94201.1	92192	94063.4	91597.3	175061	167395	85057.7	90251.9	208668	196163	91738	93288	99833.1	95011.9	265593	239177
A0A0H2Z7P7	12	3	61.5184	Uncharacterized protein OS=Pseudomonas aeruginosa (strain UCBPP-PA14) GN=PA14_52060 PE=4 SV=1	7423.2	5404.43	8222.38	7429.58	6416.49	5765.76	4681.38	4015.61	2047.09	1956.03	1893.46	1882.04	2857.17	2635.34	1734.83	1863.48	2008.28	1463.71	1653.05	2414.26	1987.21	1525.39	1972.17	2290.02	2677.09	2240.4	2344.19	2406.43	4696.39	4462.91	2720.54	1894.59
A0A0H2ZBX7	9	4	73.666	Molybdenum cofactor biosynthesis protein B OS=Pseudomonas aeruginosa (strain UCBPP-PA14) GN=moaB2 PE=3 SV=1	50242.4	69202.8	45205.5	53792.4	31464.8	34438.9	31498.4	33068.8	16696.9	18932.6	12482.2	12331.5	12431.6	13354.5	11729.6	10568	19753	23440.8	37812.7	40173.6	19994.8	22109.5	47905.8	48365.2	12557.8	11736.8	12215.4	13468.1	29128.9	30960.9	17336.3	16280.7
Q02NV3	29	12	200.086	Transaldolase OS=Pseudomonas aeruginosa (strain UCBPP-PA14) GN=tal PE=3 SV=1	164532	158299	185150	205068	89411.3	89127.6	94399.6	97896.5	44462.2	44630.8	48401.9	50162.6	47344.4	52502.4	40569.1	43918.8	74959	77725	183264	184576	40839.1	43387.4	281083	307043	47908.9	49367.8	44840.7	46719.7	119380	124807	54631.1	55863.7
A0A0H2ZIV9	16	7	90.0344	Delta-aminolevulinic acid dehydratase OS=Pseudomonas aeruginosa (strain UCBPP-PA14) GN=hemB PE=3 SV=1	5627.29	9351.94	8288.73	5262.6	68975.3	60453.4	13676.2	14137.6	149830	177487	64621.1	53780.2	23721.2	17479.3	51799.5	53267.4	40044.5	40276.4	19698.6	18398.5	142116	154448	19340.7	18909.5	92995.4	91221.4	31757	32203.5	20639.4	17613.9	114435	95962.2
A0A0H2ZD34	7	3	37.7139	Acyl carrier protein OS=Pseudomonas aeruginosa (strain UCBPP-PA14) GN=acpP PE=3 SV=1	19093.1	16499.2	15996	15305.1	59319.5	61491.4	17059.5	18254.4	103198	110591	49012.7	53949.2	81181.4	93948.6	83491.7	87377.5	69162.3	61081.1	20300.5	19265.4	125010	148008	9167.47	11024.4	77367.2	71344.1	104991	102779	57788.7	65590.8	113537	115478
A0A0H2ZI80	21	6	142.037	Protease subunit HflK OS=Pseudomonas aeruginosa (strain UCBPP-PA14) GN=hflK PE=4 SV=1	22689	24340.2	28026.5	29902.9	21089.7	23418.6	17142.9	18534.7	7327.35	8278.39	8784.21	8886.88	5316.18	5373.19	7486.44	7166.06	8316.26	8481.23	15617.5	17088.9	10032.4	10894.9	19500.8	19175	8695.97	7544.56	6123.24	5707.38	8778.71	10751.5	9007.65	8891.79
A0A0H2ZEJ4	3	1	14.4681	Cyclohexadienyl dehydratase OS=Pseudomonas aeruginosa (strain UCBPP-PA14) GN=pheC PE=3 SV=1	681.373	653.032	805.673	1167.69	140.213	288.051	729.697	949.171	367.338	569.429	523.915	501.335	668.37	672.167	833.571	720.311	1364.51	1864	2204.19	2120.28	1708.69	1810.44	2229.16	1819.23	532.57	485.974	337.812	594.221	1945.11	2877.27	610.031	625.815
A0A0H2ZH13	3	1	15.6968	Putative ATP-binding component of ABC transporter OS=Pseudomonas aeruginosa (strain UCBPP-PA14) GN=PA14_57930 PE=4 SV=1	320.328	156.143	229.545	122.144	203.863	502.755	465.451	354	715.954	1142.26	873.886	890.025	673.014	923.532	585.718	710.408	844.671	540.114	545.902	800.169	616.255	625.635	335.37	465.203	1102.11	1081.14	857.172	942.274	362.248	327.066	1300.38	1341.3
Q02SE5	2	1	10.7344	Glutamate-1-semialdehyde 2,1-aminomutase OS=Pseudomonas aeruginosa (strain UCBPP-PA14) GN=hemL PE=3 SV=1	256.331	382.266	109.219	0	118.817	25.6961	534.805	518.316	465.544	320.43	617.008	447.587	507.382	238.522	671.288	523.257	641.956	546.795	322.901	207.864	1053.11	676.091	1410.32	1129.41	276.416	558.272	494.607	357.675	58.7382	17.073	272.738	88.1033
A0A0H2Z6L4	4	1	25.4628	Uncharacterized protein OS=Pseudomonas aeruginosa (strain UCBPP-PA14) GN=PA14_55290 PE=4 SV=1	2158.3	3689.4	4758.03	5391.78	4780.93	2825.19	2488.9	2019.6	1171.95	1186.23	1796.81	1852.16	1427.42	1245.54	1528.31	1049.54	3084.08	4208.13	5957.56	5634.74	1976.04	1317.86	6563.52	5713.03	1106.3	1430.52	852.787	1232.63	4928.78	2875.63	1356.88	927.182
A0A0H2ZJ65	6	3	33.7464	Phosphate-specific transport system accessory protein PhoU OS=Pseudomonas aeruginosa (strain UCBPP-PA14) GN=phoU PE=3 SV=1	655.506	266.77	1018.11	260.403	1682.52	981.535	713.243	775.299	2678.59	1985.07	2862.81	3265.3	1649.63	1873.69	2413.94	2593.49	1112.35	1088.29	954.174	933.099	1548.96	2290.58	211.786	372.826	2964.33	2869.1	2156.5	2153.17	1199.37	1709.24	3233.09	2513.23
A0A0H2ZG04	7	5	39.4083	Uncharacterized protein OS=Pseudomonas aeruginosa (strain UCBPP-PA14) GN=PA14_11320 PE=4 SV=1	6635.98	7810.84	9370.58	7008.16	9606.22	10590	5466.77	5879.22	7101.77	15200.5	7396.9	7382.53	9550.47	9037.2	8295.3	7740.2	12374.3	17423.6	21604.7	19533.9	33543.2	31176.4	26891.2	24532.1	11059.4	11395.7	12205	10964.8	13605.6	12565.6	18577.7	11063.9
A0A0H2ZEZ4	9	2	63.988	Putative oxidoreductase, FAD/FMN-binding OS=Pseudomonas aeruginosa (strain UCBPP-PA14) GN=PA14_16260 PE=4 SV=1	2.03976	110.624	305.982	63.9875	31.5199	6.65515	227.533	207.887	294.468	315.801	226.42	307.223	418.869	344.53	538.377	400.452	256.03	188.938	68.0339	63.2189	716.048	409.494	117.791	51.0907	452.657	397.007	502.058	569.261	32.4268	10.8324	629.375	274.584
A0A0H2ZHY7	22	8	130.019	Putative bacterioferritin OS=Pseudomonas aeruginosa (strain UCBPP-PA14) GN=PA14_64520 PE=4 SV=1	17791.4	19215	24877	24679.4	21264.1	21423.9	14442.1	13955.5	7057.93	7652.52	6049.75	6018.84	6036.95	6665.06	7062.69	6528.45	7787.76	7329.38	7461.41	6476.21	5691.33	5759.45	6418.61	6570.59	6056.05	6084.51	7998.1	6437.33	6087.66	5910.65	7453.17	7025.45
A0A0H2ZIK7	8	3	43.854	Putative carboxyl-terminal protease OS=Pseudomonas aeruginosa (strain UCBPP-PA14) GN=ctpA PE=3 SV=1	18269.8	20126.3	21359.1	31912.3	8751.84	10559.5	9983.69	10215.7	3844.67	4272.46	6322.73	6548.02	6831.76	6826.17	4683.73	4827.77	12609.9	11713.5	20677.9	22851.7	5321.87	5682.09	17574.7	19825.2	5472.99	6524.27	6129.91	6049.65	13494.2	15578.2	5924.81	5323.03
A0A0H2ZC62	16	5	96.4392	Amidophosphoribosyltransferase OS=Pseudomonas aeruginosa (strain UCBPP-PA14) GN=purF PE=3 SV=1	6721.97	5104.06	5222.1	5860.55	2966.95	3082.84	4478.68	4013.97	1549.92	1607.11	1674.23	1530.2	1731.62	1449.15	1663.59	1424.25	1891.51	1355.9	1977.54	1795.78	2290.03	1612.46	3491.23	2881.57	1976.49	1624.6	2336.51	1893.4	2046.57	2080.57	1822.82	1230.08
A0A0H2ZHT6	42	11	283.319	Carbamoyl-phosphate synthase large chain OS=Pseudomonas aeruginosa (strain UCBPP-PA14) GN=carB PE=3 SV=1	27798.5	33284.9	58981	58495	28227.4	26733.3	24029.5	26311.3	11406.4	12611.8	13022.1	12903.6	12196.9	11662.2	11272.1	10700.7	13575.1	15423	29307.2	31565.1	17884.6	17647.3	38840.8	40027.6	13243.5	11960.6	10860.4	10422.4	14989.7	16046.3	18448.3	16059.3
Q02EA3	6	1	36.8272	Porphobilinogen deaminase OS=Pseudomonas aeruginosa (strain UCBPP-PA14) GN=hemC PE=3 SV=1	224.423	130.762	453.87	0	70.9482	49.5466	1788.86	1376.63	136.511	140.844	965.689	907.921	1515.43	1581.8	1384.38	1525.09	1490.11	1135.91	1806.28	1863.07	1499.18	487.845	2099.43	599.623	894.488	1903.57	2219.76	2009.69	1799.96	1612.9	942.538	740.355
A0A0H2Z863	26	11	189.045	PhoP/Q and low Mg2+ inducible outer membrane prote OS=Pseudomonas aeruginosa (strain UCBPP-PA14) GN=oprH PE=4 SV=1	20532.9	18806.1	32096.5	22446.1	23715.4	22944.6	19962.3	16602.2	29833.9	33490.2	19290.8	17877.8	22381.3	19306.1	17716.3	16151.1	56568.5	54772.9	63345.6	44882.2	107599	84718.6	54780.5	48261.3	21228.6	20911.2	24266.1	21706.4	29588.8	28089.7	28892.5	20747.9
A0A0H2ZJX7	6	1	38.5853	Uncharacterized protein OS=Pseudomonas aeruginosa (strain UCBPP-PA14) GN=PA14_00670 PE=4 SV=1	56.8336	23.0515	0	62.3366	64.103	26.9121	77.244	66.7327	210.196	125.395	105.91	152.656	136.614	51.6872	146.161	157.28	120.27	54.453	81.6627	130.05	141.901	167.025	69.8757	71.0716	153.107	127.286	140.506	117.832	196.238	52.8992	100.107	161.716
A0A0H2Z7G5	2	1	12.1796	Peptidyl-prolyl cis-trans isomerase OS=Pseudomonas aeruginosa (strain UCBPP-PA14) GN=slyD PE=3 SV=1	813.142	956.698	661.064	699.903	193.766	139.045	894.351	785.273	185.892	225.959	320.479	318.09	451.599	637.725	349.43	421.114	193.359	325.443	146.677	421.893	20.1007	19.714	348.901	313.301	297.766	327.416	562.893	564.74	533.457	753.347	443.852	467.085
A0A0H2ZJJ4	2	1	10.3756	Uncharacterized protein OS=Pseudomonas aeruginosa (strain UCBPP-PA14) GN=PA14_71150 PE=4 SV=1	120.394	112.96	119.832	165.096	336	267.925	218.629	196.859	205.635	223.646	122.574	149.478	82.1638	123.898	96.2919	118.882	10.9433	56.0144	44.7238	69.0897	74.1717	190.901	44.5959	50.0571	133.371	201.011	159.957	107.581	42.8099	49.8682	122.972	177.301
A0A0H2ZES6	10	4	50.3133	Putative phage shock protein OS=Pseudomonas aeruginosa (strain UCBPP-PA14) GN=PA14_16150 PE=4 SV=1	12313.7	13992.1	14103.5	15479.2	14035.5	15568.8	8859.32	9100.33	12211.6	12736.8	9470.88	9395.42	8868.44	9667.59	8791.45	8631.76	80258.7	66507.7	13762.2	12390.3	14707.9	13884.3	11751.2	13097.3	12319.4	10999.8	10426.8	10266.9	15066.5	15436.4	14171.5	13529.2
A0A0H2ZCT2	2	1	10.7794	Putative enoyl-CoA hydratase OS=Pseudomonas aeruginosa (strain UCBPP-PA14) GN=PA14_27360 PE=4 SV=1	11.6837	0	0	0	137.812	38.7245	189.381	206.548	190.381	78.2459	218.489	287.61	233.942	241.536	176.642	230.55	150.168	124.174	150.283	105.611	55.128	101.819	72.5262	46.6868	192.415	175.482	151.807	217.329	223.974	313.614	184.551	151.036
A0A0H2ZB70	11	7	60.0544	Glucose dehydrogenase OS=Pseudomonas aeruginosa (strain UCBPP-PA14) GN=gcd PE=4 SV=1	13987.2	14720	13875.5	12383	14474.3	14648.8	14534.1	14379.1	4916.66	4916.58	4943.82	5346.69	4688.58	5183.43	4984.51	4861.76	6244.66	6283.13	7629.61	7069.57	8549.68	8579.78	7427.89	8364.58	5129.8	5129.1	4119.1	4133.97	5132.38	5024.27	6562.1	7111.53
A0A0H2ZEQ6	21	9	119.305	Putative outer membrane protein OmpH OS=Pseudomonas aeruginosa (strain UCBPP-PA14) GN=ompH PE=4 SV=1	70854.2	85220.8	122676	128555	55420.7	57424.9	44742.4	47020.8	33334.4	32193	29051.6	28947.3	26702.3	28714.7	21715.8	23841.9	45863.3	48902.8	108833	102974	31042.4	33499.7	128215	136095	30139.5	27206	22645.9	23602	57060	58869.5	31839.3	38641
A0A0H2ZL28	3	1	20.6162	Type IV pili response regulator PilG OS=Pseudomonas aeruginosa (strain UCBPP-PA14) GN=pilG PE=4 SV=1	219.16	134.676	272.33	80.5684	267.42	303.275	639.271	549.184	704.758	638.699	554.81	609.989	589.224	567.191	626.752	708.546	430.793	390.212	144.8	100.73	233.735	267.715	107.672	155.166	659.377	643.921	945.383	905.608	295.678	248.048	630.219	847.105
A0A0H2ZGH5	2	1	10.0971	Putative amidase/protease OS=Pseudomonas aeruginosa (strain UCBPP-PA14) GN=PA14_56370 PE=4 SV=1	768.58	514.45	987.268	918.326	1138.75	933.9	768.449	634.645	280.696	284.233	361.456	346.251	240.986	288.965	276.037	281.447	543.018	650.621	301.998	379.588	319.025	511.456	334.576	305.983	540.329	385.373	319.439	280.007	274.165	230.185	548.236	309.04
A0A0H2ZH69	3	2	16.8816	Putative oxidoreductase OS=Pseudomonas aeruginosa (strain UCBPP-PA14) GN=PA14_64840 PE=4 SV=1	543.587	442.025	285.209	467.204	457.371	667.533	629.862	866.357	1583.54	1958.37	1081.77	1189.59	1457.94	1774.91	1517.03	1730.12	802.273	883.625	415.087	354.29	1630.16	2284.02	405.922	235.333	1052.61	1445.75	1692.1	1621.77	565.464	771.482	2496.98	1899.78
A0A0H2Z8K4	6	2	35.7907	Putative transmembrane sensor OS=Pseudomonas aeruginosa (strain UCBPP-PA14) GN=PA14_47390 PE=4 SV=1	4881.06	6119.56	1749.23	1373.73	6684.79	8309.52	6098.14	5934.4	1839.74	1163.5	3304.94	3369.69	2208.39	2195.11	1135.2	1007.63	5640.35	6342.35	9116.1	10152.4	717.566	817.872	6445.09	6387.01	1722.11	2157.64	909.145	992.185	8383.31	8596.6	841.104	1343.14
A0A0H2Z7I6	38	20	272.086	ExoU OS=Pseudomonas aeruginosa (strain UCBPP-PA14) GN=exoU PE=4 SV=1	97457.9	111359	115892	122926	97604.7	97867.9	70042.8	78370.4	78872.9	79121.2	65583.8	66616.3	72709	78643.9	70246.4	70998.1	192550	203887	206689	197309	173418	166846	252273	226332	82648	78405.7	89446.9	87778	115401	118013	88137.3	89610.9
A0A0H2ZB73	33	20	202.983	Putative non-ribosomal peptide synthetase OS=Pseudomonas aeruginosa (strain UCBPP-PA14) GN=PA14_34840 PE=4 SV=1	37662.3	37179.7	58950.7	49081.3	42033.2	38008.9	35362.2	32201.3	15184.3	15347.9	14610.5	15068	14893	15800.9	14362.6	13773.4	18515	18599.3	22684.3	23065.2	17580.5	18456.1	31634.2	38249.6	15726.2	15209.3	15118.7	14383.3	19479.4	20494.7	16617	18037
A0A0H2ZK69	4	1	24.7969	Putative nucleoside 2-deoxyribosyltransferase OS=Pseudomonas aeruginosa (strain UCBPP-PA14) GN=PA14_01780 PE=4 SV=1	47.87	141.327	336.976	949.798	711.203	417.122	470.117	696.05	478.787	425.503	493.397	446.465	572.081	405.926	589.069	421.192	149.067	96.5327	220.55	227.239	224.656	53.992	199.254	211.374	551.592	271.802	306.305	222.281	49.1055	41.1145	198.126	181.347
A0A0H2ZIP3	47	25	331.442	Arginine deiminase OS=Pseudomonas aeruginosa (strain UCBPP-PA14) GN=arcA PE=3 SV=1	75229.8	80026.2	80052	83271	94468.1	96100.9	58429.9	62482.8	160368	176628	116388	115370	137860	147353	137443	138193	191005	212849	186028	205828	307599	303749	157753	164467	134957	131217	140894	143124	168476	167155	211109	191330
A0A0H2ZLE4	90	41	595.97	Putative ClpA/B protease ATP binding subunit OS=Pseudomonas aeruginosa (strain UCBPP-PA14) GN=clpA PE=4 SV=1	126301	142269	106899	114959	108749	107550	101790	103442	169946	181584	135144	135519	178369	177216	143696	149380	291170	321138	265705	274786	319106	311815	366657	346430	123733	133983	162104	160838	241502	239357	185840	172301
Q02P14	13	9	77.5175	Elongation factor P OS=Pseudomonas aeruginosa (strain UCBPP-PA14) GN=efp PE=3 SV=1	11727.9	12946.3	8909.09	8075.34	29795.9	31301.1	12068.5	12400.9	50073.8	54860.8	23158.7	25111.9	41155.8	42406.8	37663.1	41434.2	29797.2	30953.9	16115.8	15116.8	62139	65230.6	14944.5	14174.9	38567.8	34847	43384.5	46749.8	32400.4	33781.5	58886.8	56318.5
Q02EW3	8	2	43.8037	ATP-dependent protease ATPase subunit HslU OS=Pseudomonas aeruginosa (strain UCBPP-PA14) GN=hslU PE=3 SV=1	5335.39	5545.1	4331.41	6018.86	5532.9	6242.14	2999.03	4572.08	4056.8	4777.67	3012.33	3854.11	3071.78	3751.39	3899.25	3882.63	22733.6	24584.5	6023.17	5404.03	5575.81	5553.05	5112.43	6586.71	3961.71	3856.26	2684.52	2638.25	5013.23	5393	5159.2	6290.98
A0A0H2Z7J4	7	3	47.8514	SpcU OS=Pseudomonas aeruginosa (strain UCBPP-PA14) GN=spcU PE=4 SV=1	23974.5	19562.4	22904.8	21534.3	22961.2	21965.7	17017.5	15106.1	14274.7	14556	15134.8	15482.3	16273.8	16492.7	12001.4	12107	34037	31292.1	49416.5	48524.9	22423.7	22140.7	52986.8	52009.4	19562.9	17241	12683.3	12407.6	27308.7	24541.6	15185.8	13265
A0A0H2ZKI6	5	3	25.2363	Putative CBS domain OS=Pseudomonas aeruginosa (strain UCBPP-PA14) GN=PA14_03090 PE=4 SV=1	2305.51	3242.26	1814.93	467.282	3073.89	879.53	5076.61	5149.56	2670.99	2666.68	2757.56	2555.86	5572.15	3557.58	4211.75	3680.25	6341.11	6418.24	3983.85	4092.69	4981.62	2151.86	7790.52	4723.76	1403.08	2012.83	3320.84	2458.91	1232.26	1871.01	1635.7	1249.32
A0A0H2ZEA0	1	1	5.9866	Phosphonate metabolism protein OS=Pseudomonas aeruginosa (strain UCBPP-PA14) GN=phnM PE=4 SV=1	750.136	672.338	638.648	564.812	603.533	434.676	663.839	543.295	1006.79	1003.6	1409.25	917.318	1219.61	1068.93	1060.3	1287.75	1013.37	604.817	1411.53	971.854	1177.27	609.209	965.919	1205.88	1427.33	889.818	2318.77	1573.95	2225.98	1855.92	1274.6	1402.42
A0A0H2ZE94	34	13	190.272	Putative alkyl hydroperoxide reductase subunit OS=Pseudomonas aeruginosa (strain UCBPP-PA14) GN=ahpC PE=4 SV=1	203689	256998	63481.1	40313	118039	102085	115847	116002	303339	327245	207668	200669	322772	331896	239998	240346	267736	296369	292498	304857	379353	388720	342862	367333	147383	161883	235085	197835	225136	224025	183634	188106
Q02H08	6	3	41.3127	30S ribosomal protein S9 OS=Pseudomonas aeruginosa (strain UCBPP-PA14) GN=rpsI PE=3 SV=1	25401.5	25363.2	22908.4	22503	34953.4	32230.3	15666.2	14646.1	9109.21	9228.69	15696.5	16505.7	17305.4	17562.9	8103.36	7635	34388.7	34124.2	39175.5	36505.6	15994.3	16211.5	40441.3	37850.6	11012.6	10110.5	8274.11	7999.63	19292.2	20431.5	10481.8	10808.4
A0A0H2Z7A2	5	3	29.7058	Uncharacterized protein OS=Pseudomonas aeruginosa (strain UCBPP-PA14) GN=PA14_47420 PE=4 SV=1	8936.12	10014.1	2492.48	1833.82	9222.78	8451.59	8626.36	9405.16	10040.3	10368.1	10798	9955.15	18019.5	17027.4	10076.8	9642.42	14541.3	16477.2	19783.6	19824.1	12832	13892.7	26308.7	27421.9	7711.2	9472.67	13188.9	10134.5	17004.8	13387.4	8318.77	6964.83
A0A0H2ZFK7	12	2	97.5813	Histone-like protein HU form N OS=Pseudomonas aeruginosa (strain UCBPP-PA14) GN=PA14_12900 PE=3 SV=1	158809	183713	130869	150120	156363	154957	91898.3	92291.5	56706.7	65931.7	52298.5	55983.4	80184.9	74019.4	57246.5	52323.3	127265	138922	185826	176378	130109	121261	191820	193255	66582.2	57351.6	79360.6	77141	167030	164113	95298.6	74643.3
Q02GB1	5	1	29.7678	GTPase Obg OS=Pseudomonas aeruginosa (strain UCBPP-PA14) GN=obg PE=1 SV=1	266.667	211.35	73.3438	275.321	187.353	196.886	308.31	333.502	62.0419	27.3487	113.12	192.995	45.2441	118.572	101.241	123.397	98.1854	80.0712	57.967	250.592	48.8194	148.963	72.3927	150.185	77.1978	124.404	116.506	130.826	71.5796	45.5154	38.1599	121.183
A0A0H2ZJM2	18	9	136.454	Alcohol dehydrogenase, zinc-containing OS=Pseudomonas aeruginosa (strain UCBPP-PA14) GN=adhA PE=3 SV=1	18826.1	19820	20171.1	21557.5	26162.4	25925.2	16753.8	16451	53066	52173.7	38816.7	38076.7	51054.2	48213.2	40075.6	39798.5	45985	47205.8	53411.6	54443.6	55737.9	53131.2	56320.8	54408.2	39277.7	38598.3	40999	39427.1	59392.9	56475.9	49492.4	49267.8
A0A0H2ZBN7	3	1	15.0822	Thiol:disulfide interchange protein DsbG OS=Pseudomonas aeruginosa (strain UCBPP-PA14) GN=dsbG PE=4 SV=1	1151.39	1343.06	574.885	1232.62	429.184	816.597	1120.59	1032.26	518.025	461.131	390.741	477.798	401.681	449.536	335.075	431.045	316.363	354.95	350.483	656.22	459.491	475.365	567.148	656.455	465.422	413.751	342.365	333.989	267.086	320.403	470.177	425.431
Q02T54	3	1	17.6347	50S ribosomal protein L17 OS=Pseudomonas aeruginosa (strain UCBPP-PA14) GN=rplQ PE=3 SV=1	1019.32	1395.21	803.491	1084.61	4291.38	6749	1396.12	1580.58	4929.92	7149.8	4475.88	4334.47	7994.22	8575.23	4318.46	4336.3	4951.48	6345.02	1015.83	1419.87	11256.7	11428.5	1536.84	1321.3	4197.9	5082.99	4655.93	4062.41	3333.27	3272.08	7107.62	6458.83
A0A0H2ZBU9	22	9	135.149	Probable thiol peroxidase OS=Pseudomonas aeruginosa (strain UCBPP-PA14) GN=tpx PE=3 SV=1	45102.7	39665.6	42941	40022.2	35836.5	33355.3	25936.7	26179.8	14024.6	14168.6	13441.6	13336.4	16038.8	16311.2	14882	13576.8	23872.4	23560.5	30204.9	28485.2	31855.5	33512.4	42844.3	37120.5	13263.9	12546.4	14857.4	13926.8	26067.4	26260.1	17222	15398.2
A0A0H2Z9M5	39	17	240.166	Major porin and structural outer membrane porin OprF OS=Pseudomonas aeruginosa (strain UCBPP-PA14) GN=oprF PE=3 SV=1	512202	548852	1.07671e+06	1.13487e+06	557318	504190	243695	241395	445084	484836	329103	325872	168440	183097	149222	144910	438675	476136	649663	580410	1.05365e+06	1.04668e+06	651262	667337	305161	273969	176133	164260	243117	246250	462374	421911
Q02RW1	20	10	115.64	Nucleoside diphosphate kinase OS=Pseudomonas aeruginosa (strain UCBPP-PA14) GN=ndk PE=3 SV=1	20518.6	21269.7	18292.6	19846.9	14886.6	16301.2	14088.6	14997.5	27444.6	30314.6	16340	15217.3	19081.7	17247.7	16543.2	16441.3	36356.5	39634.3	37463.2	32665.2	51159.1	54454.9	49180.7	45729.9	20946.5	17490.7	21300.7	19510.9	22669.6	21143.3	27239.6	23300.8
A0A0H2ZEH5	9	4	72.7125	Putative thiol-specific antioxidant protein OS=Pseudomonas aeruginosa (strain UCBPP-PA14) GN=lsfA PE=4 SV=1	12022.4	15628.3	5490.96	2489.33	8586.81	7167.95	13125.3	13865.1	10145.7	11517.4	12892.1	12369.6	10385.9	11219.7	10745.6	10550.3	10758.1	12813.2	11742	12559.7	10747.7	12818.9	11797.5	13258.7	5016.88	5894.18	6601.88	5253.49	3627.67	4453.62	3769.75	4523.57
Q02TL9	20	12	129.434	S-adenosylmethionine synthase OS=Pseudomonas aeruginosa (strain UCBPP-PA14) GN=metK PE=3 SV=1	167671	172715	195217	209160	180852	173861	116046	109838	82535.2	75794.8	66895.7	62424.4	68856.1	69018.9	59109.6	54271.7	101950	103352	106365	99272.1	108221	104412	96423.8	99451.2	71675.6	67977.3	58605.7	58310.6	118494	115768	86740.8	98068.1
A0A0H2ZIR8	11	3	74.3752	Putative amino acid ABC transporter, periplasmic amino acid-binding protein OS=Pseudomonas aeruginosa (strain UCBPP-PA14) GN=PA14_67050 PE=3 SV=1	10554.6	20508.6	25246.1	27231.6	17849.6	9195.65	21766.9	16626	13761.6	15174.2	21418.5	17657.5	22429.7	13986.1	19466.4	10523.5	25499	33413.3	27475.6	26398.3	40080	29132.5	99448.3	46011.6	22845.4	20147.1	18247.2	9612.79	58311.4	32151.1	27378.9	18378.7
A0A0H2ZE84	4	3	14.6698	Beta-ketoacyl reductase OS=Pseudomonas aeruginosa (strain UCBPP-PA14) GN=rhlG PE=4 SV=1	2168.32	2954.13	851.128	552.494	1436.27	1377.37	2608.08	2517.41	2762.91	3326.71	3695.73	3588.69	3470.98	2683.28	3823.56	3190.3	3182.37	5097.57	3877.14	4538.4	5160.56	4937.94	4303.72	4117.99	1703.04	2730	2492.24	2031.75	2353.96	3057.48	2908.52	2568.84
A0A0H2ZIR1	10	3	51.2243	Putative methyl-accepting chemotaxis transducer OS=Pseudomonas aeruginosa (strain UCBPP-PA14) GN=PA14_67010 PE=4 SV=1	915.33	636.963	699.238	686.226	688.641	660.183	1354.52	1896.87	1489.57	1313.56	1924	1838.41	1274.55	1435.96	2221.75	1779.25	1299.32	1012.82	518.584	897.314	682.33	601.94	172.269	276.128	1761.18	2027.15	2239.68	1855.76	818.854	575.563	1428.31	1125.48
Q02DF0	26	10	178.823	ATP synthase subunit b OS=Pseudomonas aeruginosa (strain UCBPP-PA14) GN=atpF PE=3 SV=1	95798.3	103166	183037	175302	82417.4	73342.3	61381.2	60434.3	38550.8	62567.3	48308.5	48735	34347.2	34144.9	44726.1	43644	55652	64317.3	124058	108129	68642.8	77659.3	176090	183515	47829.4	49467.4	37072.6	33092.6	67143.8	66366.6	65806.2	45562.4
Q02T61	9	3	46.5295	50S ribosomal protein L15 OS=Pseudomonas aeruginosa (strain UCBPP-PA14) GN=rplO PE=3 SV=1	25944.7	23468.2	14009.5	15949.7	36352.6	29685.8	17068.9	15338.4	10496.1	10592.4	14452.1	15158.8	17976	17625.9	9782.19	9160.38	29563.9	32854.1	34357	35121.4	17635.8	16943.9	36042.1	34737.5	9836.71	10045.4	8123.85	8976.73	19209	19913.4	11645.5	10509.4
Q02K11	7	4	43.1401	Cell division protein ZipA OS=Pseudomonas aeruginosa (strain UCBPP-PA14) GN=zipA PE=3 SV=1	44771	52946.7	41424.1	40448.6	30757	32397.7	28419.2	29552.6	34914.5	40950	24494.4	25583.5	19649	21120.1	17659.8	16804.4	53595	59922.9	65997.3	67503	58868.4	58500.4	59104.3	62047.7	26705.6	26221.6	18912.2	18635.4	30831.6	31564	40865.8	35920.9
A0A0H2ZGH2	3	2	17.4464	Putative membrane protein OS=Pseudomonas aeruginosa (strain UCBPP-PA14) GN=mexG PE=4 SV=1	10103.2	11790.2	19821.7	20141.1	17983.6	16067.9	11140.3	10892.8	9638.14	8445.83	5545.15	5249.79	5044.33	5155.9	5598.67	5663	6456.83	6243.15	6095.76	5526.07	6887.34	7409.26	5572.32	5894.07	6302.8	5710.75	5825.88	6546.08	4182.46	5096.88	7312.25	7914.33
A0A0H2ZCG1	2	1	11.576	Uncharacterized protein OS=Pseudomonas aeruginosa (strain UCBPP-PA14) GN=PA14_27710 PE=4 SV=1	1206.53	1343.88	2077.38	1598.54	1053.81	649.294	1560.19	1384.42	2148.4	2307.03	2114.16	2005.35	1976.92	1638.67	1917.78	2108.18	1478.76	1741.54	1515.58	1510.43	429.016	615.618	628.588	922.888	2502.84	2816.1	2624.66	2946.8	3261.44	2545.84	2440.95	2116.41
Q02F74	5	1	29.3184	RNA-binding protein Hfq OS=Pseudomonas aeruginosa (strain UCBPP-PA14) GN=hfq PE=3 SV=1	7912.25	8866.73	7560.17	8768.43	9468.55	8317.36	5219	5521.44	5569	5729.44	4629	4700.88	5179.95	5402.3	4852.26	4649.01	10206.3	11718.9	11213.5	10803.5	7377.6	7925.69	16315.4	18528.7	4346.94	4013.04	3976.23	4427.52	6161.95	6630.89	4831.49	4783.95
Q02I31	7	2	40.8113	Putative pterin-4-alpha-carbinolamine dehydratase OS=Pseudomonas aeruginosa (strain UCBPP-PA14) GN=PA14_53000 PE=1 SV=1	10504.4	11043.6	2277.51	1062.87	2198.17	1840.17	8722.05	7209.42	6140.57	6322.61	4807.34	3720.12	7484.04	6683.05	8560.04	8697.34	6761.35	8495.82	3105.72	5004.08	7943.66	6200.25	15729.8	13426.9	2662.33	2692.94	8204.15	5422.82	3372.94	2272.55	1676.21	1488.85
A0A0H2ZAW8	6	1	30.7846	ATP-dependent clp protease, ATP-binding subunit ClpA OS=Pseudomonas aeruginosa (strain UCBPP-PA14) GN=clpA PE=3 SV=1	2007.91	3588.47	3642.42	2380.03	3248.5	2409.55	2508.82	2135.93	4523.25	4856.71	3647.5	3313.82	3946.6	3196.68	3650.93	2905.36	6680.87	6028.37	6662.42	7929.81	7520.47	3602.11	8808.99	5249.02	4783.71	3441.56	3638.47	4126.96	8247.17	6031.81	5065.63	3488.88
Q02K58	3	2	19.7169	UPF0345 protein PA14_44140 OS=Pseudomonas aeruginosa (strain UCBPP-PA14) GN=PA14_44140 PE=3 SV=1	2809.49	1701.89	3964.44	2682.73	3624.27	3456.75	3322.22	3204.69	5504.64	5745.48	4153.66	3852.38	5758.98	6234.91	4454.47	4989.86	3841.69	3101.54	1552.03	1404.62	4207.96	4330.88	897.554	1644.98	5745.32	4839.97	7174.97	6986.37	4984.46	5611.07	6750.24	8040.3
A0A0H2ZKV0	3	2	17.391	Putative fumarylacetoacetate hydrolase family protein OS=Pseudomonas aeruginosa (strain UCBPP-PA14) GN=ycgM PE=4 SV=1	848.201	1502.36	1546.06	1232.25	2078.83	1370.93	1520.88	1219.93	2337.95	2330.29	2033.8	2129.42	3875.3	2219.39	2923.44	1861.13	2227.57	1891.79	3487.39	2377.9	3878.6	2396.64	3200.74	2219.83	2659.72	2408.68	3603.31	2564.85	5693.76	3325.27	4034.92	2672.86
Q02T78	2	2	11.777	50S ribosomal protein L23 OS=Pseudomonas aeruginosa (strain UCBPP-PA14) GN=rplW PE=3 SV=1	1457.15	1054.35	708.346	587.738	2739.77	2360.49	1385.53	1091.67	3213.66	3716.41	2271.65	2553.53	4445.33	4744.42	3123.46	3038.35	2941.31	2924.07	556.729	559.014	4161.25	5413.61	852.793	694.869	2622.54	2771.2	3246.82	3265.55	1817.59	1885.13	4534.98	4262.72
A0A0H2ZGN7	28	13	166.533	Transcriptional regulator MvaT, P16 subunit OS=Pseudomonas aeruginosa (strain UCBPP-PA14) GN=mvaT PE=4 SV=1	198074	235128	129296	139640	180054	175845	100657	109325	115023	125584	88612.2	98359.7	142940	145931	99378.9	93482.6	199623	232736	266924	291374	236426	203965	366661	344860	104796	99261	120608	130993	218813	221744	148751	128125
A0A0H2ZCD7	6	1	30.2645	Cysteine synthase OS=Pseudomonas aeruginosa (strain UCBPP-PA14) GN=cysK PE=3 SV=1	0	1177.57	453.69	0	21.2878	171.335	1892.93	2888.62	510.191	550.921	2366.01	1970.63	1959.5	2326.68	1551.15	1447.65	788.646	4629.1	1847.45	1874.45	1034.01	402.72	2279.07	499.161	1083.71	1758.56	1345.47	133.806	486.585	392.946	469.598	0
Q02T63	10	5	65.3422	30S ribosomal protein S5 OS=Pseudomonas aeruginosa (strain UCBPP-PA14) GN=rpsE PE=3 SV=1	2390.2	3199.61	2806.63	2579.15	14929.5	14813.7	4722.21	4992.75	15599.7	20802.6	11074.1	11900.5	15699.2	16282.6	12607.1	14666.2	14617.9	15252.1	4055.12	4266.69	21857.5	23948.2	3550.59	3637.54	13885.5	13034.1	13983.1	14775.9	10222.1	11127.5	18069.2	17778.6
A0A0H2ZIT5	1	1	4.8307	Putative transcriptional regulator OS=Pseudomonas aeruginosa (strain UCBPP-PA14) GN=PA14_72890 PE=4 SV=1	1788.04	1709.74	2133.96	2323.18	1196.78	1282.11	1099.9	1098.38	480.38	656.17	518.032	561.988	910.959	817.184	681.16	766.633	628.901	1054.37	1358.16	1179.42	1068.16	766.003	1581.95	2273.24	751.725	576.966	645.097	689.498	1802.61	2388.47	1023.77	1120.4
A0A0H2Z804	4	2	27.1256	Cbb3-type cytochrome c oxidase subunit OS=Pseudomonas aeruginosa (strain UCBPP-PA14) GN=ccoP PE=3 SV=1	1460.39	1348.85	2649.02	1949.76	1839.66	2021.19	1496.65	1884.38	5014.43	5492.7	5865.15	5538.91	2826.28	2524.71	3630.21	3256.08	2067.85	2235.87	3855.52	3994.25	4618.32	3612.46	4188.25	3243	6474.45	5093.11	2171.13	2197.58	2544.3	2485.11	6116.47	5873.62
Q02T75	5	1	43.3856	50S ribosomal protein L22 OS=Pseudomonas aeruginosa (strain UCBPP-PA14) GN=rplV PE=3 SV=1	320.622	81.5832	223.631	176.406	436.727	411.659	323.023	551.332	705.991	565.653	359.182	543.791	1149.03	1188.2	781.101	559.85	179.587	239.043	57.059	164.332	1016.36	647.317	81.7379	145.073	701.63	514.993	576.955	784.668	88.8349	197.344	705.827	792.746
A0A0H2ZJ53	6	1	45.0264	Polyphosphate kinase OS=Pseudomonas aeruginosa (strain UCBPP-PA14) GN=ppk PE=3 SV=1	1455.57	1800.95	4604.4	3230.69	3314.57	2724.94	1677.3	2210.78	1534.77	1768.03	1871.3	1511.82	478.245	464.193	1174.87	1166.4	758.266	828.519	873.504	1136.49	3690.77	1958.35	830.351	1322.49	2120.31	1787.89	376.257	653.314	437.171	524.201	1718.3	1495.41
Q02GZ2	3	1	16.8609	ATP phosphoribosyltransferase OS=Pseudomonas aeruginosa (strain UCBPP-PA14) GN=hisG PE=3 SV=1	569.693	702.433	326.931	423.541	598.766	371.698	265.769	351.927	525.736	616.376	692.053	575.962	761.343	757.093	466.192	657.587	986.982	1021.19	1118.07	1023.39	1122.24	828.981	798.136	1426.26	593.359	666.022	820.333	824.999	1039.41	1197.72	1268.52	660.056
A0A0H2ZHV4	17	7	101.257	Ribose-phosphate pyrophosphokinase OS=Pseudomonas aeruginosa (strain UCBPP-PA14) GN=prs PE=3 SV=1	8260.52	9100.14	3096.1	3030.42	11240.3	10225.9	7335.14	7988.96	18183.8	19192.8	13359.7	13750.5	17684	18131.8	15454.4	15712.5	16139.1	17005.4	13517.4	11932.8	25941.8	25329.2	15082.3	13853.7	11834.4	13130.4	14699.5	14007.4	11777	11627.8	17736.3	16868.6
A0A0H2Z823	55	23	368.846	Succinate dehydrogenase flavoprotein subunit OS=Pseudomonas aeruginosa (strain UCBPP-PA14) GN=sdhA PE=3 SV=1	123893	163313	94738.5	49751.4	117589	99488.9	134832	132676	136651	141856	155295	138525	146418	138890	144217	144525	208246	254085	196050	217486	240414	218454	267479	251071	90753.6	125061	119678	102912	84081.1	87279.9	95143.4	101107
A0A0H2ZJN2	4	2	15.8596	Putative short chain dehydrogenase OS=Pseudomonas aeruginosa (strain UCBPP-PA14) GN=PA14_72840 PE=4 SV=1	1605.1	1620.35	2407.93	2367.53	1629.15	1291.11	1230.27	1260.81	9.35716	1014.83	762	854.732	640.78	498.35	959.687	1112.74	0	933.978	2104.31	1755.6	459.931	504.718	1908.38	2080.07	764.088	994.754	1260.03	540.764	995.137	1038.5	774.626	0
Q02H15	2	1	11.4584	Phosphoheptose isomerase OS=Pseudomonas aeruginosa (strain UCBPP-PA14) GN=gmhA PE=1 SV=1	368.258	500.4	382.554	553.707	897.333	538.233	405.531	299.834	331.057	353.916	246.784	238.202	321.757	214.542	364.106	240.794	500.583	352.377	631.734	773.872	705.933	576.648	766.452	981.739	291.906	247.856	365.761	333.259	521.979	218.493	477.234	351.645
A0A0H2Z8U8	11	5	66.0916	Putative two-component sensor OS=Pseudomonas aeruginosa (strain UCBPP-PA14) GN=cheA PE=4 SV=1	4324.97	4714.12	5666.89	5579.08	5351.65	4764.72	5897.55	6246.91	7412.27	7718.95	8163.06	7629.74	9333.06	8306.6	8978.16	7922.96	11869.5	11896.9	12133.3	11273.2	11930.8	11962.6	12810.7	12690.2	7074.92	7385.13	7954.86	6912.07	10529.6	9983.28	8229.1	6458.74
A0A0H2ZIN7	21	3	143.208	Carbamate kinase OS=Pseudomonas aeruginosa (strain UCBPP-PA14) GN=arcC PE=3 SV=1	17915.6	18209.1	17885.5	21824.5	19506.7	18953.1	12270.6	12068.4	22844	21107.4	16629.1	15742.5	22656.5	22132.5	20393.6	19997.4	34976.9	32886.8	37918.9	35555.5	38236.7	37236.8	53335.8	44338.3	18604.9	17153.7	20259	19312.3	37206	43782.3	27621.4	26428.6
Q02GA9	11	5	80.3375	50S ribosomal protein L21 OS=Pseudomonas aeruginosa (strain UCBPP-PA14) GN=rplU PE=3 SV=1	12778.5	9513.09	4564.65	3807.65	17269.6	19227.4	8238.14	8763.53	24674.3	23305.7	15935.7	15186.4	21388.7	22942.4	15238.9	14719.6	31657.2	29768.3	18836.5	16749	32077.3	27317.4	19069.6	15046.7	21275.4	18705.3	16477.4	17082	16798	13287.6	17872.3	19541.6
Q02T77	16	8	93.4507	50S ribosomal protein L2 OS=Pseudomonas aeruginosa (strain UCBPP-PA14) GN=rplB PE=3 SV=1	13720.4	14603.6	9245.73	9351.02	29721.8	31039.1	13422.6	14593.7	9965.49	11556.1	18115.1	18362.2	20501.7	21681.9	10969.8	10910.9	41599	41159.7	41219	40045.9	12935.5	13114.6	43686.1	42516.9	14599.1	13742.5	13333.2	12364.3	21931.8	25790.2	12560.7	12747.4
A0A0H2ZGH1	12	4	65.2744	Putative methyl-accepting chemotaxis protein (MCP) OS=Pseudomonas aeruginosa (strain UCBPP-PA14) GN=PA14_61300 PE=4 SV=1	2725.93	1892.95	1715.6	1737.95	843.542	859.877	1743.88	1511.25	2760.02	2473.62	3340.53	2259.58	2542.52	2921.7	2950.26	2694.11	4268.14	2515.44	3160.16	4079.59	5880.36	4716.06	1593.95	3195.53	2777.47	2337.09	3092.79	3187.49	3558.62	3890.14	2638.78	3160.9
A0A0H2ZGK0	19	6	133.454	Putative universal stress protein OS=Pseudomonas aeruginosa (strain UCBPP-PA14) GN=PA14_56590 PE=3 SV=1	14978.2	13085	12991	16625.5	14096.6	15431.3	11036.3	9477.18	25590	24678.5	18213.8	17993.6	27352.2	22498.7	21707.7	20688.9	30152.4	27834.6	31655.2	29053.3	31095.8	31867.4	31949.5	28763.2	18766	17528.5	22562.6	18778.1	41389.6	36055.8	29080.7	24965.7
Q02PG5	20	7	104.195	Glyceraldehyde-3-phosphate dehydrogenase-like protein OS=Pseudomonas aeruginosa (strain UCBPP-PA14) GN=gap2 PE=1 SV=1	19285.2	17925.9	24819	23641	19985.5	19911.8	16290.7	16581.2	8153.6	9055.1	9204.62	9299.06	8981.77	9405.32	8053.28	8279.91	9666.27	12260.2	17280.3	18808.7	10617.5	11892.4	25410.7	28854.2	9951.69	8676.34	7450.44	6932.52	12074.9	11572.6	9722.29	9193.63
Q02TY0	20	6	126.787	Adenosylhomocysteinase OS=Pseudomonas aeruginosa (strain UCBPP-PA14) GN=ahcY PE=3 SV=1	34838.2	35072.2	27954.6	22617.4	35152.4	32125	22824.8	20398.9	16979.7	16179.5	14490.4	13805.6	23782	18008.7	15629.9	15180.5	11100	11101.9	13919	13306.5	14413.7	11923.9	13665.3	13515.7	14220.6	14182.7	19894.8	18565.4	42080	31188.7	20497.3	16989.7
A0A0H2ZGP4	9	6	75.4619	Ubiquinol-cytochrome c reductase iron-sulfur subunit OS=Pseudomonas aeruginosa (strain UCBPP-PA14) GN=PA14_57570 PE=4 SV=1	22241.8	21427.8	18057.8	18433.4	19126.3	18539.7	16180.4	15144	34481.6	38800.5	32882.2	33813.8	39493.1	38435.3	32399.1	30841.1	33289.7	36494.2	45279	45497.9	36627.3	35813.3	51915.3	49102.8	34755.6	33150.9	36660.7	35891.4	54938	53679.8	42583.7	39857.1
A0A0H2Z9D9	93	36	624.401	Chaperone protein HtpG OS=Pseudomonas aeruginosa (strain UCBPP-PA14) GN=htpG PE=3 SV=1	212485	269568	316471	311334	158746	150731	143131	152171	91788.2	102587	95752.6	96346.9	96190	104609	93231.9	89545.6	197272	216474	211445	207418	121506	126651	246007	252180	83595.8	85365	93257.5	93678.7	136976	158237	87863.6	84473.6
A0A0H2ZGD4	8	4	51.1161	Single-stranded DNA-binding protein OS=Pseudomonas aeruginosa (strain UCBPP-PA14) GN=ssb PE=3 SV=1	6984.72	8546.02	5275.61	5907.47	8721.93	11344.6	5141.13	5410.68	16308.4	15605.9	12284.3	12106.3	11487.4	14250.8	11939.3	12862.5	14823.3	12608	9344.89	10493.3	19688.4	19424.9	6897.56	8551.02	12822.9	12123	14386.9	14358.6	17763	16844.3	18420.5	20422.2
A0A0H2ZHU3	8	3	41.1656	Outer membrane protein assembly factor BamE OS=Pseudomonas aeruginosa (strain UCBPP-PA14) GN=omlA PE=3 SV=1	5860.1	8586.12	4931.07	4455.62	4010.91	3740.81	10541.7	10430.6	8022.13	8381.72	11671.2	12193.5	6719.87	6628.79	8324.36	7280.19	9605.43	9296.08	10255.4	10679.8	12714.4	13144.1	25832	24958	6894.73	7235.65	6439.21	4978.67	8621.61	9053.29	7780.66	6338.49
A0A0H2ZET1	12	2	61.5721	Threonine synthase OS=Pseudomonas aeruginosa (strain UCBPP-PA14) GN=thrC PE=4 SV=1	354.225	351.636	106.148	79.4557	398.59	494.514	493.609	503.063	631.52	587.67	445.508	404.574	1358.65	1230.62	822.224	676.263	784.034	669.174	496.935	520.79	296.88	237.217	271.51	192.127	567.278	589.342	696.125	619.199	957.611	944.421	863.441	633.188
A0A0H2ZJ52	14	8	96.0155	Putative DNA-binding protein HU family OS=Pseudomonas aeruginosa (strain UCBPP-PA14) GN=hupA PE=3 SV=1	21178.8	19994.7	8947.7	10000.1	48886.4	42984.3	26620.8	26262.1	46803.9	43096	41217.3	39893	73773.8	66385.6	37796.3	33242.1	84433.5	90965.7	48197.3	47595.7	62246.6	62885.1	26975.8	29743.3	31028.1	31928.2	24850	24001	48308.9	42386.5	28073.7	19781.4
A0A0H2ZIL8	25	9	158.324	Putative ABC transporter, periplasmic amino acid-binding protein OS=Pseudomonas aeruginosa (strain UCBPP-PA14) GN=PA14_68070 PE=3 SV=1	20473.8	29733	36359.7	16631.1	16141.2	14466.1	19869.8	17078.5	9738.22	11342.6	6163.43	6299.5	12252.8	13343.2	9080.03	9711.88	6851.54	7083.5	9495.01	12305.1	9890.88	12287.3	15717.8	14137	7748	6452.76	10438.4	11042.7	11327.1	11175.8	12916.3	12862.4
Q02RC5	15	4	95.7363	Ribosome-recycling factor OS=Pseudomonas aeruginosa (strain UCBPP-PA14) GN=frr PE=3 SV=1	8098.3	11292.5	13958.4	14302.7	16275.2	19268.4	8896.15	10031.9	30124.9	33814.2	15854.9	16083.9	28191.1	29100.4	26251.5	26709.3	14234.8	18788.7	12852.3	11924.3	35276.1	33814.7	11285.3	10797.9	23534.3	21406.3	30667.4	29059.4	20763.6	21764.1	38776.6	37531.7
A0A0H2ZFJ6	5	1	31.6182	Probable acetyltransferase OS=Pseudomonas aeruginosa (strain UCBPP-PA14) GN=PA14_11750 PE=4 SV=1	244.898	331.56	446.754	875.603	677.627	687.411	504.172	520.562	88.8514	191.283	305.596	468.233	221.711	306.65	292.829	224.241	121.911	223.067	196.46	308.945	81.0977	249.945	494.395	431.427	279.189	208.226	203.491	314.286	138.391	206.686	338.029	271.908
A0A0H2Z7G7	33	14	229.534	Basic amino acid, basic peptide and imipenem outer membrane porin OprD OS=Pseudomonas aeruginosa (strain UCBPP-PA14) GN=oprD PE=4 SV=1	83004.9	85973.2	127485	102563	77614.8	72621.8	46862.5	45660.1	137304	147246	72233.6	69209.3	77177.5	80448	72929.6	65661.6	157964	156912	189753	149774	198569	174365	186099	177112	98853.5	100406	86906.2	81640.2	76299	72850.3	141271	135883
A0A0H2Z8F8	5	2	28.8768	Putative outer membrane protein OS=Pseudomonas aeruginosa (strain UCBPP-PA14) GN=ompP1 PE=4 SV=1	1645.74	2297.05	6529.97	4987.94	2372.24	2113.26	2174.75	2445.55	1512.62	1959.43	1956.42	1953.49	1164.13	1341.19	1526.09	1364.5	1341.14	1469.7	2145.64	1651.16	1557.42	1836.49	739.359	608.674	1989.97	2014.26	2085.65	2439.28	1332.56	1588.11	2474.79	2469.17
A0A0H2Z9V8	20	8	144.366	Putative universal stress protein OS=Pseudomonas aeruginosa (strain UCBPP-PA14) GN=uspA PE=4 SV=1	39600.9	48385.4	40172.3	41228.5	41737.1	41503.7	26298.6	27457	67572	73638.6	50369.3	50324	68417.2	68546.4	57231.2	52436	75174.1	84942.3	89724.8	88455	90072.5	90644.7	70479.4	71938.2	45750.3	50721.8	55424.7	54374.3	92211.8	91578.8	73093.5	61699.7
A0A0H2ZHX0	6	4	38.9471	Ferric uptake regulation protein OS=Pseudomonas aeruginosa (strain UCBPP-PA14) GN=fur PE=3 SV=1	1377.92	1829.78	1878.52	1552.01	3066.7	3542.45	2010.9	2517.58	3780.55	5158.12	3464.09	3229.06	5103.38	5324.22	4072.81	4186.39	3121.45	3029.54	1828.23	1466.27	5719.73	6566.84	1937.33	1578.9	3769.45	4169.6	5662.89	5172.25	4333.42	4773.65	5740.62	4616.38
Q02T91	16	4	108.967	50S ribosomal protein L11 OS=Pseudomonas aeruginosa (strain UCBPP-PA14) GN=rplK PE=3 SV=1	62765	55630.1	64858.9	63982.6	55250.7	54292.5	42201.4	46907.5	28162.4	27307.3	23867	22220.2	30949.7	27626.4	24619.2	23057.4	34955.4	42591.1	46837.5	42949.1	61746.8	47521.5	57462.8	58875.5	29902.2	29351	29172.2	26679.4	57872.9	42053.5	32023.5	29453
Q02KR3	7	4	40.8683	Putative 4-hydroxy-4-methyl-2-oxoglutarate aldolase OS=Pseudomonas aeruginosa (strain UCBPP-PA14) GN=PA14_41640 PE=1 SV=1	15257.7	14719.1	15031.1	26200.3	11342.7	11764.4	10142.4	9130.71	17408.5	19298.9	12389.4	11953.6	16692.7	17846	13756.5	14455.4	16554.9	22004.2	35014.5	30376.4	27430.5	26065.1	40936.5	45166.5	10772.7	11912.6	14777.7	14239.2	21059.3	22208.8	20905.4	19170
A0A0H2Z6H5	2	2	8.7269	Uncharacterized protein OS=Pseudomonas aeruginosa (strain UCBPP-PA14) GN=PA14_55090 PE=4 SV=1	896.156	1648.76	2465.81	2595.87	1407.16	2550.15	993.177	963.387	2579.53	1356.54	1567.62	1619.63	2570.8	2513.66	1702.85	1508.72	949.993	1953.5	3597.84	3518.66	2723.89	2584.07	5550.03	7962.89	1242.71	1999.85	1548.35	2021.85	2685.41	3861.15	3746.21	5582.35
Q02F80	31	17	197.614	Adenylosuccinate synthetase OS=Pseudomonas aeruginosa (strain UCBPP-PA14) GN=purA PE=3 SV=1	142193	169908	130021	125672	105545	113390	88309.3	97431.2	88859.5	90477	68419.1	69423.7	79878.1	81608.1	71960.5	70320.5	121139	116662	151443	158187	158481	155419	244637	218293	61362.1	70338.2	72139.2	75675	113682	126568	87015.2	92141.2
A0A0H2ZKF3	2	1	12.5409	Protease PfpI OS=Pseudomonas aeruginosa (strain UCBPP-PA14) GN=pfpI PE=4 SV=1	1670.04	1083.3	1040.89	632.169	267.066	388.16	1383.64	1159.39	157.957	161.204	581.258	358.514	1115.79	730.98	321.817	149.334	884.761	584.698	1023.32	653.07	832.605	635.667	1039.49	697.801	331.037	304.887	713.156	672.677	659.066	451.851	400.397	299.666
A0A0H2ZDS6	29	10	201.276	Putative ABC transporter, periplasmic substrate-binding protein OS=Pseudomonas aeruginosa (strain UCBPP-PA14) GN=PA14_21960 PE=4 SV=1	25655	23390.2	26576.1	21632.4	25632.2	22555.2	14272.8	18220.4	38394.9	37346.9	24123.4	24155.8	37721	37725.5	32583.3	30920.7	22132	22099.7	17373.7	14928.8	23761.3	19809.4	16523.1	14137.5	37014	32274.5	40588.2	42200.7	44580.2	43462.9	41072.7	39575.4
A0A0H2ZA13	3	1	21.1138	Putative ATP-binding component of ABC transporter OS=Pseudomonas aeruginosa (strain UCBPP-PA14) GN=PA14_34500 PE=4 SV=1	1856.83	2339.24	714.034	1299.84	3042.3	1953.32	1838.82	1852.44	56.5418	6790.03	2938.7	3257.09	4375.78	4729.35	4415.7	4791.48	80.9885	4253.35	1956.33	1975.8	5804.58	5115.17	1599.04	3232.06	3343.47	4722.92	5833.08	3176.53	3988.62	4357	5517.5	58.9924
A0A0H2ZGV2	16	4	94.8685	Putative binding protein component of ABC transpor OS=Pseudomonas aeruginosa (strain UCBPP-PA14) GN=PA14_58350 PE=4 SV=1	27250.5	34349.1	44762.7	46443.1	30782.1	28846.1	22427.4	23138.4	64859.1	63965.7	33187.7	35230.8	22686.5	27054.3	23452.1	25306.7	65523.8	66062.4	55394.7	50835.7	115486	126970	30460.5	31765.5	49186.9	42905.5	40233.9	42138.9	32915.2	35812.9	61109.2	58066.7
A0A0H2Z9H8	25	17	107.835	DNA-binding protein HU OS=Pseudomonas aeruginosa (strain UCBPP-PA14) GN=hupB PE=3 SV=1	205845	204885	90156.1	97632.5	499809	430403	194314	189288	377902	403455	317445	303833	503864	449109	348053	305369	664460	637378	477522	421601	633196	564693	300467	313095	313299	302626	317245	310253	596277	484383	434613	349773
Q02ND0	20	4	121.753	NADH-quinone oxidoreductase subunit B OS=Pseudomonas aeruginosa (strain UCBPP-PA14) GN=nuoB PE=3 SV=1	45609.7	42007	71614.8	69566.9	39587	37809.9	42733	37417.4	31946.5	31665.6	27228.6	24671.2	17211.1	15507.7	17721.7	18358.4	25722.5	27956	28776.3	35751.5	67159.1	54425.3	40587.2	41388.3	29050.2	28220.9	22768.4	20126.5	23285.8	21654.6	29795.2	26268
Q02DF1	15	6	113.989	ATP synthase subunit delta OS=Pseudomonas aeruginosa (strain UCBPP-PA14) GN=atpH PE=3 SV=1	65959.4	94809.8	46686	27544.2	35164.6	28419.2	59400.8	57460.3	75227.4	85038.1	77655.6	76955	88361.4	76836.7	106888	88076.7	97069.7	117170	119173	118858	87316.2	73269.4	137732	119288	57805.7	79294.1	96084	91780.5	120187	98702	57074.4	52288.8
Q02EZ9	3	3	14.8897	Peptide methionine sulfoxide reductase MsrA OS=Pseudomonas aeruginosa (strain UCBPP-PA14) GN=msrA PE=3 SV=1	7603.01	5911.27	4629.28	2148.15	6366.96	5426.82	5443.27	5258.9	11764.3	10692	9124.11	8686.87	10159.2	11248.8	9900.88	9698.69	9103.22	8420.73	9413.51	7953.23	11556.8	11740.2	8620.1	5517.39	9614.86	9809.87	12320.5	11388.1	10414	10826.3	11682.1	13429.2
A0A0H2ZL24	9	3	51.165	Cystathionine beta-synthase OS=Pseudomonas aeruginosa (strain UCBPP-PA14) GN=PA14_05220 PE=4 SV=1	10593.3	17166.2	7235.98	12724.3	9255.18	10929.2	5009.31	4469.48	3167.87	10786.9	4408.55	5162.36	6710.73	7064.16	6083.66	5592.1	4678.66	13411.4	14484.4	11864.5	15879.4	14029.7	11942.3	15891.7	7174.44	6402.4	5807.99	5615.41	12768	12725.8	9250.51	2608.27
A0A0H2ZDK9	19	5	117.931	Aspartate-semialdehyde dehydrogenase OS=Pseudomonas aeruginosa (strain UCBPP-PA14) GN=asd PE=3 SV=1	16905.9	19401.5	27558.5	27833.1	15011.5	15455.8	13515.3	14421.1	16927.2	18564	13347.6	13292.3	13085.3	16115.6	13539.3	13367.8	43022.1	46116.1	28099.9	23237.5	29154.6	30442.6	21639.8	23866.1	13996.2	13521.1	11309	12427.5	22772.6	24433.1	15912.7	18127.7
A0A0H2ZDQ2	26	13	150.795	Uncharacterized protein OS=Pseudomonas aeruginosa (strain UCBPP-PA14) GN=PA14_21220 PE=3 SV=1	53519.1	48226.4	49197.5	49737.9	50338.2	49079	28331	29565.8	83652	87246.5	62128.2	66186	79357.4	91797.8	69844.2	69052.4	84027.8	77944.4	96850.9	90811	111546	111915	79261.9	90283.5	68227.1	58554.9	79153.3	78754.2	94734.4	104899	99680.6	96376
A0A0H2Z7U0	20	9	158.543	Two-component response regulator PhoP OS=Pseudomonas aeruginosa (strain UCBPP-PA14) GN=phoP PE=4 SV=1	94185.2	109267	70327.4	72932.3	68924.2	70533.9	62457	67506.1	50352.6	54296.3	40269.5	39181.8	65738.4	65922.9	51794	49195.2	77662.4	87033.2	77384.8	81742.4	143920	137365	134023	124483	47736.5	46640.4	55358.6	55915.5	101690	100720	69927.8	63182.7
Q02T71	3	2	13.0947	30S ribosomal protein S17 OS=Pseudomonas aeruginosa (strain UCBPP-PA14) GN=rpsQ PE=3 SV=1	2500.76	4001.68	4046.16	2062.39	10973.7	10110.2	4455.63	4187.31	12421.9	15613.4	7769.32	7887.42	11402.1	12165	10525.3	9710.92	7959.09	11818.1	5138.78	5615.14	14359.5	15335	3165.39	3388.73	8988.3	9644.6	11596.8	11058.4	6308.45	6672.7	14899.9	14764.2
A0A0H2Z9C6	17	4	85.6027	Citrate synthase OS=Pseudomonas aeruginosa (strain UCBPP-PA14) GN=gltA PE=3 SV=1	9550.39	9797.12	14185	16734.8	19308.2	16512.1	9440.23	8895.99	8239.38	8809.18	8197.46	8309.81	4510.61	4536.17	5882.63	7043.82	6234.88	5281.9	6627.26	6885.51	12045.4	13961.9	8052.44	8975.99	6671.87	5911.98	3723.67	3780.32	4362.47	4100.34	10601.1	11403.6
A0A0H2Z7L7	9	6	48.3133	Bacterioferritin comigratory protein OS=Pseudomonas aeruginosa (strain UCBPP-PA14) GN=bcp PE=4 SV=1	6543.62	6596.27	8189.5	8322.61	8325.44	8443.28	4839.78	5932.62	13810.8	15075	11746.4	11376.7	12913.7	13299.9	12166.8	11443	13524.8	12340.6	14203.1	12518	16994.5	16720.7	13606.8	16175.5	10552.9	10521.9	11135.2	9771.84	14009.2	15667.7	13556.1	14134.1
A0A0H2ZFA6	29	16	178.428	Uncharacterized protein OS=Pseudomonas aeruginosa (strain UCBPP-PA14) GN=PA14_13140 PE=4 SV=1	102267	103155	88733.1	62464.9	88938.8	83192.8	81711.7	81685.7	156467	172332	129753	128188	136542	145773	149480	153838	163406	177116	167576	164713	201237	201044	129272	137714	127645	150640	205905	186556	186818	194729	169481	168989
Q02T65	16	9	94.2388	50S ribosomal protein L6 OS=Pseudomonas aeruginosa (strain UCBPP-PA14) GN=rplF PE=3 SV=1	66506.2	85091.4	42556.6	47358.7	60963.1	65145.8	45609.2	48285.1	40254.9	48570	43480.5	41677.7	53427.1	57942.5	40213.4	40419.1	72142.5	85668.8	98531.6	95940	76014	78775.3	105703	122596	29999.8	33798.8	37274	33196.5	66898.8	73318.3	48210	48023.4
A0A0H2ZGR2	18	9	110.122	Uncharacterized protein OS=Pseudomonas aeruginosa (strain UCBPP-PA14) GN=PA14_62230 PE=4 SV=1	11911.4	7439.62	11731.9	15483.7	14424.2	12809.2	10043.2	11260.5	7114.93	5148.56	6616.16	6787.64	5677.39	5129.9	6026.31	5631.64	8760.55	7495.3	8238.06	8407.55	9132.44	9099.17	5961.17	5848.43	6420.84	5831.44	4676.85	4442.47	7314.42	6218.56	6489.49	6125.79
Q02E40	12	5	65.4503	Phosphomannomutase/phosphoglucomutase OS=Pseudomonas aeruginosa (strain UCBPP-PA14) GN=algC PE=1 SV=2	11203.5	14410.2	18886.4	21004.1	13893.1	12515.3	8441.96	9210.01	7403.67	7865.05	6381.2	7228.84	6298.7	7160.67	6016.58	6459.77	8348.74	8541.62	13301.2	10967.1	8889.18	9215.27	13517.3	15008.2	6916.36	6672.6	6049.13	5589.03	8802.93	8600.66	8461.35	8533.81
A0A0H2Z6Y0	11	5	74.6986	Probable cold-shock protein OS=Pseudomonas aeruginosa (strain UCBPP-PA14) GN=PA14_49410 PE=4 SV=1	63605.1	64330.7	47741.1	51546	46966.5	40938.9	37357.6	38778.9	33085.4	34656.9	24712	24746.4	38181	43876.6	23869	23297.1	27299.4	30592.1	19210.4	18229.5	34699.6	37891.6	13228.2	15398.2	21938.4	23175.8	22199.3	22874.7	24468.9	28513	32290	34450.8
Q02G63	5	3	37.9985	Large-conductance mechanosensitive channel OS=Pseudomonas aeruginosa (strain UCBPP-PA14) GN=mscL PE=3 SV=1	3807.9	5927.1	9415.6	7753.11	12076.9	14222	8974.26	10284.8	7753.66	8864.57	10286.1	10487.7	2139.46	2436.01	8047.69	6678.72	4665.19	6304.25	7894.98	8359.03	28838.4	24743.6	9331.05	6986.23	7697.13	11030.5	2261.47	2946.32	2268.12	2537.64	10085.8	10096.8
Q02E25	2	1	13.0098	DNA-directed RNA polymerase subunit omega OS=Pseudomonas aeruginosa (strain UCBPP-PA14) GN=rpoZ PE=1 SV=1	1518	1745.46	660.627	640.781	5951.19	5571.03	1913.94	2546.29	5462.96	6434.7	3418.5	3230.38	6319.77	6510.84	4731.11	4565.41	4136.16	5345.53	1957.94	3308.6	10227.6	10049.7	1144.22	1332.3	4039.65	3744.29	4548.14	4388.86	4230.59	4369.58	6907.56	6234.06
Q02DE8	6	3	32.7526	ATP synthase subunit a OS=Pseudomonas aeruginosa (strain UCBPP-PA14) GN=atpB PE=3 SV=1	3215.37	3526.33	4678.46	4351.55	8519.22	9219.83	6786.34	7561.26	16483	16930.1	15687.7	16167.6	4932.98	5419.41	9420.14	9617.91	5657.56	5271.58	5734.86	6096.81	20735.1	20771.5	4886.2	5891.45	11544.9	14572.9	3657.9	4025.47	2929.7	3662.44	14461.8	15620.2
A0A0H2ZIU8	9	1	65.9574	Glyoxalase OS=Pseudomonas aeruginosa (strain UCBPP-PA14) GN=elbB PE=3 SV=1	2801.14	2853.91	1358.5	1320.91	2396.62	2071.14	1331.85	1295.6	2900.6	2149.51	2271.73	2067.98	3448.41	3141.08	2496.99	2448.18	1972.94	1882.78	4068.95	3456.41	3361.65	3148.27	5958.54	6369.14	2131.09	1421.02	2346.65	2288.5	4272.32	3189.91	4055.58	2951.27
Q02H34	13	2	81.0896	UDP-3-O-acyl-N-acetylglucosamine deacetylase OS=Pseudomonas aeruginosa (strain UCBPP-PA14) GN=lpxC PE=3 SV=1	4223.48	5989.85	6229.64	3898.71	5314.37	5099.78	3474.42	2451.88	2570.21	2875.6	2314.53	1856.54	2744.81	2352.78	2030.09	2018.68	3918.7	3868.87	4291.8	3883.22	3386.01	2458.21	3755.78	4286.89	2650.91	2147.43	2999.42	1978.19	3631.11	3363.34	3879.96	2545.79
A0A0H2ZE27	11	5	62.1079	Uncharacterized protein OS=Pseudomonas aeruginosa (strain UCBPP-PA14) GN=PA14_14900 PE=4 SV=1	5085.35	4965.27	7757.83	8068.61	6534.48	5658.05	5261.24	5165.9	5162.87	5419.4	5313.21	5506.37	4740.64	4933.36	5270.55	5040.13	20790.8	24887.2	6138.69	6774.55	4716.3	5500.97	6136.39	5943.42	5464.19	4999.28	4571	5102.12	6027.57	5837.8	6096	5713.35
A0A0H2ZJ38	12	4	56.603	Aminopeptidase P OS=Pseudomonas aeruginosa (strain UCBPP-PA14) GN=pepP PE=4 SV=1	2320.91	3488.36	1985.25	773.524	2263.74	2626.16	2652.8	2597.85	5172.44	5142.63	4355.3	4322.12	4775.63	4338.28	4447.36	3929.3	2972.96	3268.8	2371.56	3029.19	2999.27	4264.94	3140.74	3806.63	3899.51	4333.99	4739.78	4159.07	3472.94	3464.36	4691.78	4789.6
A0A0H2ZHW6	15	6	98.669	Transcription elongation factor GreA OS=Pseudomonas aeruginosa (strain UCBPP-PA14) GN=greA PE=3 SV=1	7784.64	6877.77	8182.76	5579.19	8698.37	11671.5	6211.51	6918.76	14887	16462.3	10351.5	10625.1	14791.7	16966.9	12763.8	11426.5	11683.8	12067.5	11497	11711.6	17777.7	17169.8	7309.45	8754.11	11532.1	11118.7	15131.1	14518.4	17577.6	16830.1	15703.7	18182.3
A0A0H2ZG92	22	4	137.462	Chemotactic transducer PctA OS=Pseudomonas aeruginosa (strain UCBPP-PA14) GN=pctA PE=4 SV=1	499.084	529.167	588.753	657.229	342.009	569.203	521.476	442.042	687.347	745.764	674.192	677.202	318.999	383.259	524.269	524.764	1002.51	1445.59	1529.84	1227.1	1074.02	539.417	473.187	576.959	655.332	484.641	412.451	360.91	487.148	479.11	608.929	556.996
Q02T88	10	4	45.8776	50S ribosomal protein L7/L12 OS=Pseudomonas aeruginosa (strain UCBPP-PA14) GN=rplL PE=3 SV=1	3247.53	3289.07	3286.16	4988.66	7445.25	5519.65	2700.3	3740.33	7449.74	7437.42	5925.51	5861.53	7354.17	10001.3	7654.77	8577.77	5787.89	5467.6	2889.3	2773.98	4356.12	7139.64	1890.94	1516.22	7327.63	6456.91	10450.3	12667.2	4304.8	5355.52	7546.38	7679.3
A0A0H2ZJ18	15	3	94.5735	Cytochrome c5 OS=Pseudomonas aeruginosa (strain UCBPP-PA14) GN=cycB PE=4 SV=1	3052.45	2488.03	4015.74	3752.52	2152.39	3098.65	2998.08	3343.1	3489.09	5561.24	4954.81	4851.76	8198.18	5960.1	7969.46	7301.06	4959.96	5396.59	2343.62	3049.39	1617.58	2056.33	5040.04	5888.29	4611.58	3733.91	6443.89	5009.35	4067.2	3271.82	2566.53	1731.33
A0A0H2ZHF4	47	18	334.961	Putative ABC transporter, ATP-binding protein OS=Pseudomonas aeruginosa (strain UCBPP-PA14) GN=PA14_60800 PE=4 SV=1	189294	208629	172951	164601	115611	107928	100642	104580	86344.2	93840.6	77118.5	79346	79882.2	83942.3	72767.7	75885.5	105882	113289	193722	196249	93568.7	100394	211973	242351	78628.7	78847.2	86560.1	88399.1	145359	151535	97758.7	97143.9
A0A0H2ZBX1	4	2	20.7093	Putative methyl-accepting chemotaxis transducer OS=Pseudomonas aeruginosa (strain UCBPP-PA14) GN=PA14_30820 PE=4 SV=1	2375.64	2661.67	1812.59	1736.87	3869.76	3409.99	2930.94	2687.74	5757.71	7059.48	5567.99	6292.77	3264.84	3723.55	4616.39	5232.61	3975.47	3782.99	3182.92	3720.97	5846.15	6246.75	2679.16	2884.23	5896.08	5991.61	3382.57	3796.64	3336.59	3488	7938.16	7251.22
A0A0H2Z7G9	9	5	56.9177	Peptidoglycan associated lipoprotein OprL OS=Pseudomonas aeruginosa (strain UCBPP-PA14) GN=oprL PE=3 SV=1	2006.19	2636.74	7488.8	6790.26	11278.9	9069.14	7921.75	8710.94	18626.3	27504.7	22956.9	19065.8	3219.03	1876.3	7304.4	6749.82	5027.23	4949.49	6376.77	4251.07	27876.4	22077.3	4395.73	4073.67	14276.2	17735.4	3773.41	2164.03	1566.23	1111.74	12975.6	8744.79
A0A0H2ZD54	5	1	41.571	3-oxoacyl-[acyl-carrier-protein] reductase OS=Pseudomonas aeruginosa (strain UCBPP-PA14) GN=fabG PE=4 SV=1	1346.36	1381.36	539.147	723.451	11108.6	11714.8	1668.52	2220.36	7228.58	8022.93	6038.78	6382.99	8445.48	8578.51	5541.44	5782.76	9654.63	10203.1	3692.61	3808.89	10402.4	9762.35	1140.31	1465.95	7396.9	7677.68	4703.18	4903.41	8451.03	10236.7	8074.49	7408.83
Q02TL3	23	5	133.417	Phosphoglycerate kinase OS=Pseudomonas aeruginosa (strain UCBPP-PA14) GN=pgk PE=3 SV=1	8361.91	10294.1	6273.76	8227.98	8251.7	9256.99	6563.52	5790.58	14186.5	15984.6	10946.9	10994	14276.4	13093.5	12974.8	12892.6	15588.4	13378.2	13986.2	15137	18606.1	16602.3	13832.6	13304.5	10023.7	11648.3	12335.8	12569.2	18817.2	17832	15679.4	12809
A0A0H2ZJW9	12	6	63.7993	Chromosome partitioning protein OS=Pseudomonas aeruginosa (strain UCBPP-PA14) GN=parB PE=3 SV=1	9986.12	13347.2	11654	9550.92	6814.84	6503.04	7590.76	7952.49	5492.41	5493.18	4129.01	4294.31	4962.51	4859.88	4486.07	4728.96	5852.15	6147.94	9023.73	9803.02	3768.61	4502.43	10737.9	13727.1	4470.59	4567.96	5249.2	5607.27	7155.85	9401.98	5679.99	5641.35
A0A0H2Z8W2	2	1	13.5946	Succinate dehydrogenase, cytochrome b556 subunit OS=Pseudomonas aeruginosa (strain UCBPP-PA14) GN=sdhC PE=4 SV=1	986.387	641.011	1474.12	611.288	4249.55	4457.35	3820.64	4213.93	5526.59	5484.37	5758.75	6195.25	1198.24	1490.94	3122	3331.66	2197.36	1505.61	1383.41	1829.21	3638.14	3995.08	1022.37	1247.14	3829.27	5143.18	1071.04	1074.7	552.693	489.763	4250.27	5448.15
Q02TT1	48	13	270.462	Malate synthase G OS=Pseudomonas aeruginosa (strain UCBPP-PA14) GN=glcB PE=3 SV=1	14652.4	16607.7	12987.4	9225.25	12663.6	11357.6	13452.5	15082.7	17858.2	18378.1	14819.7	14855.4	18920.7	16465.1	17226.5	15623.9	20471.5	25259.5	23056.6	26399.1	28423.3	26247.9	25794.7	25165.5	14385.8	16914.8	18050.1	17600	26340.4	23919.7	18641.7	16286.9
A0A0H2ZEX2	18	8	117.412	Putative outer membrane protein, OmpA OS=Pseudomonas aeruginosa (strain UCBPP-PA14) GN=PA14_16630 PE=3 SV=1	37660.4	39998.3	42236	45428.9	54911.2	54536.2	31847.7	34597	45604.5	46882.7	37461.3	38008.6	45252	39883.1	39842.1	36943.9	59517.9	65609.5	80031.2	88693	95894.4	77104.7	82754.5	74960.5	46838.1	39550.2	48587.2	51993	65823.5	59470.4	55007.7	47376.7
Q02FV3	9	7	45.2911	tRNA/tmRNA (uracil-C(5))-methyltransferase OS=Pseudomonas aeruginosa (strain UCBPP-PA14) GN=trmA PE=3 SV=1	22799.2	24096.4	13336	6741.18	12205.9	11397.1	16725.9	15440.9	13406	13204.8	12403.4	11918.3	14899.4	14717.7	15697.2	14306.5	14712.4	9954.38	9070.26	9327.72	8752.19	6957.23	8494.3	8050.54	7962.04	7944.09	13047.1	10075.3	8121.74	7122.36	5959.55	5576.82
A0A0H2ZHB4	59	18	342.825	Chaperone protein ClpB OS=Pseudomonas aeruginosa (strain UCBPP-PA14) GN=clpB PE=3 SV=1	37018	39109.2	12861.4	4847.49	25020.5	20757.7	26431.2	20962.4	36236.3	35795.8	34663.2	28360.9	40100.2	34903.5	44698.2	37248.3	44749.9	37584	37416	26326.7	46503.1	36571.7	68188	51411.7	20494.7	24439.1	38672.1	32969.3	19597.5	12890.7	21966.8	20777.2
A0A0H2ZFB4	4	2	28.4147	Probable chaperone OS=Pseudomonas aeruginosa (strain UCBPP-PA14) GN=PA14_14330 PE=4 SV=1	2048.83	3256.39	5272.13	4899.5	8276.81	4339.01	7037.56	8356.38	4289	4669.9	8130.6	8402.88	11526.4	11604.8	11621.6	12062.4	5197.04	7453.96	16774.6	14587.4	5874.92	5322.4	11894	9554.84	4938.3	5664.87	12283.9	8763	19871.2	16891.3	6731.49	5947.21
A0A0H2Z6Z5	4	2	19.7717	tRNA-modifying protein YgfZ OS=Pseudomonas aeruginosa (strain UCBPP-PA14) GN=PA14_54480 PE=3 SV=1	1526.92	1482.72	3583.16	2249.48	3283.81	2360.91	1790.04	2426.42	1228.83	1253.96	2062.81	2020.34	1821.82	1628.86	1763.12	1538.77	3404.76	3253.89	2777.28	3094.4	4485.47	3835.87	1921.22	2049.97	2380.81	2498.49	954.278	1085.04	3054.52	2060.49	2901.13	3050.38
A0A0H2Z808	38	13	214.485	Aconitate hydratase OS=Pseudomonas aeruginosa (strain UCBPP-PA14) GN=acnA PE=3 SV=1	31001.8	39260.4	27541.7	23377.9	33000	31213.5	20943.1	21089.3	34328	34142.5	23751.4	22670	27497	26192.2	24759.5	24068	43151.5	44371.7	51722.9	51303.7	52438	57211.2	51758.8	52616.1	28339.4	23894.7	27889.4	25031.5	29829.1	30462.9	35266.2	36253.2
A0A0H2ZKV4	6	2	37.9412	Polyhydroxyalkanoate synthesis protein PhaF OS=Pseudomonas aeruginosa (strain UCBPP-PA14) GN=phaF PE=4 SV=1	4711	6005.79	7577.99	8307.51	24522.2	20633.9	7743.95	8809.78	8755.83	9831.18	11275.7	10945	14518.5	14044.4	8444.64	8783.6	18524.2	16983.2	11924	7321.43	13376.4	13187	14440	14969.8	8400.99	10148.9	8102.82	6047.68	4995.51	5131.31	8127.45	8572.72
A0A0H2ZIC6	5	2	27.4081	Osmotically inducible lipoprotein OsmE OS=Pseudomonas aeruginosa (strain UCBPP-PA14) GN=osmE PE=4 SV=1	11546.1	10508.9	20819	25469	26662.1	24347.1	9905.68	9164.92	14044.9	13958.5	8093.14	7962.01	8560.36	9394.15	5975.69	6488.59	8824.37	8846.93	11011.3	10502.2	17876.1	17753	8613.81	9453.39	10003.4	8479.44	8551.9	8571.36	10069.4	9568.21	14915.7	14665.9
A0A0H2Z917	7	3	45.8739	Putative purine-binding chemotaxis protein CheW OS=Pseudomonas aeruginosa (strain UCBPP-PA14) GN=cheW PE=4 SV=1	966.644	1405.16	1396.72	1708.78	1722.16	1435.94	1048.17	1219.45	4496.45	2891.13	1711.1	1881.27	2528.71	2360.08	2158.15	2075.02	3844.71	2461.97	1508.54	1930.39	3280.55	4679.29	1280.33	1270.4	1738.82	1791.86	1978.53	1795.48	2208.86	1870.25	2559.7	2287.34
A0A0H2ZHB7	6	1	20.0091	Kinase sensor protein of two component regulatory OS=Pseudomonas aeruginosa (strain UCBPP-PA14) GN=pilS PE=4 SV=1	965.345	790.262	387.258	154.078	419.727	531.388	1094.88	901.915	1077.06	930.407	1105.51	1014.73	1072.09	1132.91	729.824	1041.17	1100.13	1436.77	1925.13	1031.16	1037.98	769.32	817.373	1206.7	778.175	1048.33	1361.4	1238.57	2384.18	1307	953.022	652.251
Q02T74	8	4	58.2408	30S ribosomal protein S3 OS=Pseudomonas aeruginosa (strain UCBPP-PA14) GN=rpsC PE=3 SV=1	12495.3	13505.3	11116.5	42677.2	14580.7	16939.9	23176.5	11402.2	27155.2	61119.8	12333	18547.4	18210.2	32330.4	33623.8	41149.7	13846.2	34939.3	10512.5	33583.9	36382.9	57716.7	15062.4	68202	37178.5	19588.6	13822.7	37757.5	52502	22003	23720.7	30530.3
A0A0H2ZIP4	38	16	227.755	Malic enzyme OS=Pseudomonas aeruginosa (strain UCBPP-PA14) GN=maeB PE=4 SV=1	30552.6	31817.4	32339.3	23655.8	41235.8	32832.9	34478.8	30093.3	56863	51112.7	41477.6	38077.2	55969.2	46698.5	51557.5	44918.5	65806.5	65394.9	61149.2	50794.9	81973.5	67572	46888.8	36413.6	51308.7	48310.3	51879.9	43271.5	69357.6	51328.1	56247	49846.4
Q02T82	69	33	490.82	Elongation factor Tu OS=Pseudomonas aeruginosa (strain UCBPP-PA14) GN=tuf1 PE=1 SV=1	502461	548211	429979	424759	639397	604385	342426	307229	655301	764496	412571	409627	601577	575144	523128	515922	750465	768868	761034	761058	1.14079e+06	1.05761e+06	907530	874055	437741	453987	549898	519485	713882	664798	743179	660234
A0A0H2ZKY4	12	8	66.7208	Sulfate-binding protein OS=Pseudomonas aeruginosa (strain UCBPP-PA14) GN=sbp PE=4 SV=1	11846.7	12007.3	11874.5	17846.1	9090.85	9211.69	11145.2	11781.5	5273.76	7057.82	5996.13	6974.95	6638.1	6582.75	6121.01	6689.67	6419.61	6900.99	11455.8	12312.6	9973.27	7543.22	13295.1	15314.9	6368.75	7129.46	6426.67	5275.92	8966.15	8977.32	8753.31	5847.23
A0A0H2Z7T0	52	16	351.083	Branched-chain amino acid transport protein BraC OS=Pseudomonas aeruginosa (strain UCBPP-PA14) GN=braC PE=4 SV=1	98760.2	90799	91597.2	93521.7	114726	104944	66911.6	62626.4	154855	156917	104042	104652	165451	153451	123820	121762	148348	145242	142691	135947	147555	137787	122547	126334	125644	109064	155565	152134	241691	222800	169409	160400
A0A0H2ZEP3	9	5	46.0329	Putative thioredoxin OS=Pseudomonas aeruginosa (strain UCBPP-PA14) GN=trx-1 PE=4 SV=1	37315.9	41733.2	62149.9	52384.1	27997.2	24525.2	24675	26046.8	22278.5	22316.4	19222.1	19945	18775.2	22341.5	17971.7	18013.3	23072.5	25228.1	34740.8	35534.5	18649	21523.4	32245.4	36529.8	22551.1	21619.6	23713.5	23026.1	30678.4	33860.7	21404.1	21272.4
Q02DF4	59	26	475.724	ATP synthase subunit beta OS=Pseudomonas aeruginosa (strain UCBPP-PA14) GN=atpD PE=3 SV=1	235554	249962	222558	234983	250352	231605	154073	155471	288223	297675	184736	184737	281067	270666	234089	236646	344686	357946	322502	334659	476600	430601	441759	463747	243347	219321	265877	271674	402702	372363	322235	307581
A0A0H2ZGA7	33	14	214.346	Pyruvate kinase OS=Pseudomonas aeruginosa (strain UCBPP-PA14) GN=pykA PE=3 SV=1	60188.4	64217.3	59568.3	54329	43564.7	37791.4	33856.6	38546.7	35820.4	34054	29505.3	30654.4	31169.4	35054.3	29044.7	29648.4	39529.4	46418.4	66326.4	67714.8	42887.1	47565.7	75961.2	79450.9	34259.3	30291.3	28345.6	31437.8	50377	55589.7	38769.9	37437.7
A0A0H2ZIB3	14	9	72.6291	Phosphate import ATP-binding protein PstB OS=Pseudomonas aeruginosa (strain UCBPP-PA14) GN=pstB PE=3 SV=1	7237.68	9397.26	6042.49	6821.35	9926.66	10178.4	5729.72	6054.21	14179.9	20743.1	10929.1	12064	12726.8	13420.2	13732.8	13886.7	10196.5	12492.1	9264.66	9527.97	19823.9	16848.8	7847.76	9354.68	13055.3	12648.8	13968.6	13326.9	12520.5	12744.4	18660.8	15070.8
A0A0H2ZIC7	18	6	119.095	Protein HflC OS=Pseudomonas aeruginosa (strain UCBPP-PA14) GN=hflC PE=3 SV=1	25107.9	29520.3	27386	27629.9	22357.7	22675.4	22524.1	20607.6	18087.6	20401.9	12904.7	12160.9	11111.4	9731.46	12324.4	11834.4	15503.3	15350.4	15317.8	13835.6	22423.1	22068.1	15722.9	15451.4	17740.1	14255.4	11767.5	16237	14383.4	13420.1	18342.3	18329.5
Q02H55	81	45	544.662	60 kDa chaperonin OS=Pseudomonas aeruginosa (strain UCBPP-PA14) GN=groL PE=3 SV=1	1.03469e+06	1.10531e+06	935761	990777	1.20663e+06	1.14089e+06	633697	594314	884949	976969	650020	645168	995522	970593	771093	739966	1.28285e+06	1.34645e+06	1.38077e+06	1.29875e+06	1.84977e+06	1.79818e+06	1.57967e+06	1.52592e+06	754689	681372	988315	928763	1.48235e+06	1.38493e+06	1.11038e+06	1.01003e+06
Q02FR0	16	7	121.071	Protein GrpE OS=Pseudomonas aeruginosa (strain UCBPP-PA14) GN=grpE PE=3 SV=1	63386.7	68088.6	66938	73252.2	49230.8	50470.7	36861.2	35770.4	30965.2	33535.8	27453.1	28786.1	33787.7	33437.8	28229.1	29112.4	42100.6	44369	62254.7	62566.7	51624.9	48814.7	64277.6	68677.6	27094.7	26575.4	35915.9	34179.7	62723.4	58548.3	39497.7	36765
A0A0H2ZIW1	29	11	222.514	DNA polymerase III subunit beta OS=Pseudomonas aeruginosa (strain UCBPP-PA14) GN=dnaN PE=4 SV=1	31749.2	42408.7	16265.7	13638	29035.1	26376.5	26927.4	25754.3	32317.1	38544.6	27869.6	26498.9	37676	36237.2	31859.2	30023.7	39736.6	46634.4	41948.5	42428.2	48065.7	48132	40802	39177.3	17774.7	23527.4	24637.7	21734	31964	31285.5	22182.4	18706.2
A0A0H2ZL15	13	5	86.4928	Uncharacterized protein OS=Pseudomonas aeruginosa (strain UCBPP-PA14) GN=PA14_04100 PE=4 SV=1	5431.35	4789.35	2920.68	2357.95	9650.41	11128.3	7136.66	6523.49	6681.84	6192.34	6250.41	5972.46	10895.7	9130.8	9107.99	9397.53	14345	13551.5	9113.29	5815.63	17837.1	14062.3	10541.1	5041.07	7021.11	9752.08	13490.5	9276.42	8029.81	8429.01	12180.6	9756.74
A0A0H2ZK92	13	5	104.873	Putative major cold shock protein OS=Pseudomonas aeruginosa (strain UCBPP-PA14) GN=cspB PE=4 SV=1	26558.2	37015.6	6782.97	4041.52	23651.5	21533.2	35209.7	34015.6	37310.6	41978.2	30481.5	27776.6	52468.5	49819.1	34965	27036.8	42461.2	48796.9	31004.1	35138.7	63106.3	57726.1	33882.5	29124.8	17980.4	26339.2	21234.2	21633.9	32255.8	35213.2	17414.3	16719.2
A0A0H2ZDW1	4	4	21.5232	Uncharacterized protein OS=Pseudomonas aeruginosa (strain UCBPP-PA14) GN=PA14_22250 PE=4 SV=1	11003.2	13111.6	10638.9	12230.9	8137.33	9148.34	8300.42	7829.28	3595.42	6787.47	5372.98	5007.2	5914.54	5652.71	6292.25	5936.31	4639.08	7571.01	10743.4	9858.51	5908.02	6404.91	14964.5	15323.7	5513.73	5092.2	6930.1	7005.15	8555.89	7838.2	6256.2	3894.81
A0A0H2ZD83	4	1	26.9933	Putative outer membrane porin OS=Pseudomonas aeruginosa (strain UCBPP-PA14) GN=opdQ PE=4 SV=1	505.566	539.278	265.463	390.618	743.714	966.243	360.115	434.577	1394.61	1722.85	807.083	808.295	778.28	909.7	546.781	425.797	726.098	1281.68	653.834	1006.57	733.601	764.764	178.924	146.304	880.273	904.846	767.384	816.989	765.008	862.578	1212.01	1358
A0A0H2ZBP4	4	2	26.3108	Putative short-chain dehydrogenase OS=Pseudomonas aeruginosa (strain UCBPP-PA14) GN=PA14_31510 PE=3 SV=1	9690.14	16049.2	9545.09	16321.6	7893.76	9496.18	4684.57	4627.21	7310.33	8388.03	6316.89	6197.48	10539.7	9418.3	7298.86	7071.35	8470.25	12484.5	14167.9	13292.3	13743.3	14268.2	12931.6	15874.6	4776.24	4313.02	5905.15	4570.41	11630.4	12597.7	6385.2	8350.81
A0A0H2ZJ76	6	1	36.948	Phosphate transport system permease protein PstA OS=Pseudomonas aeruginosa (strain UCBPP-PA14) GN=pstA PE=3 SV=1	73893.9	81750.3	101037	106840	72490.2	66393.8	44736.4	48989.5	46437.8	48544.1	36168.8	38033	39426.7	45119.8	38277.4	39694.4	42578.7	49411.1	63894.4	60881.6	42543.7	49722.1	77051.7	87446.3	40260.1	38550.9	42755.7	41848.6	77255.5	86265.6	43224.5	42994.4
A0A0H2Z616	3	1	17.1364	Glutathione peroxidase OS=Pseudomonas aeruginosa (strain UCBPP-PA14) GN=btuE PE=3 SV=1	406.282	204.337	120.242	37.0494	99.1263	119.302	398.036	672.781	118.441	129.86	195.006	193.366	333.986	129.751	169.322	176.679	163.675	359.758	380.427	218.494	306.222	449.888	382.23	315.447	238.914	141.782	195.287	251.636	353.809	289.742	252.257	216.479
A0A0H2ZJ97	10	1	56.3718	Nucleoside diphosphate kinase regulator OS=Pseudomonas aeruginosa (strain UCBPP-PA14) GN=rnk PE=4 SV=1	198.84	219.94	451.912	290.227	302.649	286.5	182.386	213.036	159.27	93.3153	181.126	160.005	186.381	181.763	146.16	99.4423	286.237	206.121	232.637	208.855	134.153	97.6211	314.809	319.669	202.634	180.455	138.635	162.504	217.766	316.288	280.736	128.07
Q02FR3	19	7	95.2679	4-hydroxy-tetrahydrodipicolinate reductase OS=Pseudomonas aeruginosa (strain UCBPP-PA14) GN=dapB PE=3 SV=1	7764.9	8502.81	4320.52	5898.51	4362.81	4876.83	5058.2	5391.18	6763.84	6386.14	5250.86	4910.51	6291.74	6249.46	5669.09	5018.87	8336.41	8214.14	9107.38	9003.98	7483.19	8587.37	9889.72	9974.1	4232.33	4201.38	4533.07	4137.66	6196.97	6661.38	4525.86	5269.37
A0A0H2Z9P0	14	4	81.8146	Putative hydrolase, isochorismatase family OS=Pseudomonas aeruginosa (strain UCBPP-PA14) GN=PA14_42820 PE=4 SV=1	968.484	1057.22	852.011	495.053	1166.85	836.43	1472.65	1371.75	1452.85	860.098	1692.59	1425.67	2263.91	2260.14	1638.89	1591.58	2504.94	2418.74	1799.67	1548.32	1497.26	805.053	1819.11	1574.98	1650.97	1686.58	1821.67	1825.25	2053.5	2582.65	1550.89	1425.06
Q02H45	5	3	27.0883	UPF0234 protein PA14_57130 OS=Pseudomonas aeruginosa (strain UCBPP-PA14) GN=PA14_57130 PE=3 SV=1	6480.92	6572.81	3787.38	3113.26	6496.07	4335.77	6557.57	6951.34	5814.42	5694.28	4965.4	4962.79	5314.64	5925.09	5381.3	5563.99	6593.02	8079.22	9879.32	11953.8	8371.22	9085.44	11450.9	11782.1	5635.5	4916.14	5144.12	4675.56	7980.31	9636.97	6012.02	5145.72
A0A0H2ZC68	38	13	253.999	Pilus assembly protein OS=Pseudomonas aeruginosa (strain UCBPP-PA14) GN=fimV PE=4 SV=1	43959.1	43379.7	44716.7	44402.2	38805.4	38511.3	35788.3	37951.6	23615.1	25232.4	24912.8	24073.5	27032.4	26498.1	24580.6	25121.5	21246.6	18351.8	24241.6	23521.4	23644.9	20297.4	26102.6	27765.4	25304.9	23014.9	27720.4	26846.7	36238.1	33955.3	25254.7	23741.4
A0A0H2ZK53	4	2	17.9766	Putative transcriptional regulator OS=Pseudomonas aeruginosa (strain UCBPP-PA14) GN=PA14_01500 PE=4 SV=1	2664.18	2208.13	3338.16	2868.71	3105.67	2211.67	2585.15	2980.48	2374.59	1455.46	1908.67	1826.47	2457.16	2183.28	1693.52	1641.5	1594.09	1128.52	2052.21	1469.82	928.219	794.118	2217.93	2254.87	2405.96	2345.31	2504.72	2287.08	2167.81	1749.06	1990.39	1733.61
A0A0H2ZBY5	14	3	112.877	Uncharacterized protein OS=Pseudomonas aeruginosa (strain UCBPP-PA14) GN=PA14_24770 PE=4 SV=1	26295.3	30749.2	60643.1	49481.3	55356.5	59405.7	30272.4	30503	40231.4	44294.2	32247.3	31979.7	28779.7	28413.9	29667.6	28789.2	44553.4	51772.7	51042.1	47097.4	90857.1	86219.7	45032.8	47227.5	35628	40835.1	34435.1	32491.2	36249	36217.8	48561.6	45822.3
A0A0H2ZJC1	9	3	64.5032	Transcriptional regulator SutA OS=Pseudomonas aeruginosa (strain UCBPP-PA14) GN=sutA PE=1 SV=1	4284.05	4486.06	3669.78	4713.64	5905.29	5552.73	4444.1	4758.98	3070.44	2758.35	3349.64	3643.01	2957.01	3783.18	3185.12	3036.51	4409.17	4747.12	5242.71	5259.17	4570.97	5082.64	8346.68	7376.95	3045.91	2886.86	2726.13	3183.59	3707.84	4569.47	3753.9	3546.98
A0A0H2ZGH7	16	6	105.331	Putative cytochrome c1 OS=Pseudomonas aeruginosa (strain UCBPP-PA14) GN=PA14_57540 PE=4 SV=1	15303.9	15916.9	22136.4	18760.3	31825	29271.8	17881.5	17607.2	35476.1	34217.1	41027.9	36464.9	15019.8	13928.3	31273.9	25541.4	20924.3	23483.1	33164.5	33429.1	69161.7	52794	33736.3	26517	32579.8	33548.7	14151.3	13948.6	17124.6	14515	39664.5	33561.4
A0A0H2ZJ32	14	6	62.7421	Putative aldehyde dehydrogenase OS=Pseudomonas aeruginosa (strain UCBPP-PA14) GN=aldH PE=3 SV=1	15762.6	17496.2	18506	22562.2	10923.1	9610.99	11697.7	13237.8	9106.61	9242.81	7910.2	8605.96	8688.35	8949.42	7784.28	8770.09	11228.4	11154.8	13600.2	14130.1	9692.27	10439.5	12905.9	12433.4	9389.4	8851.31	8492.95	8110.91	15480.3	16471.1	9427.26	9648.4
A0A0H2ZFW8	11	5	70.833	Type IV pilin structural subunit OS=Pseudomonas aeruginosa (strain UCBPP-PA14) GN=pilA PE=3 SV=1	1758.78	1115.68	2974.77	3228.9	2988.55	2244.77	3082.98	3270.59	2977.56	5163.76	2652.89	2830.35	1391.69	1634.09	2824.78	3823.09	2167.68	850.451	1020.23	1019.54	3352.44	2807.1	1044.84	1199.5	3453.82	3226.58	2580.88	2369.72	397.218	566.254	4358.76	2605.63
Q02ND6	3	1	11.1109	NADH-quinone oxidoreductase subunit I OS=Pseudomonas aeruginosa (strain UCBPP-PA14) GN=nuoI PE=3 SV=1	762.764	905.812	363.361	358.553	487.466	441.809	673.03	706.454	283.991	215.09	512.861	483.364	306.536	273.825	360.582	280.394	439.531	448.206	783.793	796.241	117.112	218.575	411.076	497.52	424.888	399.137	461.617	488.269	440.489	663.92	468.059	359.851
A0A0H2Z9F5	45	24	300.72	Dihydrolipoyl dehydrogenase OS=Pseudomonas aeruginosa (strain UCBPP-PA14) GN=lpdG PE=4 SV=1	114066	125418	115215	118930	183499	174323	90603.7	99243.9	233524	244462	147015	151134	196013	214681	182130	192183	198756	203171	151381	158424	341741	336785	156370	143415	207256	170941	207784	216044	209937	215886	279151	258361
Q02T55	38	14	292.554	DNA-directed RNA polymerase subunit alpha OS=Pseudomonas aeruginosa (strain UCBPP-PA14) GN=rpoA PE=3 SV=1	120273	121922	146734	130909	112459	101187	85086.8	79131.8	95134.6	93133.3	75143.7	70532.9	95409.6	83673.7	82862.5	75254.8	127761	130383	144626	136480	165359	141798	163859	148374	93659.3	81798.5	92342	89987.6	156775	132189	95933.5	89344
A0A0H2ZJ00	7	5	50.2054	Osmotically inducible protein OsmC OS=Pseudomonas aeruginosa (strain UCBPP-PA14) GN=osmC PE=4 SV=1	8785.2	7635.54	6892.48	8663.95	7836.7	6176.92	5924.05	5461.06	10108.2	12390.7	7090.18	6839.98	10800.2	10761.7	10359.7	9985.31	5490.32	5465.66	5561.38	5353.14	4621.78	4343.23	7126.93	7428.67	6532.04	9236.1	12328.7	9837.49	8219.19	9153.79	10054.1	9264.38
A0A0H2ZGK4	52	25	354.987	Catalase OS=Pseudomonas aeruginosa (strain UCBPP-PA14) GN=katA PE=3 SV=1	195416	204674	199194	241490	166041	159480	117436	116352	152232	167096	130432	136029	112560	118893	121804	123711	191817	218081	248828	243609	202221	199823	261559	266336	154740	143748	140003	138631	198764	194539	188451	172161
A0A0H2Z954	16	2	77.8231	Cbb3-type cytochrome c oxidase subunit OS=Pseudomonas aeruginosa (strain UCBPP-PA14) GN=ccoP PE=3 SV=1	960.421	824.715	1282.6	1117.12	1723.26	1706.72	1205.85	1389.08	2008.1	2891.72	2136.73	2265.43	773.135	1189.81	1624.3	1955.35	845.805	961.499	817.816	1224.91	2597.93	2856.34	1143.68	1354.31	2244.41	2351.01	1215.41	1559.64	1458.37	1745.54	3605.27	3415.36
A0A0H2ZKB4	12	6	66.0673	Uncharacterized protein OS=Pseudomonas aeruginosa (strain UCBPP-PA14) GN=PA14_04010 PE=4 SV=1	15852.5	15077.9	19089.6	14565.9	9948.19	10439.3	10111.9	10730.9	9818.9	10197.9	9109.37	8520.17	9327.27	7659.85	10407.4	8802.94	11342.5	13651.2	19740.7	19225.5	11966.2	13533	18372.8	18858.5	9027.25	10455	10988.1	9651.51	15057.7	14472	10139.2	8729.34
A0A0H2ZFW1	8	3	47.3014	Uncharacterized protein OS=Pseudomonas aeruginosa (strain UCBPP-PA14) GN=PA14_11910 PE=4 SV=1	4853.22	5360.13	3566.75	4302.67	5724.58	5800.87	3463.82	3257.19	4264.13	5193.98	2567.11	2857.82	3137.24	2836.42	2039.2	2330.61	2845.91	3024.25	3636.72	3943.59	4420.06	4772.63	3207.1	4307.85	2200.31	2049.61	2443.73	2272.67	2382.35	2554.05	3790.05	3539.26
Q02T87	136	52	862.705	DNA-directed RNA polymerase subunit beta OS=Pseudomonas aeruginosa (strain UCBPP-PA14) GN=rpoB PE=3 SV=1	355557	387534	379914	392620	446491	422256	267901	279591	295149	306250	250406	245034	246374	259395	233303	236546	400127	420362	440572	428424	481904	503987	423201	441122	302347	277019	285550	284155	366598	366021	357070	340626
A0A0H2Z953	8	3	54.1714	Sulfate-binding protein of ABC transporter OS=Pseudomonas aeruginosa (strain UCBPP-PA14) GN=cysP PE=4 SV=1	7314.23	6047.94	6111.44	6323.01	7649.74	6751.24	5076.28	5483.18	9356.36	9499.41	6785.24	7446.09	8603.48	9997.43	7569.53	7948.19	6466.4	5964.16	6697.85	7431.12	6391.71	6230.59	7526.08	9189.19	8558.25	9205.54	10249.9	9971.07	13300.8	14435.1	10426.5	10459.5
Q02RH2	32	19	174.236	Lysine--tRNA ligase OS=Pseudomonas aeruginosa (strain UCBPP-PA14) GN=lysS PE=3 SV=1	40004.3	46680.9	42425	35721.8	43202.3	41773.3	32025.4	32527.7	50832.8	47611.5	35575.2	34620.5	32836.5	32673.8	26088	24969.7	55587.5	56146.1	55893.7	49677.2	91812.5	86964.2	44721.9	44932.7	37947	33201.3	30553.3	28739.3	36987.3	37723.7	49387.5	47075.7
A0A0H2ZCH3	11	3	79.1104	Translation initiation factor IF-3 OS=Pseudomonas aeruginosa (strain UCBPP-PA14) GN=infC PE=3 SV=1	4435.19	2819.75	988.365	716.933	4746.59	4674.27	3108.2	2736.94	2330.19	2709.97	2844.49	3274.06	3819.62	4383.47	2613.1	2567.17	3641.22	4861.81	4912.39	5027.96	3838.1	3550.13	6667.06	5141.19	2010.23	2419.77	3111.44	2631.98	3397.51	3338.65	2216.84	3009.6
A0A0H2Z7X1	80	38	555.814	Flagellin OS=Pseudomonas aeruginosa (strain UCBPP-PA14) GN=fliC PE=3 SV=1	206160	232257	267973	235108	243984	220784	138479	142209	245009	278237	190044	194099	249687	266987	232660	235609	332918	357239	364281	348048	381273	406119	328576	346723	235312	224958	303704	287526	338216	348683	317163	305381
Q02DF2	77	38	472.837	ATP synthase subunit alpha OS=Pseudomonas aeruginosa (strain UCBPP-PA14) GN=atpA PE=3 SV=1	253223	268047	279117	276132	290336	306749	179545	181002	310644	375697	239303	245272	312920	316876	275920	284952	378736	420432	382114	376111	518511	526527	408477	438397	301270	292602	321426	306588	435746	430655	401152	364472
A0A0H2ZG72	7	2	41.7703	Bacterioferritin OS=Pseudomonas aeruginosa (strain UCBPP-PA14) GN=bfrA PE=3 SV=1	17212.9	20896.3	30351	35705.4	24308.6	28794.2	13099.4	13740.4	16046.5	13026.1	13861.1	14216.3	14905.5	16835.9	9186.41	10687.2	23712.3	23581.2	21541.1	20286.9	17525.3	19956.5	24920.8	20312.4	13174.7	13796.5	11257.8	11746.5	25458	28358.8	15892.8	16853.7
A0A0H2ZIJ0	7	2	42.234	Putative carbamoyltransferase OS=Pseudomonas aeruginosa (strain UCBPP-PA14) GN=PA14_66170 PE=4 SV=1	2215.59	2956.39	4991.43	3489.85	2897.29	1343.78	2180.84	2285.67	2398.39	2878.42	2741.7	2944.93	2541.96	2843.45	3706.8	3605.32	3497	3027.8	4721.47	3668.53	2000.18	1636.56	2111.09	3059.77	4569.94	3963.05	7329.26	6300.5	4384.23	4758.14	3438.36	3084.5
Q02T90	26	11	183.845	50S ribosomal protein L1 OS=Pseudomonas aeruginosa (strain UCBPP-PA14) GN=rplA PE=3 SV=1	15910.9	14616.8	63641.5	62685.7	35942.6	34688.5	25393.1	26860.9	23741.2	23712.6	15344.8	16909.7	24232.1	26435.8	17206.1	18189.3	21749.4	21712.6	20180.4	19326.1	27779.4	30445.5	35021.3	35957.6	18928.1	18186.7	23793.6	24435.4	22040.1	21635.8	28355.2	27725
Q02T89	18	10	111.452	50S ribosomal protein L10 OS=Pseudomonas aeruginosa (strain UCBPP-PA14) GN=rplJ PE=3 SV=1	48491.4	58942.5	52688.9	57759.7	57147.6	59598.4	33783.7	35976.7	74788.9	83155.9	48969	47490.1	71845.7	74973.8	61208.2	61206.2	71882.6	78917.5	79023.2	74751.4	113376	117626	75143	71397.4	56464.1	56827.2	78222.2	75186.8	91810.8	87858.8	92357.3	87687.4
A0A0H2ZDD5	58	26	426.843	30S ribosomal protein S1 OS=Pseudomonas aeruginosa (strain UCBPP-PA14) GN=rpsA PE=4 SV=1	212368	225886	195138	207627	187713	178382	135306	128320	157751	168050	133627	127971	174186	165069	152635	140297	217989	226316	261357	247007	260716	240917	316592	285647	137672	134030	175101	174896	282522	256979	191384	177536
A0A0H2ZKG2	19	9	119.197	Putative exported protein OS=Pseudomonas aeruginosa (strain UCBPP-PA14) GN=PA14_06990 PE=4 SV=1	41137	73337.5	31804.2	12921.1	28216.8	20319.6	54519.3	47929	51821.6	70735.4	61059.6	60969.6	59473.8	53579.7	88886.5	76079.8	62130.4	77692.9	63679	72539.1	54700.8	49411.1	77054	65297.4	36980.6	54273.2	76795	60865.9	43326.1	38878.3	21872.3	22583.8
A0A0H2ZHQ2	32	16	198.22	Ornithine carbamoyltransferase OS=Pseudomonas aeruginosa (strain UCBPP-PA14) GN=arcB PE=3 SV=1	57905.8	64315.4	65586.6	75039.1	63655.8	61541.7	47025.5	48753.6	108161	113903	59342.5	59286.7	78481.9	78009	83324.8	85559.2	85285.7	85914.8	72060	68772.6	168555	171264	75569.4	86631.8	76755.3	72111.9	85788.4	88094.9	73833.9	73720.7	118258	104427
Q02DY8	2	1	10.6426	HTH-type transcriptional regulator BetI OS=Pseudomonas aeruginosa (strain UCBPP-PA14) GN=betI PE=3 SV=1	9418.71	10000.1	9533.34	12656.6	8198.14	8159.48	7432.75	6505.49	9348.51	9199.02	7275.08	6529.2	9795.54	6312.2	8988.15	6759.59	12938.7	13138.5	13944.4	12714.7	10443.4	10530.3	19996.9	13886.7	8882.74	7734.9	11291.8	8979.08	24991.2	19281.2	12920.7	10029
Q02MM1	26	13	154.84	CRISPR-associated protein Csy3 OS=Pseudomonas aeruginosa (strain UCBPP-PA14) GN=csy3 PE=1 SV=1	17268.4	16252.6	15288.2	16800.8	16614.2	18896.5	13588.2	14564.8	14439.7	18224.6	13207.6	12952.3	15812.9	15367.2	13582.3	13839.8	21805.7	23474.4	24368.3	22024	31905.6	30364.5	22453.2	20105	16519.1	14597.4	16853.8	15733.9	22458.8	20606.8	18506.4	14469.6
A0A0H2Z828	35	23	211.686	Succinate--CoA ligase [ADP-forming] subunit alpha OS=Pseudomonas aeruginosa (strain UCBPP-PA14) GN=sucD PE=3 SV=1	202295	213557	174789	171257	217167	204892	140534	139203	236943	261450	175072	174947	245067	247746	210110	206246	246670	272647	274495	259409	384148	372100	314941	314522	184883	177953	212923	201819	289436	278779	281057	269392
Q02T58	15	10	77.1163	30S ribosomal protein S13 OS=Pseudomonas aeruginosa (strain UCBPP-PA14) GN=rpsM PE=3 SV=1	29374.5	26421.5	26590.7	24592.3	37069.3	43909.6	17836.9	18480.6	19824	24367.6	18359.1	18862.6	20106.8	22464.4	16996.3	16516.2	31610.5	29552.1	34159.9	27407.8	32377.6	30607.6	35104.5	41413.1	19346	18230.3	19570.6	17434.9	23316.8	21067	24341.2	22047.4
A0A0H2ZBK8	7	1	43.4896	Uncharacterized protein OS=Pseudomonas aeruginosa (strain UCBPP-PA14) GN=PA14_32820 PE=4 SV=1	3000.37	2512.11	2293.25	2770.3	2022.14	1939.99	1550.79	1639.34	1597.78	1491.96	1129.51	1178.24	1389.87	1293.95	1345.2	1221.67	1102.48	1342.36	1562.88	1267.12	1873.01	2220.96	1662.69	2115.06	1306.34	1152	1089.51	1239.05	2074.76	2174.52	1985.03	1832.15
Q02KU3	66	25	437.307	Trigger factor OS=Pseudomonas aeruginosa (strain UCBPP-PA14) GN=tig PE=3 SV=1	102194	112850	85514.1	92771.4	92787.2	89916.5	68160.4	64035.5	52268.2	51765.2	49564.5	45829.6	66368.8	60608.3	50611.5	48390.5	70316.5	69734	85412.7	82729.2	71658.8	63159.5	96796.3	95191.2	53604.1	51062.9	69020.1	60668.6	112396	103578	66025.1	55970.4
A0A0H2ZFL0	29	12	201.608	Arginine biosynthesis bifunctional protein ArgJ OS=Pseudomonas aeruginosa (strain UCBPP-PA14) GN=argJ PE=3 SV=1	43034.6	39405.3	27983.3	38169.9	33863.7	27742.1	21525	23049.7	25698.1	26780	19925.1	18477.6	21413.3	22333.3	21677.4	22029.6	72484.9	69773.4	22042.5	19251.2	32200.6	32322.5	24773.8	23591.4	21233.2	20746.3	22362.1	22644.1	24639.5	21661.6	28570.5	30744.4
A0A0H2Z8J8	3	1	22.7491	Uncharacterized protein OS=Pseudomonas aeruginosa (strain UCBPP-PA14) GN=PA14_41970 PE=4 SV=1	37314	44573.7	50936.5	56755.2	27025.8	27710.5	24758.9	24366.4	23436.7	29291.7	24036.1	23655	26331.5	27057.3	26369.4	26637.4	37110.3	41337.5	47455.6	46437.1	27748.1	26346.6	39208.8	41470.4	34020.7	31681.6	44851.1	42757	58690.5	58586	38191.9	34605.9
A0A0H2Z8P3	25	9	162.056	Putative ATP-binding component of ABC transporter OS=Pseudomonas aeruginosa (strain UCBPP-PA14) GN=gltL PE=4 SV=1	44508.2	48574.6	46636.8	50466.6	38585.5	36119	31226	32815.8	32563.1	32321.2	27429.1	27310.4	29136.7	32972.9	28678.4	30657.1	40428.6	43344.4	44118.9	38817.9	53299.4	55128.6	58876.9	65072.7	30574.6	28698.9	27079.3	29966.3	44686.8	44522.5	40316.1	39913.2
A0A0H2ZEW8	48	26	290.55	Inosine-5'-monophosphate dehydrogenase OS=Pseudomonas aeruginosa (strain UCBPP-PA14) GN=guaB PE=3 SV=1	165889	181940	160956	154417	108861	108211	110970	109190	108574	117773	98180.2	102200	116603	115077	112167	98713.4	128727	147316	189721	190266	148483	151788	245654	236979	85959.3	95280.5	104562	93453.8	161880	155117	110500	96595.9
Q02UB7	28	12	170.426	Putrescine-binding periplasmic protein SpuD OS=Pseudomonas aeruginosa (strain UCBPP-PA14) GN=spuD PE=1 SV=1	153424	183696	102214	90339.1	150785	150467	99823.3	98270.1	80265.5	89484	75315.5	72497.5	114176	108114	85596.1	79650.3	112488	134208	145649	140723	143168	134741	177417	176703	69316.8	76521.9	94186.7	88227.4	144452	135429	98541.4	92573.4
Q02RC8	23	11	149.091	30S ribosomal protein S2 OS=Pseudomonas aeruginosa (strain UCBPP-PA14) GN=rpsB PE=3 SV=1	54457.8	57302.9	64655.4	55282.2	65155.9	59410.2	40679.6	38405.6	40122.8	40571.5	44460.9	44472.5	37834.3	36294.8	34495	33580	49625.5	51066	72646.9	62227	75485.7	74811.2	67699.9	61497.5	44086.5	40162.2	37819.8	34482.5	59830.8	55703.4	42758.6	39543.6
A0A0H2ZC91	9	2	53.4421	Uncharacterized protein OS=Pseudomonas aeruginosa (strain UCBPP-PA14) GN=PA14_29710 PE=4 SV=1	198.277	175.621	404.094	180.6	312.21	234.652	459.935	450.801	307.616	314.215	224.234	258.704	396.419	393.702	680.97	383.582	177.441	242.463	493.131	253.55	284.574	410.706	335.478	697.438	512.048	664.496	1103.26	827.086	178.849	204.246	230.539	269.882
Q02T80	13	8	72.0941	50S ribosomal protein L3 OS=Pseudomonas aeruginosa (strain UCBPP-PA14) GN=rplC PE=3 SV=1	6767.37	7101.53	7768.08	5907.01	11102.2	12322.7	8990.09	9735.54	16790.1	16643.9	11240.4	11170.9	15926.6	16123.2	13128.9	12948.4	14092	14322.5	5936.64	5513.91	21047.5	21146.9	5275.71	5951.92	11839.3	12404.9	16355.2	16066.3	12187.5	10070.2	17875.9	18197.1
A0A0H2ZJ10	11	6	75.856	Nitrogen regulatory protein PII OS=Pseudomonas aeruginosa (strain UCBPP-PA14) GN=glnK PE=3 SV=1	82955.9	93619	96181.6	103923	77071.5	79394.9	55823	59816.4	54514.5	60462.5	46738.6	48636.1	61002	63802.3	46034.9	46302.9	64321.3	68303.3	95901.6	100493	81333.3	82044	107854	104966	54103.4	46784.4	54902.3	52623	111762	112257	68963.9	62568.4
A0A0H2ZDR8	3	2	14.0425	ATP-dependent Clp protease proteolytic subunit OS=Pseudomonas aeruginosa (strain UCBPP-PA14) GN=clpP PE=3 SV=1	9791.04	8329.16	7954.44	8781.38	5589.87	5005.94	7270.96	7298.09	5606.55	5153.51	5462.1	5698.38	5348.33	5498.12	5804.81	5818.6	5052.74	5262.41	6776.32	6903.26	3139.06	3139.84	5416.04	5751.61	6857.56	6816.63	8822.38	9121.14	10743.6	11496.4	6896.07	7398.08
A0A0H2ZD46	6	3	25.2632	Putative oxidase OS=Pseudomonas aeruginosa (strain UCBPP-PA14) GN=PA14_25810 PE=4 SV=1	18451	18431.6	12127	14257.2	11943.2	15675.3	12211.3	12697.1	10058.9	19929.7	7234.09	9138.69	11411.6	10228.7	12404.5	11792.3	11045.6	16394.3	14381.3	15971.7	19082.9	22025.9	19458.6	24464	10510.8	9108.02	7376.97	12096.5	14889.9	12970.9	12795.2	7167.07
A0A0H2ZB32	4	2	21.7747	Dihydrolipoyl dehydrogenase OS=Pseudomonas aeruginosa (strain UCBPP-PA14) GN=lpdV PE=4 SV=1	2656.48	3340.13	3816.48	4352.96	3710.96	3355.26	2677.98	2860.14	4889.6	2930.34	2456.79	2290.26	2046.19	1757.37	2032.99	2121.95	4392.98	3225.67	3855.01	4832.13	3775.41	6271.57	3604.16	3691.99	2726.85	2204.76	2287.45	2628	3520.26	2873.88	3630.62	5091.79
A0A0H2ZL01	2	1	11.8914	Putative zinc protease OS=Pseudomonas aeruginosa (strain UCBPP-PA14) GN=PA14_04890 PE=4 SV=1	183.352	630.049	15.5908	17.799	407.907	550.416	674.99	611.342	573.973	579.309	596.317	634.089	598.381	856.035	590.368	633.655	381.43	567.468	335.97	379.121	756.352	1264.14	378.343	532.029	298.808	557.942	385.636	431.437	350.625	500.349	743.574	655.479
A0A0H2ZAY4	25	11	123.65	NADH-quinone oxidoreductase OS=Pseudomonas aeruginosa (strain UCBPP-PA14) GN=nuoG PE=3 SV=1	25068.4	27626.2	27374.8	32411.1	20040	21619.3	16797.7	16726.9	20795.5	21369.7	18639.3	17804.7	20000.7	18994.3	18648.6	17637.6	27111.9	24142.5	35057.8	35174.2	28881	26411.1	38875.9	36322.2	20889.8	20362.8	21264.2	21158.3	31102.1	28074.9	25486.1	22674.6
A0A0H2ZLF5	3	1	15.4242	Uncharacterized protein OS=Pseudomonas aeruginosa (strain UCBPP-PA14) GN=PA14_06150 PE=4 SV=1	6453.41	5610.6	5553.53	6478.6	3647.63	4180.24	5157.48	5357.55	6514.59	5978.03	3841.09	4367.81	6350.75	6390.22	4423.99	4602.69	7812.64	8132.32	9698.84	10549.6	7140.91	8242.35	8326.03	9462.92	4661.68	4262.01	4492.14	5417.72	8782.85	10088.7	5666.86	5807.1
Q02DF3	23	9	155.402	ATP synthase gamma chain OS=Pseudomonas aeruginosa (strain UCBPP-PA14) GN=atpG PE=3 SV=1	25098.2	25363.6	21165.7	27813	25223.7	24690.2	25934.2	22261.2	36966.9	40572.5	28533.8	29071.3	32548.6	30645.8	34166.3	33727.6	34476.6	37786.9	27919.7	31992.5	51485.7	46793.8	34119.6	30478.6	38184.1	38737.4	39606	42339.9	44202.6	40484.5	42610.2	36653
A0A0H2ZEH2	11	3	87.7394	Bacterioferritin OS=Pseudomonas aeruginosa (strain UCBPP-PA14) GN=bfrB PE=3 SV=1	30590	33588.9	31068.5	44886.5	21436.3	21351.3	28059.9	27876	29603.8	31157.6	24038.2	24792.6	24180.9	21302.9	22508.6	19914.1	41112.5	43984.4	64069.8	58209.2	18553.4	18871.9	38973.4	34224.6	27536.8	27725.9	29372.5	30785.4	74901	66743	35372.7	30259.4
A0A0H2ZKI7	20	9	124.121	Type IV pili methyl-accepting chemotaxis transducer PilJ OS=Pseudomonas aeruginosa (strain UCBPP-PA14) GN=pilJ PE=4 SV=1	11114	13843.6	8983.63	10994.9	11920.4	11605.2	8935.1	8654	7495.64	7860.16	8438.58	9234.47	6252.93	7464.35	5873.16	5992.62	12532.4	13577.4	14116.1	13252.9	10075.3	9922.85	10704.7	11494.5	8721.31	8098.09	6266.41	5983.76	14478.4	16475.2	8446.97	7134.41
Q02FT2	73	26	470.842	Polyribonucleotide nucleotidyltransferase OS=Pseudomonas aeruginosa (strain UCBPP-PA14) GN=pnp PE=3 SV=1	127840	134037	129537	136549	141062	144156	95925.4	97447.8	112035	119625	93811.5	95600.5	104554	110361	96945	94785.7	146799	151501	167333	154622	171787	166385	189840	201292	103384	100381	101758	102309	146427	149148	132608	131168
A0A0H2ZFK1	9	4	75.8217	Inorganic pyrophosphatase OS=Pseudomonas aeruginosa (strain UCBPP-PA14) GN=ppa PE=3 SV=1	28097.8	28655	28718.2	28363.4	34081.6	35126.2	16350.3	17994.5	25466.6	32979.8	22485.7	23646.6	34880	29135.3	28373.9	25918	39098.2	42355.6	55583.4	41300	46015.8	46887.2	44149.9	38831.8	29082.5	26357.7	30859.7	27546.4	59542.5	57178.4	41355.9	37183.6
A0A0H2ZHD3	4	1	22.2329	Uncharacterized protein OS=Pseudomonas aeruginosa (strain UCBPP-PA14) GN=PA14_61430 PE=4 SV=1	4598.42	4209.05	5713.37	5716.33	4795.88	4391.02	3939.34	3570.28	2847.3	3178	2854.6	3136.5	2559.88	2553.33	2900.89	2672.6	2848.86	3015.83	3254.03	3374.17	3314.84	3219.03	3675.45	3816.44	2953.85	3291.23	2773.09	3198.02	3527.09	3336.39	3686.23	3059.43
A0A0H2Z8N6	16	5	108.378	Peptidyl-prolyl cis-trans isomerase OS=Pseudomonas aeruginosa (strain UCBPP-PA14) GN=ppiB PE=3 SV=1	54523.6	75313.5	59842.3	71005.3	49672.4	49403.4	33233.5	36271	31761.9	48470.3	34487.9	34738.4	42396	49055.9	36905.9	36037.2	33535.8	50747.2	72730.6	67314.4	60741.1	59373.1	77390.6	88066.1	30108	35656.2	39219.9	36838.3	87889.8	95363.4	53739.9	44493.8
Q02NQ8	1	1	6.2765	Ecotin OS=Pseudomonas aeruginosa (strain UCBPP-PA14) GN=eco PE=3 SV=1	2580.02	1786.82	2923.71	2199.71	2731.02	4206.68	2405.85	2507.65	1790.13	1430.05	1486.26	1538.86	2129.14	2495.15	1043.34	1455.89	1986.2	2756.85	2108.96	3072.45	2060.59	2445.64	3980.43	3258.92	1769.16	1642.55	1624.19	1533.21	2949.69	4034.51	2179.15	2077.82
A0A0H2Z9D0	56	24	359.98	2-oxoglutarate dehydrogenase E1 subunit OS=Pseudomonas aeruginosa (strain UCBPP-PA14) GN=sucA PE=4 SV=1	117288	141449	123221	140729	124954	107291	84673.4	86072.7	119822	149946	94917.9	96859.5	104183	101036	105255	99897.5	150506	166376	162615	161420	176312	182382	202450	209576	103888	98446	99112.6	99652.3	131898	133039	146364	119470
Q02SM0	5	2	28.5391	6,7-dimethyl-8-ribityllumazine synthase OS=Pseudomonas aeruginosa (strain UCBPP-PA14) GN=ribH PE=1 SV=1	7126.46	7494.97	7127.5	9207.49	7391.03	8224.35	5130.06	6182.03	7273.07	7469.21	5998.4	6344.77	8313.66	7999.85	5864.76	6505.55	8907.88	8905.23	11439.9	11772.4	9313.6	10713	13914.3	15316.5	7461.18	6503.26	6313.27	6851.91	11582.6	11708.7	9000.11	8464.63
A0A0H2ZI14	32	8	198.221	Putative binding protein component of ABC transporter OS=Pseudomonas aeruginosa (strain UCBPP-PA14) GN=PA14_64900 PE=4 SV=1	16377.6	21559	15484.7	19516.4	18031.3	17569.9	14423.5	16022.1	27937.9	30129.9	20696.5	21374.3	27606.6	27671.5	25697	25624.7	26581.8	28995	24212.7	26189.4	35537.9	36766.3	23166.2	23526	17704.2	21690.6	24455.1	24785.2	27223.7	30183	25827.5	27187.8
A0A0H2ZKH3	23	10	151.302	Fructose-1,6-bisphosphate aldolase OS=Pseudomonas aeruginosa (strain UCBPP-PA14) GN=fda PE=3 SV=1	38115.8	42430.1	51905.5	52266.1	45359.6	45061.6	31239.1	30167	27434.4	34321.2	25280.9	24652	32905.4	30470.3	28168.9	25835.5	36499.7	38048	48216.9	52384.2	50852.6	48857.1	50764.5	44574.9	27635.9	26477.2	30078.9	26793.6	45627.4	44091.6	35286.9	29893
A0A0H2ZKW2	8	3	55.5488	Type IV pilus response regulator PilH OS=Pseudomonas aeruginosa (strain UCBPP-PA14) GN=pilH PE=4 SV=1	7997.83	8238.31	3953.56	3022.89	10888.6	10701.7	6161.57	6020.14	11295.7	11839.2	9187.6	9017.65	11898	11819.1	9014.04	9771.6	10274.3	11322.3	10596.8	10597.9	14312.7	14255.1	9262.27	11245.4	9983.65	8893.6	8762.79	8587.34	10308.4	9597.73	11847.6	11410.6
A0A0H2ZCP3	10	1	57.1317	Long-chain-fatty-acid--CoA ligase OS=Pseudomonas aeruginosa (strain UCBPP-PA14) GN=fadD1 PE=4 SV=1	1002.23	620.387	1890.04	1182.92	2186.92	2247.53	1077.86	838.29	1007.58	1311.92	1142.03	1198.47	820.268	885.89	918.564	921.564	1226.76	853.663	876.869	903.874	1664.41	1647.01	1062.42	1087.5	1128.64	1094.48	648.229	692.913	500.616	375.122	1213.8	1204.57
A0A0H2ZKB6	13	1	65.1585	Putative chemotaxis transducer OS=Pseudomonas aeruginosa (strain UCBPP-PA14) GN=PA14_02270 PE=4 SV=1	581.001	225.96	10.8773	25.0198	285.305	240.523	95.359	132.66	240.946	271.316	374.948	302.669	422.784	380.834	338.316	238.464	285.264	209.365	310.858	66.0646	396.077	440.374	340.062	296.232	206.82	184.509	254.194	188	168.585	236.545	337.684	287.662
A0A0H2ZK98	26	9	135.603	Putative chemotaxis transducer OS=Pseudomonas aeruginosa (strain UCBPP-PA14) GN=PA14_02220 PE=4 SV=1	19836.7	21535.7	19798.9	23321.8	20833.4	19508.6	17308.5	17767.8	16004.4	16615	14694.5	13526.6	14137.7	14240.3	14030.5	14167.9	20249.3	20629.6	22642.1	26076.6	19257.7	21403.2	29822.6	28684.1	12963.2	15120.9	14603.5	14183.9	23589.1	22063.6	17510.6	16724.6
A0A0H2ZM25	11	6	61.3932	Cell division protein FtsZ OS=Pseudomonas aeruginosa (strain UCBPP-PA14) GN=ftsZ PE=3 SV=1	18035.7	19544.2	24078.8	20610.1	17628.9	16325	13922.2	15263.6	12150.7	14263.4	10129.3	11096.6	10282.6	11642.5	10262.6	10629.2	10338.2	12656.7	15457	14432.5	13154	12885.9	14156.5	22966.4	11647.4	11952.9	10059.2	9901.19	10746.5	13485.8	13685.9	13731.6
Q02KZ2	2	1	12.4074	Fe/S biogenesis protein NfuA OS=Pseudomonas aeruginosa (strain UCBPP-PA14) GN=nfuA PE=3 SV=1	895.416	224.896	164.854	0	656.571	434.961	2415.6	1822.75	329.951	62.5246	515.171	526.476	1950.34	1289.18	1359.25	781.66	2158.76	2389.86	1752.21	1416.25	1176.19	444.913	1034.88	213.572	430.52	1000.78	1523.26	1209.79	780.32	380.864	828.555	756.684
Q02RW8	37	13	261.022	Cysteine desulfurase IscS OS=Pseudomonas aeruginosa (strain UCBPP-PA14) GN=iscS PE=3 SV=1	36157.1	58020.5	50445.3	41411.5	41898	40216.2	35267.3	40123.8	40827.3	42129.1	39470	36268.4	31753.6	30935	32825.6	31940.9	51346.9	54866.6	71032.3	62536.9	44885	37764.9	66090.6	68547.1	45041.3	41974.4	40013.1	37689.7	51973.3	55441.2	48697.8	45025.5
A0A0H2ZHG7	3	2	17.195	Type 4 fimbrial biogenesis protein PilN OS=Pseudomonas aeruginosa (strain UCBPP-PA14) GN=pilN PE=4 SV=1	3644.36	3519.14	2533.52	1344.14	2831.64	3236.08	2197.3	2344.34	4326.42	4166.11	3382.65	3197.81	2300.72	2581.98	3115.67	3261.06	3501.73	3688.99	3824.83	3334.86	5732.1	5824.94	3854.72	4814.03	2151.31	3063.29	2480.17	2469.46	1873.02	2536.3	3485.79	4238.91
A0A0H2ZLY6	7	1	37.9798	Cyclic AMP receptor-like protein OS=Pseudomonas aeruginosa (strain UCBPP-PA14) GN=vfr PE=4 SV=1	754.749	599.5	305.202	664.536	1326.84	896.335	789.797	607.44	1186.78	1436.67	981.166	1232.65	661.471	856.332	626.466	853.253	1311.04	1452.06	382.193	1163.55	2419.38	2048.85	333.449	356.513	1324.07	875.867	604.126	727.951	720.297	821.719	1214.17	933.004
A0A0H2ZC84	20	5	123.398	Putative chemotaxis transducer OS=Pseudomonas aeruginosa (strain UCBPP-PA14) GN=PA14_29800 PE=4 SV=1	7939.58	10956.8	8557.16	9314.32	10740.5	9853.99	7779.72	7347.34	12722.3	13052.4	10883.3	10120.8	11087.7	11913.1	9458.79	9320.61	12405.9	14452.6	13858.6	14673	18798.2	17080.1	11859.4	12317.3	9904.23	10650.2	9949.79	10329.1	13216.8	13654.3	13653.9	13316.7
Q02FS8	66	21	401.49	Translation initiation factor IF-2 OS=Pseudomonas aeruginosa (strain UCBPP-PA14) GN=infB PE=3 SV=1	78231.3	82614.1	65993.7	68864.8	68747.2	66002.8	63302.1	60797.8	55105.1	52992.6	56061	53143.9	49389.9	52137	43946.5	46025	70986.7	67996.8	88138.9	87504	64445.2	63151.8	102576	104422	48714.1	48247	47393.2	48199.1	71053.3	70354.2	51574	52321.7
A0A0H2Z7E2	60	26	333.992	Glutaminase-asparaginase OS=Pseudomonas aeruginosa (strain UCBPP-PA14) GN=ansB PE=3 SV=1	365215	371312	325490	326516	425582	407808	248048	245384	331108	341582	259641	243678	374514	371443	273063	264404	440826	452963	528089	504717	491508	470420	519232	491955	257525	272879	315230	311320	564652	543222	353670	335912
Q02G03	20	10	159.258	50S ribosomal protein L25 OS=Pseudomonas aeruginosa (strain UCBPP-PA14) GN=rplY PE=1 SV=1	108866	110316	60462.8	55192.9	101575	94908.5	72184.3	75105.6	83382.4	87543.4	70938.3	72462.2	104876	104861	81562.3	85226.1	108114	117858	141747	148749	123741	119396	154055	159621	69918.7	70989.6	83768.8	84253.7	146986	149882	97584	92702.4
A0A0H2ZEN7	14	7	82.194	3,4-dihydroxy-2-butanone 4-phosphate synthase OS=Pseudomonas aeruginosa (strain UCBPP-PA14) GN=ribB PE=3 SV=1	4878.24	5223.02	7145.42	5230.25	6664.76	6865.22	3744.69	4154.08	10634.3	10187.3	6339.81	6601.24	8313.11	7804.4	7734.08	8551.35	6571.88	4937.23	4448.36	4825.68	7097.44	5792.62	4093.19	4595.55	8384.03	8586.73	8457.11	8852.37	6108.68	5569.18	9572.66	11371
Q02RA7	37	17	270.215	Enolase OS=Pseudomonas aeruginosa (strain UCBPP-PA14) GN=eno PE=1 SV=1	138671	170317	186984	199390	131004	125072	111281	111727	86142	89560.8	84555.5	88932.2	100174	93808.2	107858	101740	128572	137059	151420	136351	135946	132440	185786	179583	95536.3	98818.2	102053	108648	155132	141824	126132	108106
Q02PH8	35	14	211.174	Fatty acid oxidation complex subunit alpha OS=Pseudomonas aeruginosa (strain UCBPP-PA14) GN=fadB PE=3 SV=1	8185.61	10220.5	8592.01	6894.04	15694.1	18181.5	10820.9	9812.61	17546.1	17995.5	14388.1	14520.4	18733.6	17105.8	16844.4	16944.9	16232.5	20385.9	14131.9	14036.6	22635	22941.6	12442.1	11594.8	16028.7	17451.8	18829.3	17906.1	16656	13725.4	18973.7	19791.1
A0A0H2ZIT3	3	1	19.7725	Aminomethyltransferase OS=Pseudomonas aeruginosa (strain UCBPP-PA14) GN=gcvT1 PE=3 SV=1	15461.2	25003.9	20224.2	22230.9	15176.3	18709.3	13194	15988	15007.3	18503.3	13080.5	14212.6	12004.4	18777.5	13343.5	15465.2	20823.5	23691.5	27431.4	23251.8	17216.9	17326.9	27731.9	31382	17253.1	13783.4	17834.2	16526.2	22883.8	27311.9	19744.4	22115.9
A0A0H2ZI15	8	4	46.2796	Two-component response regulator CbrB OS=Pseudomonas aeruginosa (strain UCBPP-PA14) GN=cbrB PE=4 SV=1	1273.03	1429.28	1117.7	924.606	1396.18	1110.82	1013.93	1053.31	1706.22	1733.4	1645.55	1794.24	1304.03	1710.81	1584.02	1438.72	1459.41	1280.14	1926.79	1912.71	1836.67	1473.23	1166.98	1555.58	1461.51	1578.48	1886.36	1406.77	2116.6	2088.55	1879.77	2166.8
A0A0H2ZIR6	2	1	10.1168	Proline iminopeptidase OS=Pseudomonas aeruginosa (strain UCBPP-PA14) GN=pap PE=3 SV=1	19598.6	20772.4	12078.8	12822.1	16380.9	16809.6	15002.7	16392	19372.4	20537.7	17483.8	17656.1	18603.3	21250.3	18469.6	18543.7	20422	23304	21905.2	21465.6	21138.5	22194.8	17396.3	20280.2	17961.9	21701.2	23917	24549.7	29351.4	32698.8	24991.9	27487.4
Q02FX9	44	16	270.958	Ketol-acid reductoisomerase (NADP(+)) OS=Pseudomonas aeruginosa (strain UCBPP-PA14) GN=ilvC PE=3 SV=1	81336	81284.6	92368.4	102988	77658.5	78586	59222.1	59860.9	69196.7	73588.5	61538	60576.5	71723.3	69011.7	68890.5	65574.9	86342.7	87915.1	99335.2	87424.9	107527	105915	131105	133287	63295.8	61931.1	68554.5	64992.7	84132.9	82897.2	81813.5	80237.1
Q02T85	1	1	5.1176	30S ribosomal protein S12 OS=Pseudomonas aeruginosa (strain UCBPP-PA14) GN=rpsL PE=3 SV=1	4684.12	5522.29	7832.37	8161.53	4408.03	3820.56	3532.05	3613.66	3493.85	3865.55	2999.22	3504.62	2868.56	3925.29	2970.15	3181.15	4135.5	4556.55	5312.84	4433.88	2771.83	3798.66	4653.39	5786.34	3156.21	3664.79	3276.96	3638.25	3597.09	4952.79	4023.3	4120.5
A0A0H2ZBS5	26	8	182.292	Electron transfer flavoprotein beta-subunit OS=Pseudomonas aeruginosa (strain UCBPP-PA14) GN=etfB PE=4 SV=1	134449	153296	114983	127091	130587	124463	85094.6	88439.9	98390.6	104830	78125.9	77104.8	114657	108878	86576.8	77633.9	132618	139690	135252	157605	139478	134033	162143	154964	87105.4	81938.7	101712	95826.9	201465	195291	115423	99957
A0A0H2ZI82	2	2	15.119	Catabolite repression control protein OS=Pseudomonas aeruginosa (strain UCBPP-PA14) GN=crc PE=4 SV=1	202.979	81.8156	209.061	215.189	226.156	269.106	307.511	496.846	151.465	183.36	190.514	317.349	214.802	188.655	281.401	259.294	159.369	37.5874	334.52	107.399	323.834	68.9025	133.097	132.724	219.531	223.706	156.695	225.73	23.6658	70.1994	185.729	248.123
A0A0H2ZKT8	5	1	31.4799	Transketolase OS=Pseudomonas aeruginosa (strain UCBPP-PA14) GN=tktA PE=3 SV=1	3522.12	3833.9	6288.25	5576.99	3905.49	4038.02	3457.66	3624.72	4089.28	3552.46	4434.6	4418.68	3774.43	4822.06	4970.81	5109.61	4069.17	4846.2	6494.74	5396.17	5967.02	6297.4	11231.5	8699.89	4890.28	4371.56	3540.88	3004.08	7632.83	7060.92	5699.65	7296.06
Q02FR1	82	33	576.599	Chaperone protein DnaK OS=Pseudomonas aeruginosa (strain UCBPP-PA14) GN=dnaK PE=3 SV=1	248261	263638	273399	272857	273485	270185	166560	176012	216763	230546	178923	180337	216846	216746	173104	170159	262567	295324	307750	301130	335812	332565	302940	312196	194016	192998	214945	206929	304976	312499	258670	238540
A0A0H2ZG60	5	2	39.53	Peptidylprolyl isomerase OS=Pseudomonas aeruginosa (strain UCBPP-PA14) GN=ppiC2 PE=4 SV=1	1912.27	1543.35	1140.06	925.376	1861.74	1975.36	2453.87	2572.57	1538.87	1226.44	1313.98	1638.5	2190.56	2042.27	1896.38	1745.32	1534.91	1552.44	980.16	1224.24	1157.02	1336.69	1487.42	1659.3	2305.24	1769.57	1667.69	1995.55	2695.35	2052.75	2465.88	1948.75
A0A0H2ZJC8	4	2	22.9223	N5-carboxyaminoimidazole ribonucleotide mutase OS=Pseudomonas aeruginosa (strain UCBPP-PA14) GN=purE PE=3 SV=1	5290.57	5709.75	7497.95	4582.48	4991.54	4827.79	3453.95	3842.54	2789.59	3208.78	3383.6	3422.21	3217.32	3915.51	3336.54	2827.1	3846.14	3930.16	6538.48	4467.14	3903.3	4499.92	4851.15	4800.72	3740.88	3119.63	4863.81	4335.48	3850.08	4557.96	3817.53	3714.29
A0A0H2ZKQ5	5	2	38.2972	Uncharacterized protein OS=Pseudomonas aeruginosa (strain UCBPP-PA14) GN=PA14_04300 PE=4 SV=1	26043.6	29985.1	25748.5	25355.2	35495.7	35439.9	17188.4	17947.2	25478.7	29944	17792.8	17514.6	26624.5	28341.2	20672.7	20025.6	30432.6	37804.3	33416.2	31980.6	49096.4	48957.9	26706.8	28614.7	19142.5	20790.9	25749.2	24222.6	38355.8	42831.1	36453.3	33811.7
A0A0H2ZIU3	18	9	115.772	Thioredoxin OS=Pseudomonas aeruginosa (strain UCBPP-PA14) GN=trxA PE=3 SV=1	105304	118086	73280.4	96607.1	94563.9	96057.7	47420	50882.7	90975.4	96821.5	59598	60982.5	98380.6	99666.6	72749.6	75801.2	94435.7	111534	99225.7	105858	158935	161825	136287	138952	77064.8	69438.6	98556.5	97285.9	160987	152562	119870	107485
A0A0H2Z9L3	3	1	17.5953	Uncharacterized protein OS=Pseudomonas aeruginosa (strain UCBPP-PA14) GN=PA14_36530 PE=4 SV=1	379.797	273.159	787.717	1050.58	27.7715	39.243	629.87	503.844	438.363	385.041	320.304	340.554	243.308	330.642	294.459	341.022	627.675	560.623	712.034	709.31	510.129	255.193	135.08	218.804	506.954	281.903	376.813	538.033	712.645	1003.24	202.768	518.499
Q02T84	12	6	77.6895	30S ribosomal protein S7 OS=Pseudomonas aeruginosa (strain UCBPP-PA14) GN=rpsG PE=3 SV=1	38487.3	40517.8	55530.7	54572.6	71618.7	73570.2	32499.7	35170.9	34014.6	39088.7	39384.5	40112.5	31646.3	34132.4	25281.4	26243.3	37870.4	38762	45230.5	45433.5	49337.7	50134.8	41096.6	45460.8	39391.5	36746	22233.4	21549.3	29310.2	31591.9	39849.3	40877.9
A0A0H2ZCA6	19	5	92.2503	DNA gyrase subunit A OS=Pseudomonas aeruginosa (strain UCBPP-PA14) GN=gyrA PE=3 SV=1	8161.2	6493.01	6705.27	7173.22	9720.48	8755.02	5500	5060.37	6145.58	5850.8	4870.09	4917.53	5261.03	5245.11	4443.04	4497.12	7704.11	6964.63	8705.72	8069.17	8370.1	8827.89	7944.31	6712.17	5536.57	5319.91	4444.67	4797.63	6923.28	6800.13	7203.57	6155.84
A0A0H2Z8N2	80	34	507.478	Aconitate hydratase B OS=Pseudomonas aeruginosa (strain UCBPP-PA14) GN=acnB PE=3 SV=1	71307.7	76292.7	79407.8	84038.6	64890.7	63993.5	56741.2	56502.9	89863.2	93384.5	71226.6	73053	77830.2	79377.5	77288.6	73766.2	91210.3	98789	110619	107511	97519.2	101924	117523	120957	76283.7	76419	82453.6	79039.4	98063.3	99778.4	93441.5	93613.5
A0A0H2ZIV4	29	11	180.699	Glutamine synthetase OS=Pseudomonas aeruginosa (strain UCBPP-PA14) GN=glnA PE=3 SV=1	24000.2	25829.9	33230.3	33360.9	20389.1	21447.2	17073.5	17809.8	17711.7	19912.1	15634.5	15765.5	16168.3	16426.4	15838	16621.3	20434.2	21983.8	24771.9	24621.2	26711.8	24558.8	29736.5	32018.6	19596.9	16993	19116.6	18394.2	25882.4	26749.9	23315.3	22852
A0A0H2ZEH4	4	1	34.2048	Ferredoxin I OS=Pseudomonas aeruginosa (strain UCBPP-PA14) GN=fdxA PE=4 SV=1	14340	15767.8	18244.7	18459.1	12085.3	11600.3	9267.43	8470.27	9190.1	10190.9	7905.6	8163.43	10012.9	9513.92	7699.02	8330.62	9539.41	10563.5	13182.6	12531.3	10532.8	10146.9	14438	15131.8	9058.52	7389.88	9659.36	9349.69	17687	16607.7	12047.1	10928.7
Q02ET9	8	2	48.8703	Glucans biosynthesis protein G OS=Pseudomonas aeruginosa (strain UCBPP-PA14) GN=opgG PE=3 SV=1	1295.82	1727.02	459.35	129.677	5854.82	5275.65	1492.24	1239.79	2064.42	4469.68	2925.38	3281.2	3714.44	3328.66	3577.52	3257.87	1360.66	3897.38	1692.93	1389.84	8309.63	7591.42	592.101	560.667	3872.49	3174.99	3499.72	2736.12	2723.06	2072.75	5191.17	1229.97
A0A0H2Z780	7	3	43.4482	Uncharacterized protein OS=Pseudomonas aeruginosa (strain UCBPP-PA14) GN=PA14_53040 PE=4 SV=1	588.737	621.125	3823.99	3754.16	5524.94	4152.92	2580.96	2249.87	2914.74	2926.07	3950.27	3825.07	801.723	637.616	2645.1	1819.16	1172.11	1147.6	1016.43	541.462	5525.69	4018.49	1314.58	558.951	3950.45	3467.88	930.609	776.388	693.409	254.485	3477.87	2259.17
A0A0H2ZGD8	92	37	657.976	Elongation factor G OS=Pseudomonas aeruginosa (strain UCBPP-PA14) GN=fusA1 PE=3 SV=1	234497	238883	253268	240050	299312	285201	167665	156309	213029	234707	166418	165691	221675	216911	197927	192484	254359	267086	291907	293999	342487	322614	335929	335291	195318	192356	216377	209529	281305	275639	279413	262976
A0A0H2Z939;A0A0H2ZFS1	11	4	75.1306	NAD+ dependent acetaldehyde dehydrogenase OS=Pseudomonas aeruginosa (strain UCBPP-PA14) GN=exaC PE=3 SV=1	1714.89	1204.25	1266.48	953.974	1529.39	1085.65	2355.75	2253.43	2236.3	2290.06	2305.21	2317.18	2603.83	2280.9	2421.72	2262.28	1784.59	2074.38	1225.05	1862.76	1832.2	1610.22	1277.89	1606.84	1921.52	2251.24	2608.65	2199.35	1624.55	1427.45	2552.87	2243.78
Q02R89	5	1	27.3138	Protein RecA OS=Pseudomonas aeruginosa (strain UCBPP-PA14) GN=recA PE=3 SV=1	457.133	506.585	825.989	964.331	1306.93	906.607	1121.83	1158.72	630.738	537.67	799.153	859.345	492.331	368.159	579.28	554.811	393.76	496.439	344.974	516.466	903.123	1377.46	424.276	513.985	886.441	1075.15	559.418	489.945	366.234	384.631	644.463	749.224
Q02EN8	10	1	58.9713	Protein-export protein SecB OS=Pseudomonas aeruginosa (strain UCBPP-PA14) GN=secB PE=3 SV=1	24417.1	26860	36092.6	37504.5	25130.3	27820.5	16804.2	17993.5	18601.8	20704.1	16120.7	15900.9	18976.6	20589.7	14976.1	15627.4	24612.2	23469.8	30995.2	29802.7	25433.4	24632.7	25473.7	28013.7	16059	17322.9	18150.6	17299.8	31125	31511.6	23900	24534.1
A0A0H2Z8B3	4	2	21.9754	Uncharacterized protein OS=Pseudomonas aeruginosa (strain UCBPP-PA14) GN=PA14_46340 PE=4 SV=1	4499.46	4009.83	4704.79	5028.2	4740.56	4849.84	3123.17	3844.62	4114.99	4869.67	2904.02	3330.03	4044	3976.14	3569.68	3490.44	8594.73	8185.56	5717.63	4452.68	5496.37	5124.72	3663.54	4267.14	3986.92	4076.24	3260.71	3762.69	4843.44	5407.79	5132.34	5073.95
A0A0H2Z979	15	4	93.3209	Succinate dehydrogenase (B subunit) OS=Pseudomonas aeruginosa (strain UCBPP-PA14) GN=sdhB PE=4 SV=1	1917.95	1581.73	7694.79	5187.3	6024.76	6940.88	4396.57	4124.79	5717.91	5153.46	5175.93	4982.49	4821.96	5290.89	4222.36	3763.96	3258.14	3706.48	3597.23	3070.66	6565.66	5659.94	3117.59	3250.12	7112.77	4909.16	5079.77	4912.47	5837.51	7279.71	6735.21	6515.58
A0A0H2ZLA4	15	6	79.9586	RNA polymerase sigma factor RpoD OS=Pseudomonas aeruginosa (strain UCBPP-PA14) GN=rpoD PE=3 SV=1	8549.91	12141.4	8880.47	9032.97	10282.2	10494.6	11781.6	11143.6	8505.4	10066.5	7899.78	7538.61	8065.9	8036.16	7504.34	7761.63	8287.15	9402.72	8026.81	9304.8	12709.4	14450.7	13308	13291.1	6626.58	7956.62	5654.48	6652.75	7601.94	8196.67	8721.24	8133.8
A0A0H2Z7X4	25	10	151.551	Transcriptional regulator FleQ OS=Pseudomonas aeruginosa (strain UCBPP-PA14) GN=fleQ PE=4 SV=1	5414.26	6825.05	13005	13681.5	9046.06	10848.9	11789.6	10413.1	7586.84	8227.07	10756.3	10544.6	11599.9	10110.8	10451.9	10120.8	12338.8	15859.1	15066.3	15640.9	12360.9	12409.1	18036.7	16386.7	11282	13052.7	11724.6	11349.3	14763	15634.7	9816.76	8763.69
Q02T73	6	3	55.9199	50S ribosomal protein L16 OS=Pseudomonas aeruginosa (strain UCBPP-PA14) GN=rplP PE=3 SV=1	19509.4	17973.3	16715.3	14065.4	28673.1	28527.4	15654.3	16158.6	16597.3	17433.5	18832.5	20166.1	19495.4	20678.9	12269.8	12308	24308.2	26081.9	31802	31629.4	14165.8	15258.5	28154.4	33427.6	17931.4	17376.8	14096	14061.1	20099.4	20650.8	17360.8	19921.8
A0A0H2ZI43	47	24	292.888	Biotin carboxylase OS=Pseudomonas aeruginosa (strain UCBPP-PA14) GN=accC PE=4 SV=1	116346	124847	130164	139669	117375	121872	85720.7	85808.1	98974.8	105571	86196.8	87043.6	90966.8	84872.3	92186.4	87037.1	105790	122225	134727	150588	147248	144132	139110	145414	91181	90165.5	92465.3	83889.2	126256	123655	118105	107143
A0A0H2ZGL8	31	16	198.808	Rod shape-determining protein MreB OS=Pseudomonas aeruginosa (strain UCBPP-PA14) GN=mreB PE=4 SV=1	67269.7	71915.3	62061.9	62811.1	79136.4	69461.6	52289.9	52537.1	56896.4	64701.8	52201.1	53368.6	57579.2	62610.5	54463.4	57241	57905.2	66881.7	88727.4	87914.3	56484	57995.8	88205.5	100942	43889.2	46386	57471.6	50486.1	61128.4	57769.8	45108.4	45589.2
A0A0H2ZDI5	5	3	41.6037	Putative UDP-N-acetylglucosamine 2-epimerase OS=Pseudomonas aeruginosa (strain UCBPP-PA14) GN=orfK PE=3 SV=1	1734.77	875.605	1149.15	2454.81	1131.69	891.186	1422.25	999.201	827.472	923.68	922.954	907.774	991.729	896.565	995.311	719.395	435.672	978.09	1473.4	1447.05	310.528	215.773	1542.42	2059.21	1344.57	1152.62	1083.47	807.211	1104.88	1049.94	1268.94	1222.43
Q02QZ6	17	7	92.2746	Argininosuccinate synthase OS=Pseudomonas aeruginosa (strain UCBPP-PA14) GN=argG PE=3 SV=1	13072.4	15519.3	13239.5	12675.5	12801.1	14182.6	9315.99	10585.6	12052.1	11994.2	11658.6	11808.9	12555.1	13161.1	11954.5	11909.8	14012.5	14575.7	21054	21204.3	15497.1	16185.9	20661.1	20814	12595.8	11059.6	12927.3	13633.3	20804.2	19198.8	16059.6	16072.1
A0A0H2ZJS0	1	1	5.1123	Uncharacterized protein OS=Pseudomonas aeruginosa (strain UCBPP-PA14) GN=PA14_01080 PE=4 SV=1	786.273	940	620.79	894.261	864.537	697.568	634.6	710.413	759.429	603.176	681.452	667.741	517.218	436.26	492.518	566.591	858.049	712.694	890.168	1192.24	835.407	993.024	679.413	826.206	547.041	559.877	438.065	533.785	887.23	755.552	886.727	831.82
Q02DM0	20	6	126.231	Thiol:disulfide interchange protein DsbA OS=Pseudomonas aeruginosa (strain UCBPP-PA14) GN=dsbA PE=3 SV=1	15193.5	18172.3	7305.78	4984.69	13148.4	13421	13137.8	15098.4	18755.9	20768.3	14556.7	15359.2	18723.2	21449.2	13946.3	13935.2	15405.8	17309.7	18825.6	18763.4	19978.6	20547.5	17446.1	20202.2	12189.4	14073.7	13425	13865.3	18779.1	21236.5	14688.2	15739.2
Q02F79	6	4	30.428	ATP phosphoribosyltransferase regulatory subunit OS=Pseudomonas aeruginosa (strain UCBPP-PA14) GN=hisZ PE=3 SV=1	3630.94	4878.97	4246.25	3472.05	4936.2	4830.95	4317.81	4120.45	5913.07	5957.17	5324.39	5264.44	4381.02	4105.27	5539.19	5216	5900.5	6517.14	6184.32	5472.43	7963.05	7014.69	6586.2	5124.77	5532.26	6069.82	4588.94	4413.51	6558.84	4940.24	6830.73	5667.1
A0A0H2ZGT4	21	10	113.74	Superoxide dismutase OS=Pseudomonas aeruginosa (strain UCBPP-PA14) GN=sodB PE=3 SV=1	203443	274919	97493.9	66313.3	168254	162777	113880	123959	232150	263070	167383	164936	208948	243159	193365	184741	145023	144483	149805	127026	181339	154372	110042	112548	134304	127282	182798	169934	146349	142419	169498	172414
A0A0H2ZK38	11	4	69.3797	Uncharacterized protein OS=Pseudomonas aeruginosa (strain UCBPP-PA14) GN=PA14_05060 PE=4 SV=1	2871.96	2598.15	3852.72	2959.18	4337.14	4555.7	3630.36	4659.28	3872.44	3452.42	3820.53	3900.83	4061.6	4432.92	3158.58	3497.82	5443.67	5480.15	5055.18	4431.2	5742.88	6254.01	5657.17	5273.23	4502.12	3961.73	3829.93	3701.5	3903.87	4783.65	4491.42	5264.01
A0A0H2ZHI6	4	1	18.7376	Putative binding protein component of ABC transporter OS=Pseudomonas aeruginosa (strain UCBPP-PA14) GN=ybeJ PE=4 SV=1	1602.9	1983.5	392.549	200.246	296.094	291.63	907.363	1027.6	703.551	539.415	879.152	869.006	1344.8	1177.79	1086.52	1132.28	871.446	811.28	1392.37	1195.96	878.76	670.804	1635.38	1635.71	695.492	694.784	1327.04	1175.57	1967.18	1618.68	1411.89	962.317
A0A0H2ZIU6	3	1	15.3105	Putative membrane fusion protein OS=Pseudomonas aeruginosa (strain UCBPP-PA14) GN=yhiI PE=4 SV=1	926.595	602.934	1125.55	1195.77	2711.74	2583.65	1362.17	1500.17	1539.82	1555.27	1352.69	1739.11	762.103	1066.15	1575.91	1491.25	1453.26	1519.55	1133.53	1556.45	4302.15	2973.04	1800	1527.12	1918.63	1780.3	993.614	1262.55	631.974	779.097	1904.96	2054.2
A0A0H2ZJJ5	14	7	99.1463	Putative periplasmic transport protein OS=Pseudomonas aeruginosa (strain UCBPP-PA14) GN=PA14_73120 PE=4 SV=1	59468.4	64664.9	49015.4	53106.6	56614.6	59208.2	41410.7	45164.2	34329.1	38385.7	28940.9	30755.1	43299.1	44778.3	35463.9	36592.9	40239.9	41020.9	43621.6	51195.9	46872.5	45184.2	61764.1	67463	25772.1	29549.2	38777.8	38121.6	53780.3	60162.6	32718.6	34780.9
Q02T86	135	55	846.954	DNA-directed RNA polymerase subunit beta' OS=Pseudomonas aeruginosa (strain UCBPP-PA14) GN=rpoC PE=3 SV=1	192256	191682	158651	140624	204044	209849	155975	158124	179257	187807	149423	147664	166608	181892	158700	159799	217825	220064	227777	232465	264046	268883	252805	261917	164306	157204	187497	183466	192346	188186	187611	192120
A0A0H2Z721	3	1	15.4549	Uncharacterized protein OS=Pseudomonas aeruginosa (strain UCBPP-PA14) GN=PA14_48860 PE=4 SV=1	8759.59	8473	3452.12	7167.94	9118.41	6840.35	4380.66	3913	1364.25	8359.86	4063.11	5029.54	4860.37	5522.75	5415.57	6359.27	1270.21	7755.99	7719.8	6347.51	8854.3	9539.97	8352.12	10009.4	4782.69	5184.79	5682.56	3341.94	9130.58	9415.75	7729.15	1013.91
A0A0H2ZDC3	29	11	171.214	Aminotransferase OS=Pseudomonas aeruginosa (strain UCBPP-PA14) GN=tyrB PE=3 SV=1	17504.8	13887.5	14026.8	11182.3	18298.7	15226.1	11822.1	12206.9	11162.8	10852.9	10878.3	10169.5	8896.2	9015.75	8776.95	8792.09	13960.8	13217.8	14998.2	14399.8	11379.3	10975.7	14832.2	16435.2	10372.4	9847.35	8581.93	8624.3	13136	13844.9	11577	10899.9
A0A0H2ZFE6	15	7	89.1182	Fumarate hydratase class I OS=Pseudomonas aeruginosa (strain UCBPP-PA14) GN=fumA PE=3 SV=1	20142.4	23474.4	21485	22458.3	21497.5	20753.8	17246.9	18349.2	24043.7	26420.8	18964.1	20721.3	18596.3	20651.2	18616.7	19093.1	24787.5	25724.3	30348.4	35042.3	24258.9	26281.2	34656.9	38712.5	20811.5	21205.6	19149.4	19741.1	27368.9	28452.3	27952.4	29848.2
A0A0H2Z7U8	1	1	4.6711	Uncharacterized protein OS=Pseudomonas aeruginosa (strain UCBPP-PA14) GN=PA14_50240 PE=4 SV=1	1478.95	936.628	846.578	1347.66	692.895	1517.83	813.152	896.035	1445.43	1672.82	1073.59	1328.61	1112.65	1387.57	1132.33	1393.11	1024.59	875.455	1110.48	1083.27	2681.78	1221.85	345.116	596.079	1541.65	1537.37	2005.61	1100.38	1331.45	1418.97	2041.78	1386.54
Q02KT5	5	2	23.7151	Glutamine--tRNA ligase OS=Pseudomonas aeruginosa (strain UCBPP-PA14) GN=glnS PE=3 SV=1	4028.6	4100.41	3547.2	4763.37	3631.1	3358.77	3484.11	3269.24	4439.54	4490.42	3848.8	3754.71	3016.44	3066.66	3712.56	3949.88	4697.17	5214.35	5196.21	4923.18	6472.38	6320.66	5076.65	5829.86	4288.94	3797.65	3213.11	3037.01	4242.2	4245.96	4933.4	4723.13
Q02QI1	4	2	22.9972	STAS-domain containing protein PA14_20770 OS=Pseudomonas aeruginosa (strain UCBPP-PA14) GN=PA14_20770 PE=1 SV=1	253.045	349.62	184.647	0	925.534	471.581	1259.53	1708.41	861.914	408.951	866.928	628.606	1015.8	923.802	978.605	569.77	1502.85	738.254	650.578	354.285	361.01	294.022	395.24	297.023	634.7	1304.54	1172.2	986.942	756.873	904.299	478.409	406.441
A0A0H2ZDN3	11	3	69.3312	UDP-N-acetyl-D-mannosaminuronate dehydrogenase OS=Pseudomonas aeruginosa (strain UCBPP-PA14) GN=orfH PE=3 SV=1	5428.51	6319.93	4980.06	3682.54	5610.04	8294.13	4440.81	4545.49	4633.76	5158.42	3256.22	3736.63	3550.32	4031.4	4052.38	3735.53	4813.75	5293.7	4634.07	5203.54	6743.75	6596.86	4882.86	5861.8	3293.23	4109.99	4449.04	4162.92	3157.61	3931.71	3799.08	3542.73
Q02NB5	71	31	497.653	Isocitrate dehydrogenase [NADP] OS=Pseudomonas aeruginosa (strain UCBPP-PA14) GN=icd PE=1 SV=1	203689	222308	212358	216644	206755	212910	142922	144361	217054	242940	162429	158422	203843	218271	169723	165612	247057	265170	263014	254866	291550	315111	282026	302899	185146	179312	191009	188079	252899	262137	236138	232654
A0A0H2ZCF0	10	4	78.2352	Uncharacterized protein OS=Pseudomonas aeruginosa (strain UCBPP-PA14) GN=PA14_27870 PE=4 SV=1	11222.8	10026.5	5198.74	4322.22	6047.35	6640.64	7933.78	8265.31	5798.52	5496.07	5284.19	5211.48	6493.94	6899.28	4278.16	4739.3	7811.64	7328.14	10866	9747.26	5176.88	5054.91	8386.96	9463.68	5687.11	5030.18	4491.26	4810.99	10762.5	10916.8	3791.8	3595.04
A0A0H2Z8W8	42	28	252.787	Dihydrolipoyllysine-residue succinyltransferase component of 2-oxoglutarate dehydrogenase complex OS=Pseudomonas aeruginosa (strain UCBPP-PA14) GN=sucB PE=3 SV=1	311773	329884	321740	344809	290943	287127	186301	187484	283608	300260	226873	233429	277971	280820	222863	244459	293515	311773	363257	373276	363415	354880	452744	476117	233957	226754	279314	281260	457646	458213	321963	324883
A0A0H2ZHN3	17	6	78.9614	Uncharacterized protein OS=Pseudomonas aeruginosa (strain UCBPP-PA14) GN=PA14_62690 PE=4 SV=1	17791.7	20221.6	31242.9	27579.5	28528.2	27370.4	16355.5	16436.1	15951	21831.4	14982.4	13959.6	15527.2	16130.4	16420.1	14885.3	17631.5	21085.8	18205.9	17679.9	19153.3	22260.7	20152.2	27681.3	14041.1	15835.7	14753.2	17349.2	16440.6	18504.8	16910.3	14805.5
Q02K73	45	26	330.56	Succinate--CoA ligase [ADP-forming] subunit beta OS=Pseudomonas aeruginosa (strain UCBPP-PA14) GN=sucC PE=3 SV=1	278861	298157	311756	319024	358853	343950	188191	192560	346064	359381	232599	233587	301492	298541	267352	268098	373647	381199	400033	370840	478298	472983	406334	418332	287391	272271	274902	259853	425101	396484	379913	347211
A0A0H2Z7A9	20	4	101.855	Acetyl-coenzyme A synthetase OS=Pseudomonas aeruginosa (strain UCBPP-PA14) GN=acsA PE=3 SV=1	3569.88	3412.05	4646.93	2825.69	5471.96	5208.51	4317.07	4452.3	5285.25	5489.05	5392.7	5463.94	7193.95	7404.07	5969.01	5841.73	5021.28	4684.89	3966.28	4004.1	5059.87	4223.55	3320.54	3793.2	5710.14	5540.05	7167.38	6643.96	5680.68	5336.86	6442.06	6081.09
A0A0H2ZLM2	49	20	339.238	Putative ABC-type phosphate/phosphonate transport system, periplasmic component OS=Pseudomonas aeruginosa (strain UCBPP-PA14) GN=PA14_21175 PE=4 SV=1	77930.1	86667.7	81578.7	79714	87590.2	86675.1	50812.9	54942.6	68571	76821	54480.9	54824.4	62785.9	65722.7	63894.2	64471.8	84103.6	84467.9	87295.4	88983	84598.2	87986	104652	110737	63812.2	62000.5	71204.8	73567.1	88768.6	90976.5	79838.9	81073.2
A0A0H2ZC87	15	3	85.7741	Putative chemotaxis transducer OS=Pseudomonas aeruginosa (strain UCBPP-PA14) GN=PA14_29760 PE=4 SV=1	4524.64	2375.32	3167.15	2097.9	3802.2	3824.69	2430.09	2728.47	3037.18	2376.29	2500.48	2552.37	2701.89	2528.74	2878.26	2809.87	2702.04	2021.07	2394.34	2001.84	2066.41	2201.32	1947.93	2157.52	2272.84	3385.36	3222.49	3395.78	2878.76	2444.24	2695.42	3069.89
A0A0H2Z9E2	8	4	56.2348	Uncharacterized protein OS=Pseudomonas aeruginosa (strain UCBPP-PA14) GN=PA14_41740 PE=4 SV=1	49392.5	54001.3	82964.4	95074.8	46233.7	44759.5	33715.7	38645.3	48549.8	63736.3	54327.5	50020.9	48602.2	40572.6	58699	48836.9	55491.2	70289.6	85995.1	93448	61878.8	51359.4	71629.7	57131.5	79137	69008.6	71762.7	65883.6	95840.3	77569	75941.1	53938
A0A0H2Z7E7	56	34	399.402	Putative binding protein component of ABC transporter OS=Pseudomonas aeruginosa (strain UCBPP-PA14) GN=ybeJ PE=4 SV=1	539585	556505	447957	511676	571907	543014	319876	305931	400228	466107	311399	310316	426543	435791	373980	380652	508790	544322	498000	504443	631200	611760	538846	579948	350696	349641	471631	433873	722649	704440	510397	462368
A0A0H2ZHQ7	12	3	65.6672	Ribosome-binding ATPase YchF OS=Pseudomonas aeruginosa (strain UCBPP-PA14) GN=ychF PE=3 SV=1	2283.68	2806.08	4163.89	2966.83	2875.83	3050.69	2026.01	2352.12	2304.5	2579.98	2888.01	2882.21	2908.89	2764.72	2640.71	2396.85	2714.86	3362.96	4293.65	4131.44	3284.83	3269.04	4656.44	4674.59	3362.45	2931.08	2873.89	2707.08	4358.73	4456.87	4304.99	3851.68
A0A0H2ZL00	4	1	21.7915	Polyamine transport protein OS=Pseudomonas aeruginosa (strain UCBPP-PA14) GN=spuE PE=4 SV=1	737.268	698.959	165.232	123.825	497.499	662.452	423.952	440.287	349.107	355.322	361.46	284.976	869.067	545.018	411.638	228.24	267.933	245.974	181.737	307.081	572.696	327.775	733.883	628.407	541.557	396.77	627.605	658.919	877.053	733.104	469.702	333.444
A0A0H2ZFN5	7	2	41.8826	Uncharacterized protein OS=Pseudomonas aeruginosa (strain UCBPP-PA14) GN=PA14_57690 PE=4 SV=1	5485.9	3679.39	4617.49	1786.43	9740.32	8612.38	5375.69	4643.82	11326.9	12011.4	8182.68	7996.43	5528.31	5123.65	6347.21	5885.83	6243.79	6571.71	6143.61	5149.41	13461.7	13297.7	5980.15	3898.05	8061.51	8327.97	4992.16	4744.84	5403.16	3764.43	11305.8	10526.3
A0A0H2ZFE1	2	1	17.3603	Putative universal stress protein OS=Pseudomonas aeruginosa (strain UCBPP-PA14) GN=PA14_56220 PE=4 SV=1	1724.97	1103.84	1256.09	1205.59	1683.01	1435.35	1632.33	1553.03	1126.73	1022.04	982.665	941.941	1202.95	795.123	1110.83	1013.54	1645.28	1152.91	1537.19	1139.2	1426.95	818.182	1074.24	943.379	1203.86	1025.43	1157.31	1085.49	1586.34	1268.31	1236.62	808.572
A0A0H2Z7A1	28	10	210.632	Arginine/ornithine binding protein AotJ OS=Pseudomonas aeruginosa (strain UCBPP-PA14) GN=aotJ PE=3 SV=1	23164.2	21965.2	22821.4	19597.8	20442.9	20540.7	18487.3	19292.5	30077.6	28704.6	30586.5	31212.5	19125.5	20739.8	24573.7	24520.3	19020.8	17069.2	21426.6	20370.3	18589.5	17632.4	20079.4	22639.5	31871.1	29370.5	18488.8	19170.3	22511.7	24501.2	36622.8	39120.9
A0A0H2ZID8	46	16	323.605	Acetyltransferase component of pyruvate dehydrogenase complex OS=Pseudomonas aeruginosa (strain UCBPP-PA14) GN=aceF PE=3 SV=1	42894.1	45318	48648.2	46111.2	45000.4	46925.1	38444.5	35856	45343.1	44091.6	38249.5	37335.3	41966.6	41424.4	37605.1	36602.6	45277.7	47478.3	57311.1	56881.2	58014.8	60695.6	64384.7	64977.2	38527	38019.6	43122.8	41090.1	50658	52480.2	45322.7	48663.9
A0A0H2Z7L6	24	7	143.703	Acetylornithine aminotransferase OS=Pseudomonas aeruginosa (strain UCBPP-PA14) GN=aruC PE=3 SV=1	14038.3	13648.2	11086.9	13268	8041.37	7569.53	12047.8	11406.1	14433.7	13588.8	12299.8	11011.6	14655.6	13155.2	13623.3	13104.6	13526.5	15200.6	18680.7	17212.6	16164.8	14779.3	18037.3	14149.4	15156.4	15639.1	15977.1	16389.9	18822.3	16690.6	14026.7	14123.3
A0A0H2ZGY1	17	8	95.2583	Putative methyl-accepting chemotaxis protein OS=Pseudomonas aeruginosa (strain UCBPP-PA14) GN=PA14_58650 PE=4 SV=1	4987.94	4847.35	6903.61	6633.35	5901.44	5951.01	6378.08	6689.09	8451.92	7425.99	9693.93	7440.34	8741.38	8381.6	9348.35	8210.87	5237.34	6651.42	6635.55	5312.99	7248.17	4994.37	8285.01	5754.94	6045.51	7839.86	9096.91	8433.46	4308.24	4015.72	4280.61	4667.05
A0A0H2ZDX5	32	18	172.252	Binding protein component of ABC phosphonate transporter OS=Pseudomonas aeruginosa (strain UCBPP-PA14) GN=phnD PE=4 SV=1	56033.7	75515.9	38416.6	35891.9	36399	32853.5	42009.5	43289.5	55776.7	62352.6	63963.3	58729.4	65319	66520.8	63468.2	61870.7	48450.9	50247	60725.5	45676.5	40336.8	37624.2	61847.5	64333.3	51693.4	57708.2	60684.9	57471.9	82250.1	82667.4	58944.1	51869.1
A0A0H2ZJ30	8	3	47.2302	Glycine cleavage system H protein OS=Pseudomonas aeruginosa (strain UCBPP-PA14) GN=gcvH1 PE=3 SV=1	27253.8	27671.4	31698.1	36713.1	21819.6	20134.1	18769.6	19426.3	22552.1	27973.7	16653.3	15889.5	19432.2	19842.7	17792.7	18812.1	20647.3	23944.8	24313.9	21665.3	26237.6	31587.1	28729.3	36543.6	17284.1	15786.5	19902.9	17498.3	19553.2	20583.7	23832	18714
A0A0H2Z960	8	2	46.5818	Putative cytochrome c oxidase subunit OS=Pseudomonas aeruginosa (strain UCBPP-PA14) GN=ccoO PE=4 SV=1	1618.16	1310.15	2163.98	2159.21	1983.81	1861.03	1618.44	1711.06	2265.34	1517.55	2096.06	2265.49	1992.53	1759.25	1449.58	1532.24	1543.16	1347.34	1408.03	1305.81	1538.44	1147.59	1277.46	1116.89	2536.8	2128.3	1441.87	1428.82	1099.33	1337.1	1718.58	1681.31
A0A0H2Z6N8	12	7	81.2338	Uncharacterized protein OS=Pseudomonas aeruginosa (strain UCBPP-PA14) GN=PA14_50740 PE=4 SV=1	48176.6	53570.7	77007.5	82685.5	70731.3	67642.1	36729	38112.6	57857.5	68517	40216.3	42248.5	30523.8	31379.1	35063.3	35319.8	50106	53268.8	52750.9	48662.5	64938.7	75278.1	48306.5	55390.7	45812.9	46152.1	30958.2	33329.5	41816.4	44440.8	54959	51588.3
A0A0H2ZGN2	3	1	18.6721	Putative binding protein component of ABC transpor OS=Pseudomonas aeruginosa (strain UCBPP-PA14) GN=PA14_58390 PE=4 SV=1	5373.21	5472.05	5818.93	5345.35	5307.69	6455.16	3942.47	4134.23	4441	4248.91	3749.8	3508.18	3078.33	3944.88	3343.74	3764.45	4610.45	4035.28	5482.53	5227.86	3955.7	4890.51	4992.85	5228.32	4976.91	4038.62	5049.64	4686.69	5692.42	5667.24	4642.75	5818.19
Q02F98	14	6	101.047	NH(3)-dependent NAD(+) synthetase OS=Pseudomonas aeruginosa (strain UCBPP-PA14) GN=nadE PE=3 SV=1	12727.4	10712.7	8417.76	9631.27	11908.3	10957.2	9192.4	8749.54	13181.9	12395.6	10201.6	10113	13143.4	12142.1	11057.3	8997.32	14075.5	12815.6	12929.8	13592.3	14225.6	14591.5	15672.1	16366.5	11775.8	8522.93	10915.8	11864.5	16519.7	16768.4	13145.3	13772.9
A0A0H2ZGT5	9	3	59.9468	Putative ribosomal subunit interface protein OS=Pseudomonas aeruginosa (strain UCBPP-PA14) GN=PA14_57950 PE=4 SV=1	8218.15	9906.65	7119.25	8749.3	15238.5	16731.7	7445	7412.94	10896.3	16736.4	9793.5	9553.68	12938.9	13629.4	10333.5	10328.6	11828.4	12750.8	12457.2	11615.8	16353.7	17327.8	9766.06	10446.6	16295.4	14756.7	10689.3	11187.2	18737.3	17877.4	14072.1	8592.57
Q02RF8	26	14	150.464	Adenylate kinase OS=Pseudomonas aeruginosa (strain UCBPP-PA14) GN=adk PE=3 SV=1	49644.7	53374.9	51068.2	62369.1	45578.5	42398.8	34240.4	37308.5	50548.9	53031.5	37919.4	36540.3	42809.8	44617.3	40215	42937.2	49841.3	49708.4	60224.2	56273.7	63275.5	60841.5	73368.1	68705.4	44976.9	45109.1	45586.8	46804.8	67809.1	72816.8	52031.5	52558.3
A0A0H2ZEK0	8	3	53.3401	2,3,4,5-tetrahydropyridine-2,6-dicarboxylate N-succinyltransferase OS=Pseudomonas aeruginosa (strain UCBPP-PA14) GN=dapD PE=3 SV=1	5216.44	3933.24	3900.56	3574.83	6599.36	6855.7	4507.41	4517.27	5556.16	5726.39	5567.51	5761.12	4831.76	4361.32	5507.96	5836.78	6625.24	5597.64	6476.7	5243.66	7470.26	6177.31	3771.92	4298.01	6441.53	7185.97	5866.7	5839.47	7288.43	6488.96	7626.22	7354.38
A0A0H2ZIP1	30	14	213.037	Putative LysM domain protein OS=Pseudomonas aeruginosa (strain UCBPP-PA14) GN=ygaU PE=4 SV=1	47542.4	54595.9	84222.3	99428	145928	139472	65442.5	67856.8	71577.7	99164.3	81889.2	75912.6	82110	88239.4	61520.2	62698.9	68744.3	83256.5	77393.7	80797.9	163791	177334	103910	106001	82718.1	79591.8	64880.3	61727.2	131329	122804	100467	79725
A0A0H2ZC47	21	8	136.084	Putative nitroreductase OS=Pseudomonas aeruginosa (strain UCBPP-PA14) GN=PA14_30800 PE=4 SV=1	5505.21	4971.14	9290.54	8572.62	5972.56	6332.58	4763.66	4513.69	4674.86	4460.17	4294.52	4062.4	4427.49	5016.26	4484.62	4737.74	4424.85	5219.18	6410.75	5620.55	3496.31	3855.65	5649.23	6102.86	5199.05	4941.74	5585.23	5481.5	5683.37	6196.93	5445.18	5897.8
Q02RY8	24	8	126.234	Probable cytosol aminopeptidase OS=Pseudomonas aeruginosa (strain UCBPP-PA14) GN=pepA PE=3 SV=1	18850.9	20306.2	17810.8	18622.4	18926.2	17005.3	16142.1	15957.9	17529.2	15963.3	12041.6	12025.1	12039.3	11332.8	12141.6	12761.8	19394.3	17789.9	18127.1	19724.3	17669.7	17368.6	18302.9	16755.4	15268.5	14034.6	13411.2	14625.8	19692.4	18708.6	16097.9	18342.1
Q02KR1	45	19	265.181	Phosphoenolpyruvate synthase OS=Pseudomonas aeruginosa (strain UCBPP-PA14) GN=ppsA PE=1 SV=1	77415.5	83781.1	93347.6	97409.8	71512.3	75928.9	55936.3	57913	66484.1	71324.1	54786.7	57079.9	63118.6	65919.8	59307.2	61157.4	79146	87500.5	91884.9	91542.5	76871.6	82100.3	83359.2	90709.1	69449.8	65055.4	79532.4	78967.1	97721.7	99772.4	83999.6	81075.3
A0A0H2Z9S0	5	2	41.8213	Putative sterol carrier protein OS=Pseudomonas aeruginosa (strain UCBPP-PA14) GN=PA14_40860 PE=4 SV=1	24285.7	28637.7	8820	10098.5	35922.9	36046.9	14691.6	14068.3	30205.4	33948	17293.3	17280.7	36867.6	36472.1	21409.3	23674.8	20601.2	23222.8	12177.3	12973.7	44950	41503	10033.7	10408.7	20720.5	20081.8	27680.1	27790	32556.7	29990	39625.5	36796.4
A0A0H2ZIR4	40	20	236.143	Putative ABC transporter, periplasmic binding protein OS=Pseudomonas aeruginosa (strain UCBPP-PA14) GN=PA14_72640 PE=4 SV=1	66825.9	78070.5	50667.4	54378.6	47512.4	44546	49778.5	52961.5	74789.5	75211.4	48657.7	51115.7	81688.3	88929.6	67456.4	66176.2	55644.6	66265	81211.4	82060.7	71065.1	78074.5	85532.9	86150.2	45591	49760.7	81173.8	80730.6	87728.7	91069	59258.2	62849.7
A0A0H2ZM32	50	18	297.702	NAD-dependent glutamate dehydrogenase OS=Pseudomonas aeruginosa (strain UCBPP-PA14) GN=gdhB PE=4 SV=1	27341.6	28670.2	44414.9	43488.9	44749.9	45961.8	34114	36618.6	38354.7	44743.5	38410.6	37614.6	25303	25635.4	32819	30701.2	37628.8	41756.9	36919.3	39296.2	65250.1	61997.7	46915.7	42700.2	41494.5	42461.2	22353.6	21698	28627.5	28780.1	47755	41677.5
Q02GN4	10	2	63.4607	Nucleoid-associated protein PA14_59050 OS=Pseudomonas aeruginosa (strain UCBPP-PA14) GN=PA14_59050 PE=3 SV=1	2199.35	2352.9	2379.53	682.712	2239.29	3122.4	2088.7	2048.57	1815.93	1928.26	2311.21	1767.86	2459.98	2369.89	1982.58	1747.32	2667.1	2883.35	3475.65	3635.89	1542.35	1796.86	2703.17	2570.02	2396.3	2214.98	2723.25	2258.03	4424.49	3930.26	2243.73	2089.13
A0A0H2Z6P5	15	6	85.1359	Citrate synthase OS=Pseudomonas aeruginosa (strain UCBPP-PA14) GN=prpC PE=3 SV=1	14856.6	13207.9	17288.2	18211.2	20112.3	17525	14584.8	12675	30122.7	27065.5	20747	20342.1	17719.6	15566.6	21284.8	21817.5	16368.4	16514.6	20175.6	17329.5	28901.3	24397	15234.6	14959.4	23279.7	21931.7	17051.4	17788.3	15470.6	14569.5	27844.6	26131.5
A0A0H2ZGD9	19	7	106.713	Insulin-cleaving metalloproteinase outer membrane OS=Pseudomonas aeruginosa (strain UCBPP-PA14) GN=icmP PE=4 SV=1	13035.2	14935.4	16002.1	18480	14301.9	13004.8	10886.6	11792.6	11707.6	12573.6	9839.23	9820.36	8923.99	9731.36	10302.4	9914.86	13861.4	11955.2	12003.2	12794.6	11165.9	10776	12289.1	14121.8	8688.37	10727.2	10075.7	10354.7	9386.21	10643.1	11204.3	11750.4
A0A0H2ZKX3	62	27	386.75	Uncharacterized protein OS=Pseudomonas aeruginosa (strain UCBPP-PA14) GN=prkA PE=4 SV=1	69571	75812.8	83569.4	84146.9	89922.1	92344.8	55532.6	55775.2	71635	96007.1	59139.1	61410.2	65532.8	65316.5	63158.1	61200.4	74260.2	86086.8	83918.2	79972.1	124665	121423	78678.3	84940.1	75704.8	72579.4	57728.5	65975	63739.2	65753.6	97275.1	75236
A0A0H2ZGS4	9	6	47.8559	Putative toluene tolerance protein OS=Pseudomonas aeruginosa (strain UCBPP-PA14) GN=ttg2D PE=4 SV=1	26545	21834	19296.2	18923.4	27502.1	26920.7	15276.7	16168.9	18899	18984.3	13541.4	13566.9	15462.3	16706.9	15081.2	15521.6	21534.7	18000.8	19798.4	18548.3	26690	25534.3	18245.1	18398.1	19967.7	16532.2	17194.1	15452.7	19398.7	21054.6	21146.9	20613.9
Q02T68	22	12	153.173	50S ribosomal protein L5 OS=Pseudomonas aeruginosa (strain UCBPP-PA14) GN=rplE PE=3 SV=1	59969.1	70101.9	89715.3	96943.9	81487.3	86699.5	57845.8	57353.5	66239.6	71318.5	57143.2	57304.7	49950	50479.9	53627.4	53983.2	59859.9	63806.8	78747.5	79944.3	87466.7	87339.8	80791.6	82624.2	57602.7	58234.3	50039.1	52537.4	67697.6	67764.4	69063.4	65881.9
Q02T56	22	6	164.918	30S ribosomal protein S4 OS=Pseudomonas aeruginosa (strain UCBPP-PA14) GN=rpsD PE=3 SV=1	16790.1	16629.6	17062.4	14511	20020.9	20209.4	14940.3	15048.5	11444.4	15675.6	14700	14383.8	14066.1	14595	12444.2	12596.8	16821.6	16445.5	20284.3	18734.7	13713.5	13498	22629.8	25573.7	12356.7	13014	12528.1	12425.2	16813.6	18261.6	14524.5	12891.1
A0A0H2ZHK6	3	1	14.8574	Putative lipoprotein OS=Pseudomonas aeruginosa (strain UCBPP-PA14) GN=PA14_61390 PE=4 SV=1	11509.1	14246.1	12540.4	15463.6	11890.5	12195.7	13142.7	12099.8	5470.5	12652.6	8661.64	8791.41	8722.46	8293.5	12324.5	11922.1	6661.76	11413.4	11332.3	11190.6	8558.58	9123.78	16147.2	17885.3	9737.44	11467.4	11888.2	11779	12363.2	11683.9	10289.8	5286
Q02NP1	8	3	48.6888	Threonine--tRNA ligase OS=Pseudomonas aeruginosa (strain UCBPP-PA14) GN=thrS PE=3 SV=1	15260.1	17962	24105.4	24831.1	19066.7	18883.8	13245.1	13262.8	16102.9	19157.7	14520.6	15553.7	12635.2	13414.2	13662.9	12481	16582.9	17682.5	20258.5	19585.7	21080.4	21780.6	19696.4	21001.7	13960.8	15258.2	12046.1	12210.6	17230.5	17816	20167.8	17956
Q02V73	5	2	26.6527	Glycine--tRNA ligase beta subunit OS=Pseudomonas aeruginosa (strain UCBPP-PA14) GN=glyS PE=3 SV=1	1333.85	492.304	1146.4	814.122	1484.51	975.566	939.516	695.443	1625.82	1347.49	1193.2	695.441	1993.19	1707.48	1104.54	887.744	1097.74	827.197	1713.97	1194.09	2004.82	1301.78	1546.33	840.637	933.187	1069.19	1143.09	822.08	1185.8	1162.08	827.585	729.328
A0A0H2ZIF6	5	2	28.5082	Type 4 fimbrial biogenesis protein PilO OS=Pseudomonas aeruginosa (strain UCBPP-PA14) GN=pilO PE=4 SV=1	2741.78	2380.64	3722.25	3943.93	2577.79	2438.79	4215.69	4384.33	3254.66	3039.16	3920.46	3560.91	1986.33	1922.48	3184.37	3302.17	2731.68	2358.53	1891.9	1968.25	7480.03	5982.35	3619.22	3704.58	3217.7	4022	1902.32	2254.26	1631.39	1580.68	4018.36	3618.42
A0A0H2Z8J7	56	17	337.269	Gamma-glutamyltranspeptidase OS=Pseudomonas aeruginosa (strain UCBPP-PA14) GN=ggt PE=4 SV=1	52485.6	55327.3	57708	56432.5	63667.4	59737.7	41003.1	42380.5	51799.3	56456.2	46164.1	46909	55161	57405.2	45021.2	46828.7	56239.5	58804.1	74189.3	68780.6	61099.3	61306.8	78534.3	81782.7	51484	46319.3	57112.2	55276.1	83771.2	89497.2	63294.4	61630.9
A0A0H2ZGF1	15	7	92.686	Uncharacterized protein OS=Pseudomonas aeruginosa (strain UCBPP-PA14) GN=PA14_61010 PE=4 SV=1	24519.6	28290.1	19731.2	19046.8	19255.4	20024.6	18498.4	20646.7	22691.3	24820.8	22736.4	22923.3	25251.9	26823.9	21111.6	23541.6	25722	23753.1	25685.2	27618.2	23943.6	23542.6	24855.8	26283.2	21658.9	22861.9	19853.9	20671.2	43002.6	43357.6	28045.1	26790.4
A0A0H2ZD42	29	17	194.987	Electron transfer flavoprotein alpha-subunit OS=Pseudomonas aeruginosa (strain UCBPP-PA14) GN=etfA PE=4 SV=1	136022	143456	118283	119968	112755	96276.4	85198.1	75520.1	86044.8	90467.2	65999	63277.9	116546	103864	93917.5	88123.9	98893.6	101721	118168	114248	122681	102766	144630	131619	81981.6	85988.8	116451	104489	185859	159066	111558	92763.9
Q02EH2	31	6	202.759	Phosphoenolpyruvate carboxykinase (ATP) OS=Pseudomonas aeruginosa (strain UCBPP-PA14) GN=pckA PE=3 SV=1	18878.6	21326.2	21214.1	21533	20381.9	22183	13853.7	14383.6	16564.1	16949.5	14232.6	15132.8	13414.6	15517.6	12000.1	12375.5	16668.5	17562.8	22456.2	19703.6	13620.4	16854.1	19319.6	22779.5	14348.8	13668.4	12622.4	11803.3	16914.2	18404.7	16204.4	17007.3
A0A0H2ZJ07	3	1	14.8185	Putative fimbrial protein OS=Pseudomonas aeruginosa (strain UCBPP-PA14) GN=PA14_69760 PE=4 SV=1	370.723	252.653	396.906	442.014	728.76	689.541	526.69	436.154	806.904	880.256	601.871	638.657	499.369	492.279	605.561	561.021	563.905	603.769	337.157	364.684	856.696	997.66	217.783	278.641	671.303	669.669	516.395	454.181	279.339	245.297	920.723	676.578
A0A0H2ZI87	17	10	133.722	Putative endoribonuclease L-PSP OS=Pseudomonas aeruginosa (strain UCBPP-PA14) GN=PA14_70480 PE=4 SV=1	24894.2	22298.1	13660.5	10392.7	29017.2	26410.9	19511.9	18902.4	26074.1	24655	15503.3	15324.3	32403.1	30176.5	23638	23415	19579.9	19505.5	19289.2	18183	49363.8	47990.1	22087.4	22349.4	18595.6	19128.2	27398.8	26845.9	20906.3	18688.2	22543.8	24986.2
A0A0H2ZIQ5	5	1	20.8818	Putative poly(Hydroxyalcanoate) granule associated protein OS=Pseudomonas aeruginosa (strain UCBPP-PA14) GN=phaI PE=4 SV=1	4516.77	4928.2	4779.44	6032.07	4206.83	5824.87	3307.52	2768.79	5803.94	5447.16	2489.32	2244.5	2938.31	2311.1	3330.34	2930.59	4005.91	3403.39	3802.79	3264.16	5068.68	5716.97	4929.53	4543.81	3315.28	2853.77	3139.24	4011.48	3622.54	3020.5	4402.94	3775.54
Q02RC7	58	26	369.994	Elongation factor Ts OS=Pseudomonas aeruginosa (strain UCBPP-PA14) GN=tsf PE=3 SV=1	179418	205923	183481	193584	189809	186218	117386	121884	146090	162874	122365	121175	152178	177657	134565	134245	161797	174378	194407	181529	197685	199787	195980	216881	130114	129488	144408	142329	215090	227478	177795	172714
Q02RA9	31	13	206.488	CTP synthase OS=Pseudomonas aeruginosa (strain UCBPP-PA14) GN=pyrG PE=3 SV=1	21613.6	24391.4	21726.6	21145	26742.2	27970.1	23168.2	25860.8	20850.8	21024	18343.7	16976.8	18025.7	15054.1	18031.3	17611.5	21263.8	18546.8	18001	16643.2	19220.5	20232.3	20606.5	18724.3	18979.4	18676.4	19515	18711.3	17212.9	17570.9	22953.1	21722.6
A0A0H2ZE55	32	19	216.566	Putative ABC-type transport protein, periplasmic c OS=Pseudomonas aeruginosa (strain UCBPP-PA14) GN=PA14_14390 PE=4 SV=1	71996	76797.1	88451.4	87798.5	70265.6	73918.1	60480.9	60856.8	62103.9	66340.1	56172.8	57683.2	58228.6	62670.4	57792.9	59535.2	69944.7	72620.7	80602.3	82220.3	74437	75390.4	86286.2	92704.2	68355	63252.7	67704.8	67538.2	97706	100934	76766.5	72345.2
A0A0H2Z6B9	24	13	151.884	Probable dna-binding stress protein OS=Pseudomonas aeruginosa (strain UCBPP-PA14) GN=PA14_51830 PE=3 SV=1	55141.8	62660.9	59861.4	68800.9	59615.3	60471.3	35488.5	39072.5	77754.4	80920.4	50431.6	52357.7	62930.4	75451.3	56400.1	61706.7	58835	59117.4	68062.6	65804.5	92064.2	91847.7	58193.9	64736.4	60613.2	53881	66846.4	66076.3	72227.7	75543.3	86758.9	100233
Q02T70	8	4	49.136	50S ribosomal protein L14 OS=Pseudomonas aeruginosa (strain UCBPP-PA14) GN=rplN PE=3 SV=1	4707.45	4704.46	5661.55	5379.17	6138.94	5229.12	4492.14	4245.81	4528.83	4599.1	2843.33	2631.94	4577.85	4304.66	3888.92	3539.07	2114.61	2628.76	3384.05	3372.36	8728.39	5450.1	5769.1	5057.35	3896.68	3700.49	4043.45	4509.79	3542.79	3271.33	7177.49	5121.3
A0A0H2Z7W5	5	1	23.5025	Uncharacterized protein OS=Pseudomonas aeruginosa (strain UCBPP-PA14) GN=PA14_51060 PE=4 SV=1	2342.68	2650.15	3233.98	2816.29	4162.22	2281.9	1890	2006.06	1903.07	2212.79	2201.84	2058.87	2107.44	2147.67	1724.18	1944.8	2016.51	2159.2	2194.29	2250.01	2007.06	2646.91	2406.94	2281.27	2642.65	2111.39	2297.78	2590.06	1986.09	2818.64	2620.47	3492.21
A0A0H2ZIL4	57	15	333.915	Pyruvate dehydrogenase E1 component OS=Pseudomonas aeruginosa (strain UCBPP-PA14) GN=aceA PE=4 SV=1	54907.5	63606.3	96716.5	94544.6	61281.8	61998.6	52234.8	50286.2	54685	57285	50884.3	49425.9	53437.9	55820.5	53561.9	51295	55011.5	58110	87133.1	84365.2	45298.9	48191.2	69946	70145.5	63237.5	57258.8	69708.3	65890.5	92029.5	87531.7	60836.7	61147.5
Q02F83	16	7	102.505	30S ribosomal protein S6 OS=Pseudomonas aeruginosa (strain UCBPP-PA14) GN=rpsF PE=3 SV=1	4842.53	5262.66	5400.75	4228.19	5918.75	5829.66	7367.64	7149	5524.71	6076.53	6724.73	6596.25	6201.77	6276.44	5665.23	5755.65	5697.27	6277.34	6633.55	5565.61	4086.38	4745.19	3689.77	4905.5	5964.27	6065.6	7156.59	7505.08	6665.72	7307.86	6765.94	6927.55
A0A0H2ZBA0	3	1	15.122	Putative glyceraldehyde-3-phosphate dehydrogenase OS=Pseudomonas aeruginosa (strain UCBPP-PA14) GN=gapB PE=4 SV=1	936.147	703.961	485.297	584.604	769.679	1507.68	1169.13	809.606	481.855	753.836	785.463	897.609	1136.36	1148.77	976.016	1150.83	904.624	832.812	575.006	1052.41	453.94	665.274	1165.92	857.717	686.718	648.786	1116.79	1134.85	1337.31	1165.7	1250.41	1144.72
A0A0H2ZD57	19	7	121.466	3-oxoacyl-[acyl-carrier-protein] synthase 2 OS=Pseudomonas aeruginosa (strain UCBPP-PA14) GN=fabF1 PE=3 SV=1	15713	19420.6	14170.8	11829.9	16432	17294.5	11690.4	11524.2	16968.5	18489.1	15810	15588.7	15020.6	16711.2	11945.6	11811.6	18274.3	20302.8	20634	20243.9	14148	14776.8	21823.2	22278.5	12930.2	13753.6	14418.4	12198	15218	16815.7	16945.9	14826.5
A0A0H2ZGW6	3	1	14.8662	Putative acyl-CoA thiolase OS=Pseudomonas aeruginosa (strain UCBPP-PA14) GN=yfcY PE=3 SV=1	1831.36	1016.4	731.295	642.482	2373.07	1705.2	956.351	962.645	1938.24	1888.89	1146.4	1218.04	1074.46	1684.17	1346.94	850.557	1930.23	1345.12	1094.31	1178.91	1972.98	1712.73	766.863	1037.85	1366.45	1276.33	1141.9	1131.24	1823.59	1884.87	2083.27	2546.59
A0A0H2ZDX9	12	6	72.8581	(R)-specific enoyl-CoA hydratase OS=Pseudomonas aeruginosa (strain UCBPP-PA14) GN=phaJ1 PE=4 SV=1	11692	12676	11284.3	12755.5	11715.5	15174.6	7877.23	7685.94	8460.89	16383.8	9391.43	9021.05	11830	11196.8	10652.9	9519.68	8055.44	13267.3	15043.5	12995.5	14519.8	17633.6	15814.6	14059.9	11398.3	9334.54	12034.9	11770.7	14827.7	14892.7	16317.9	8833.43
Q02RL5	12	4	73.0422	50S ribosomal protein L19 OS=Pseudomonas aeruginosa (strain UCBPP-PA14) GN=rplS PE=3 SV=1	6524.07	5870.86	6410.62	5879.83	8511.16	6712.45	5040.51	6005.03	5756.75	5774.14	4748.53	5349.01	5483.33	6088.34	4286.86	4805.79	7943.43	7970.51	6039.56	6897.69	6752.64	6909.01	5300.9	6633.93	5038.72	4971.13	4835.29	5011.78	7417.68	7325.95	6196.86	6177.96
A0A0H2ZDT9	29	9	180.164	Putative chemotaxis signal transduction protein OS=Pseudomonas aeruginosa (strain UCBPP-PA14) GN=PA14_20750 PE=4 SV=1	21955.7	22693.9	25369.5	23039.1	25303.3	27959.9	17552	19952.5	22411.5	25982.7	17501.4	18938.5	22294	24979.9	20813.2	20200.7	24849	26595.4	28474.8	26977.9	32373.9	30287.1	26278.3	26837.1	21359	20476.3	20545.8	21948.5	27257.2	29907.5	26806	26021.1
Q02K94	12	4	67.2076	3-oxoacyl-[acyl-carrier-protein] synthase 1 OS=Pseudomonas aeruginosa (strain UCBPP-PA14) GN=fabB PE=1 SV=1	10551.2	10214.3	14292.6	10633.5	12702.9	11696.8	9318.5	9083.3	8884.95	8825.53	8270.31	8537.59	8340.51	9313.81	8504.28	8252.73	10042.4	9464.59	13223.3	10841.6	10581.6	9976.09	10590.4	10955.2	9303.16	9042.54	9593.8	9174.44	12350.7	12405.3	10712	9968.57
Q02RC6	12	5	59.7517	Uridylate kinase OS=Pseudomonas aeruginosa (strain UCBPP-PA14) GN=pyrH PE=3 SV=1	6891.8	6877.46	7441.97	10108.7	7770.63	7409.82	4886.25	4904.96	6849.95	5965.81	5398.45	5463.22	5293.43	5334.43	4904.98	5026.14	5770.15	5284.11	6984.79	5912.89	8529.77	7723.31	5870.65	6482.64	6606.46	5184.76	4954.52	5078.76	6775	7058.57	8189.86	8139.36
A0A0H2ZF77	12	3	77.6191	Outer membrane protein assembly factor BamB OS=Pseudomonas aeruginosa (strain UCBPP-PA14) GN=bamB PE=3 SV=1	2022.49	2091.7	2493.98	3039.96	2978.94	2557.32	2563.96	2606.91	2842	2924.98	2462.84	2659.94	1493.02	1665.22	1895.47	2288.77	2611.22	2481.06	2080.73	2023.12	3484.09	4339.38	2377.88	2652.57	2566.77	2552.71	1563.72	1774.21	1349.06	1684.24	3268.46	2613.29
A0A0H2ZCZ9	4	2	20.357	Putative lipoprotein OS=Pseudomonas aeruginosa (strain UCBPP-PA14) GN=PA14_26550 PE=4 SV=1	903.492	471.025	814.84	493.726	1437.09	1074.96	1395.84	1161.35	1637.57	1056.46	1435.59	1494.85	553.726	563.604	1277.95	1112.22	805.594	1288.49	887.682	1001.13	1559.34	806.053	715.112	393.603	1136.2	1752.95	913.237	765.751	449.817	443.672	794.548	957.846
A0A0H2ZC85	7	2	36.2284	Phenylalanine--tRNA ligase beta subunit OS=Pseudomonas aeruginosa (strain UCBPP-PA14) GN=pheT PE=3 SV=1	617.27	673.249	376.266	240.12	602.321	476.34	531.296	441.638	858.473	869.19	609.414	706.426	570.926	433.989	496.245	459.239	921.949	634.335	389.137	466.347	389.025	860.555	171.047	455.698	622.155	530.022	560.54	698.351	368.127	449.17	757.49	796.289
A0A0H2ZGG1	14	4	76.4093	Chemotactic transducer PctC OS=Pseudomonas aeruginosa (strain UCBPP-PA14) GN=pctC PE=4 SV=1	15171.1	11423.4	10422.5	11582.9	5946.03	7243.54	8024.82	10247.7	11099.5	9586.14	8630.99	8002.73	7233.92	7831.88	6701.94	7539.28	7081.26	7414.63	15593	11497.8	6028.09	7876.17	13097.2	15274.6	7981.74	7753.44	7655.58	8141.59	11575	12316.5	9720.37	11478.2
A0A0H2ZGI7	17	3	115.33	ATP sulfurylase GTP-binding subunit/APS kinase OS=Pseudomonas aeruginosa (strain UCBPP-PA14) GN=cysN PE=3 SV=1	5006.95	6143.3	5295.73	5926.69	5571.83	4973	4543.1	4667.13	4854.72	5137.65	4242.46	4229	6050.17	5832.31	4082.04	4155.77	4895.3	5136.28	6004.07	4826.26	7534.03	6790.94	5419.52	5049.18	4136.45	4538.04	3709.94	3755.22	4490.23	4739.53	5406.87	5502.38
A0A0H2ZC98	23	13	146.952	Putative transcriptional regulator OS=Pseudomonas aeruginosa (strain UCBPP-PA14) GN=PA14_29590 PE=4 SV=1	63449.4	82832	73649.7	64962.5	64491.9	66619.3	45643	48308.4	68654.9	76192.1	56687.1	57514	80205.9	83166.7	57052.7	59512.9	71391.7	83347.5	80423.3	78299.2	72102	80924.4	83949.2	90799	61538.2	62670.1	69386.9	68391	101649	107853	77760.4	74863
A0A0H2ZII0	2	2	9.1773	Putative biotin carboxylase subunit of a transcarboxylase OS=Pseudomonas aeruginosa (strain UCBPP-PA14) GN=accC PE=4 SV=1	3787.11	5011.26	4395.29	4253.96	4974.13	5165.7	3854.02	3602.17	3905.93	4272.07	3660.7	3280.45	3144.65	2852.5	3664.96	3150.38	4779.73	4693.07	4044.03	3994.93	4410.44	3516.39	5125.21	3996.11	4077.23	3730.94	3115.45	3653.48	5267.72	5036.19	5013.39	3877.32
A0A0H2ZK67	5	1	23.9144	ATP-dependent RNA helicase RhlE OS=Pseudomonas aeruginosa (strain UCBPP-PA14) GN=rhlE PE=3 SV=1	913.536	803.181	1990.37	2090.43	1242.11	1615.05	940.696	1468.62	1335.83	1269.16	896.026	1123.02	956.015	1445.66	841.537	982.886	975.985	983.113	1330.87	1081.89	728.125	749.683	1904.92	2252.68	1383.59	901.632	1926.77	1131.37	1050.84	931.223	1152.98	1301.34
A0A0H2ZKQ4	19	5	112.373	4-aminobutyrate aminotransferase OS=Pseudomonas aeruginosa (strain UCBPP-PA14) GN=gabT PE=3 SV=1	3612.19	3138.23	3080.54	2401.33	5550.04	4909.12	3131.03	3464.16	3122.79	3302.27	3927.19	4396.65	3524.68	3877.51	2380.8	2505.28	7179.9	5484.4	4488.73	4656.39	2530.75	2644.38	2127.4	3342.94	3942.36	3875.95	2559.8	2528.67	6128.27	7997.8	3583.43	3135.94
A0A0H2Z8F9	3	1	16.5323	Site-determining protein OS=Pseudomonas aeruginosa (strain UCBPP-PA14) GN=fleN PE=3 SV=1	824.552	1128.57	1173.82	1270.37	2004.96	2263.51	943.87	1148.06	1464.88	2213.29	1479.3	1596.43	1531.91	1503.27	1332.04	1507.94	1576.44	2121.04	1428.22	1347.49	2069.25	2167.33	906.065	821.407	1520.17	1395.49	1018.44	1195.73	2251.09	1871.16	2250.98	1880.24
Q02H54	17	8	85.8166	10 kDa chaperonin OS=Pseudomonas aeruginosa (strain UCBPP-PA14) GN=groS PE=3 SV=1	65997.4	73774	85888.9	95877.6	75978.3	74921.6	58079.4	53870	44483.8	70372.3	51392.4	51226.7	58730.3	62142.6	67131.6	65632	51085	66306.9	71699.3	67803.4	60449.4	67540.3	73132.7	85951	52478.1	54396.1	74873	64467.4	71890.5	66840.6	50491.8	38768
A0A0H2ZEB7	21	8	151.571	Uncharacterized protein OS=Pseudomonas aeruginosa (strain UCBPP-PA14) GN=PA14_19610 PE=4 SV=1	6632.15	7683.09	8058.5	8270.31	5778.65	8355.54	4748.17	4596.79	4743.85	6221.36	4895.35	5305.99	5802.44	5730.22	5548.51	5463.4	5162.63	6970.3	7440.3	7758.36	6637.85	7755.87	5374.07	7107.06	5298.45	5622.88	5949.96	5170.31	9133.46	8314.43	6698.07	5293.03
A0A0H2ZC76	9	5	46.7924	NADH dehydrogenase I chain F OS=Pseudomonas aeruginosa (strain UCBPP-PA14) GN=nuoF PE=4 SV=1	5130.58	3977.81	4131.04	4258.87	6301.15	5465.38	3759.02	4389.63	4197.2	4035.89	4751.83	4674.33	5081.53	4983.66	4596.53	4350.85	3644.39	3404.77	4504.36	4148.38	5044.07	4339.65	4452.38	4799.78	5706.78	5228.4	5370.29	5429.6	5416.95	4534.61	6152.57	4723.77
Q02F86	16	8	117.624	50S ribosomal protein L9 OS=Pseudomonas aeruginosa (strain UCBPP-PA14) GN=rplI PE=3 SV=1	56292.4	58320.2	53627.4	54452.1	84243.7	84948.8	38904.9	40898.7	66593.9	73214.8	44463.5	46681.3	64347.4	69877.4	51070	53012.9	61038.4	65867.4	53442	54756.4	90841.3	93250.3	44192	45108.2	53183.2	49823.3	70590.5	69235.7	84975.6	87698.6	82483.1	83175.3
A0A0H2ZFH3	8	3	46.9029	D-ala-D-ala-carboxypeptidase OS=Pseudomonas aeruginosa (strain UCBPP-PA14) GN=dacC PE=1 SV=1	2432.6	2485.52	3531.29	3698.49	4256.15	4750.13	2904.92	3654.44	4483.03	5094.97	4914.91	4584.01	3002.55	2912.87	3998.15	3611.88	3853.78	3252.3	2366.07	2163.1	5973.38	5236.32	1659.82	1825.43	4320.26	4913.06	3234.87	3692.49	1334.07	1800.17	6053.65	5737.72
A0A0H2ZI23	51	24	299.417	Transcription termination/antitermination protein NusA OS=Pseudomonas aeruginosa (strain UCBPP-PA14) GN=nusA PE=3 SV=1	100041	97995.2	85102.5	89759.9	83487.2	84719.9	70280.8	71921.8	82881.6	90063.4	69885.9	68387.3	87299.6	83685.4	74661.7	75039.1	99575.9	92944.7	96461.5	96064.7	97973.9	96273.9	99341	102121	76882.6	78039.9	87778	87651.6	113231	111766	83048.9	79058.2
A0A0H2ZFQ5	7	2	36.3479	Nitrogen regulatory IIA protein OS=Pseudomonas aeruginosa (strain UCBPP-PA14) GN=ptsN PE=4 SV=1	5784.22	6327.56	6308.64	6453.21	5966.27	7635.36	5369.49	6369.19	9084.32	9627.75	6675.37	6969.36	7416.63	8006.33	6923.69	7254.04	7217.99	7571.13	7312.62	6338.62	7599.59	8464.58	5081.07	6000.85	7176.45	7025.43	7454.73	7234.6	6216.75	6303.29	8846.13	10478.3
A0A0H2Z7E4	8	2	56.1925	Siderophore receptor protein OS=Pseudomonas aeruginosa (strain UCBPP-PA14) GN=pirA PE=3 SV=1	1516.44	1400.81	965.947	821.917	537.796	881.921	1440.84	1590.58	851.41	898.172	1156.95	1136.9	1297.45	1456.02	998.308	1053.38	793.209	937.685	1799.38	1449.18	410.363	500.905	598.697	931.831	568.604	1214.86	1428.03	1428.95	1156.76	1318.9	519.929	983.326
A0A0H2ZE49	3	1	14.4519	Phosphonate ABC transporter, ATP-binding protein OS=Pseudomonas aeruginosa (strain UCBPP-PA14) GN=phnL PE=4 SV=1	1210.04	1310.28	1315.93	1270.37	1045.4	1514.1	1066.43	1098.85	920.412	1434.1	853.349	1074.7	1091.27	1106.68	1108.88	1114.65	1542.74	1106.3	1870.57	1247.59	1373.93	1153.01	1281.91	1156.89	1018.24	1168.09	1229.75	1096.88	1110.87	1696.95	1054.44	981.815
A0A0H2ZD78	3	2	16.31	Uncharacterized protein OS=Pseudomonas aeruginosa (strain UCBPP-PA14) GN=PA14_25220 PE=4 SV=1	5461.13	7864.37	5120.72	5177.46	6174.57	7197.76	4373.33	4114.16	6754.36	8184.51	4642.36	4499.77	6366.41	6378.35	4919.36	5242.4	6625.6	6020.05	4226.5	4215.03	7656.01	7785.65	2493.06	3638.17	4587.2	5732.36	6073.23	5891.37	7281.7	6231.28	7918.65	8887.51
A0A0H2ZHP8	37	17	219.13	Probable c4-dicarboxylate-binding protein OS=Pseudomonas aeruginosa (strain UCBPP-PA14) GN=PA14_68260 PE=4 SV=1	18395	21786.9	14840.7	15141.1	14523.4	14775.3	17833.5	17306.9	19460.1	21623.3	18899	18349.1	22164.8	21920.4	21542.1	21964.2	18578.2	19364.1	16195.2	21247.4	15325.7	17290.8	22389.2	23478	14631	18606.1	21392	21500.3	19431.3	21464.8	14417.7	14106.5
A0A0H2ZGM0	11	3	70.5015	Putative short chain dehydrogenase OS=Pseudomonas aeruginosa (strain UCBPP-PA14) GN=PA14_57050 PE=4 SV=1	8605	8676.9	9781.86	8899.56	8524.69	8556.31	7371.91	8658.87	7444.63	7722.66	7041.71	7164.01	7466.08	8316.96	6902.38	6964.2	6153.84	7094.82	8118.5	8181.62	6012.11	6874.98	6736.76	7354.47	7528.84	7351.75	8155.68	7132.07	9174.04	10713.9	9054.41	10456.8
A0A0H2ZKC4	19	11	119.067	D-3-phosphoglycerate dehydrogenase OS=Pseudomonas aeruginosa (strain UCBPP-PA14) GN=serA PE=3 SV=1	16864	17071.3	18915.8	14517	22218.4	22416.1	18773.6	18294.9	22508	23803.8	23269.9	22780.5	20698.7	19934.5	26002.4	24183.7	25214.5	23917.6	21096.5	20458.1	26350.2	24171.5	17517.7	18667.5	21477.7	22992.4	25831.7	25614.5	19285.3	20965.3	23250.5	22542.6
A0A0H2ZF93	18	7	142.416	Transcription termination/antitermination protein NusG OS=Pseudomonas aeruginosa (strain UCBPP-PA14) GN=nusG PE=3 SV=1	12094.9	13809.5	12452.3	12578.4	18214.6	16922.3	9609.61	10117.8	11365.4	17378.8	10796.1	10930.6	15491.6	15578	13503.6	12708.7	13962.1	17482.8	14905.6	12685.9	22154.5	20789.6	13646.9	12900.5	11855.3	13791.1	17181.4	11729.5	19990.7	19799.2	18544	16972
Q02RS2	27	10	185.551	GMP synthase [glutamine-hydrolyzing] OS=Pseudomonas aeruginosa (strain UCBPP-PA14) GN=guaA PE=3 SV=1	40309.1	38936.3	34711.2	40481.1	36822.1	35190.9	23448.7	22385.9	33452.9	35037.4	26172.4	27019.2	23442.9	22820.8	27986.8	26204.4	27263.5	32224.5	30013.8	33784.8	39764.3	42703.9	27611	29910.3	31004.4	28698.8	25217.2	24424.4	29792.5	26708	36698.9	34168.2
Q02IC5	31	13	180.257	Aspartate--tRNA(Asp/Asn) ligase OS=Pseudomonas aeruginosa (strain UCBPP-PA14) GN=aspS PE=3 SV=1	26196.4	25640.4	29266.8	27846.5	30609.1	30690.1	23959.2	23277.5	28463	31706.5	28455.7	25561.9	24949.1	25010.7	26702.4	27049.8	24486.4	24422	34950.7	31951.2	37774.7	36918.5	38208.8	37442.6	26921.1	26412	30904.4	27320.7	33416.2	32495.2	33025	31368.6
A0A0H2Z9J3	5	2	26.0456	Putative Enoyl-CoA hydratase OS=Pseudomonas aeruginosa (strain UCBPP-PA14) GN=PA14_40980 PE=3 SV=1	1941.61	2353.84	1733.77	2380.61	2007.83	2007.62	1680.37	1683.31	1751.92	2382.49	1542.99	1787.37	1968.6	2045.33	1412.85	1860.91	1025.75	1650.49	1470.57	1849.48	1340.37	1776.63	1628.11	2192.23	1680.85	1459.09	1549.86	1798.51	2071.92	2185.83	2125.08	1703.58
Q02IB8	20	7	129.471	Proline--tRNA ligase OS=Pseudomonas aeruginosa (strain UCBPP-PA14) GN=proS PE=3 SV=1	12388.6	12045.2	13725.9	12259.3	10778.9	9643.08	9656.79	8917.94	9460.06	10368.2	8988.22	9455.8	8503.18	8546.4	8996.23	9051	7646.18	8998.06	11778.6	12384.5	12696.2	12257.4	12255.7	11501.8	9307.01	8789.78	8251.22	8989	11129.4	10641.9	10954.2	10114
A0A0H2ZJY3	5	2	32.1797	Putative tRNA and rRNA cytosine-C5-methylases OS=Pseudomonas aeruginosa (strain UCBPP-PA14) GN=sun PE=3 SV=1	3278.67	2751.89	2807.04	3014.29	2312.04	2662.94	2660.42	2631.38	3070	2759.96	2506.03	2883.19	2993.33	2776.59	2721.46	2740.13	3084.37	2929.74	2427.71	3321.48	3673.25	4231.15	3055.68	3441.4	3345.05	2770.77	3055.17	2964	3569.01	4015.63	3707	3542.3
A0A0H2Z7B2	22	11	137.11	Serine protease MucD OS=Pseudomonas aeruginosa (strain UCBPP-PA14) GN=mucD PE=4 SV=1	17819.9	18788.7	16983.3	19930.5	19735.8	19264.5	14244.3	14293.1	14899.4	16699.2	13603.5	14024.2	14559	15438.3	14108.3	14002	14296.7	15045	15609.5	17683.4	15971.5	18149.7	17795.4	18245.2	16820.9	15514.2	16402.1	16877.1	17954	18808.7	19697.4	19968.8
A0A0H2ZCK2	37	16	246.995	Putative outer membrane porin, OprD family OS=Pseudomonas aeruginosa (strain UCBPP-PA14) GN=oprQ PE=4 SV=1	47203.6	55564.3	50520.8	55368.2	64165.8	62651.8	43713.7	44817	69084.1	80147.1	43856.8	43498.4	65547.2	53258	56564.8	54099.7	59434.8	66762.4	50846	48180	99230.3	90344.3	47432.7	48404.8	52774.1	53337.2	59406.4	56975.4	70783.5	65856.1	74276.7	62672.1
A0A0H2ZDL5	29	12	203.582	Peptidyl-prolyl cis-trans isomerase OS=Pseudomonas aeruginosa (strain UCBPP-PA14) GN=PA14_21820 PE=3 SV=1	23645.5	22321.3	35680.6	28361.2	52808.8	56946	27205.5	27046.1	38362.8	41927.9	35291.7	34025.9	21328.1	21677.6	26780.8	27046.3	31849.9	28107.4	29999.9	28281.1	55178	51695.7	34665.5	36504.2	37945.2	33245.6	23919.9	21784.2	20837.2	20469.6	45510.6	44381.6
A0A0H2Z9D1	13	6	75.6368	Transcriptional regulator CysB OS=Pseudomonas aeruginosa (strain UCBPP-PA14) GN=cysB PE=4 SV=1	10067.8	11750.4	11241.3	11033	10635.4	10616	9616.03	10454.7	10726.1	10152.8	9759.71	9539.83	8856.77	9801.51	9153.74	9504.81	11522.8	12911.1	9203.21	9041.14	15346	14728.1	10682.9	8629.72	10111.7	10477.8	8085.07	8043.06	7580.81	8665.83	11748.3	12448.9
A0A0H2ZHR6	11	3	57.6525	RNA polymerase-binding transcription factor DksA OS=Pseudomonas aeruginosa (strain UCBPP-PA14) GN=dksA PE=3 SV=1	7529.54	8029.22	6700.91	6760.2	7535.46	7756.62	4832.02	4880.46	6238.23	6606.03	5757.21	6162.45	7700.44	9803.53	5252.62	5346.1	7312.16	7640.23	7420.93	6501.58	7551.19	8673.73	7721.27	8161.64	5454.83	5511.82	5753.85	5590.44	6051.87	7437.14	7905	7573.49
Q02DF5	5	3	28.1945	ATP synthase epsilon chain OS=Pseudomonas aeruginosa (strain UCBPP-PA14) GN=atpC PE=3 SV=1	13704.1	14344.4	14724.4	16359.8	21101.8	16733.2	11564.3	11814.8	12744.8	17070.5	10210.1	10104.5	12179.5	13772.4	13774.6	12367.8	16515.8	15888.9	12282.7	10272.4	19644.9	16503.3	12808.3	17310	11654.5	12484.8	14025.7	14860.9	12736.2	15104.9	17032.7	12159.2
A0A0H2ZLB3	29	11	160.938	Chaperone SurA OS=Pseudomonas aeruginosa (strain UCBPP-PA14) GN=surA PE=3 SV=1	38773.8	48160.2	44769.3	47417.2	38303.9	38076.6	27936.3	30779.4	43666.1	43870.6	29284.2	28086.1	38312.7	41065.3	33326.3	33640.3	41791	42564.6	41642.1	39451.4	49068.2	50894.8	35933.8	42059.8	28091.4	31448.7	39096	36282.1	42655.3	44625	41641.6	44904.5
A0A0H2ZA23	23	8	144.732	Putative alcohol dehydrogenase, zinc-containing OS=Pseudomonas aeruginosa (strain UCBPP-PA14) GN=yhfP PE=4 SV=1	37513.1	37916.6	47737.4	50440.4	43968	44777.8	32649.5	31839.9	47557.1	52775.1	35033.2	35382.9	39366.4	41575.4	39631	39818.7	40067.7	39410	41652.9	43718.7	47690.2	49186.2	37445.5	41174.7	46024.5	43959.8	50007	44279.6	48134.3	45831.3	53628.5	52865
A0A0H2ZJ98	17	10	119.162	Aspartate ammonia-lyase OS=Pseudomonas aeruginosa (strain UCBPP-PA14) GN=aspA PE=3 SV=1	30108.5	27154.3	34924.5	37921.5	42065.1	41700.7	26523.2	25391	35505.6	33256.6	25155.8	26499.1	26769.3	28090.8	25414.2	25529.5	29140.7	26247.9	28067.1	25682.8	37044.5	40863.3	30302.4	29934.8	27256.8	28343.1	26553.4	26242	26395.3	29158.1	37623.7	39740.1
A0A0H2ZJ90	18	7	102.299	Putative uroporphyrin-III C-methyltransferase OS=Pseudomonas aeruginosa (strain UCBPP-PA14) GN=hemX PE=4 SV=1	12931.1	12686.2	18747.8	14267.6	13223.2	14427.6	11989	11929.4	12318	13680.8	14703.9	12024.9	10822.6	9131.49	11601.6	13221	10802.7	12277.6	13131.4	10753.2	17954.3	19052.6	16599.5	13797.4	13093.9	15466.7	15723.3	13221.7	13705.2	11805.2	13060	12514.5
A0A0H2ZDV1	20	13	123.177	Site-determining protein OS=Pseudomonas aeruginosa (strain UCBPP-PA14) GN=minD PE=3 SV=1	53760.2	61680.1	50399.3	45489.6	49987.8	45433	36405.4	34910.3	44984.2	44666.7	50881.7	46569.8	46688.4	48231.7	39626.7	36160.8	49680.9	51779.2	57067.5	48128.4	44252.8	40090	50670.9	50286.9	40062.7	39178.9	41908.5	37344.6	52921.9	52996.3	37391.4	36593
Q02ND1	6	3	39.6239	NADH-quinone oxidoreductase subunit C/D OS=Pseudomonas aeruginosa (strain UCBPP-PA14) GN=nuoC PE=3 SV=1	5198.9	4935.33	1227.36	1912.61	6120.27	5569.32	3545.73	3458.75	4925.73	6434.85	4258.09	5141.64	3076.23	3578.17	4657.15	4891.86	1221.63	4075.99	2182.64	1683.96	6737.87	8907.25	3861.18	4381.86	5075.65	4858.12	2984.79	2108.82	2851.19	3174.07	7925.11	5985.9
A0A0H2ZAL1	18	6	93.0595	Putative methyl-accepting chemotaxis transducer OS=Pseudomonas aeruginosa (strain UCBPP-PA14) GN=ctpH PE=4 SV=1	3919.12	4366.4	3159.11	3107.71	4904.87	3972.84	3668.8	3962.05	4192.79	4434.25	4149.51	4076.32	4393.68	4404.31	4909.22	4064.62	5365.55	5155.79	3591.06	3551.87	5686.82	4851.23	3520.05	3882.28	3052.38	4649.03	5120.36	4295.21	3060.89	3274.4	5830.89	5348.98
A0A0H2ZCL3	7	1	40.2969	Putative methyl-accepting chemotaxis protein OS=Pseudomonas aeruginosa (strain UCBPP-PA14) GN=PA14_27000 PE=4 SV=1	396.033	473.253	840.51	913.559	1827.12	1644.53	1166.25	1173.71	974.762	799.137	1123.43	1319.51	999.646	1200.23	775.13	681.676	826.263	1043.4	719.696	810.76	1809.57	2048.39	742.631	1018.88	1384.04	1021.26	760.335	779.722	1370.9	1332.12	1033.33	1165.73
A0A0H2ZGN3	14	4	83.5974	Chemotactic transducer PctB OS=Pseudomonas aeruginosa (strain UCBPP-PA14) GN=pctB PE=4 SV=1	5600.2	5910.02	5460.15	7760.33	6854.6	3774.12	5727.26	4605.95	4384.67	7901.46	6537.58	6718.72	2771.41	2754.29	5454.13	5591.82	1937.67	4294.83	5239.08	5197.75	6367.46	5928.63	8160.87	11042.9	6447.62	8122.91	3848.63	2991.77	5853.5	5029.49	7977.16	5037.88
A0A0H2ZCU5	16	6	100.572	Putative electron transfer flavoprotein-ubiquinone oxidoreductase OS=Pseudomonas aeruginosa (strain UCBPP-PA14) GN=PA14_25840 PE=4 SV=1	21499.8	20250.5	22193.1	25503.4	21161.9	18202.5	16356.6	15511.5	10698.6	23373.2	16376.7	17658.3	19089.9	20077	17708.3	18722.1	9836.93	19851.7	20133.8	18730.4	19027.9	18550.5	17946	25400.9	16531.6	17028.4	20240.5	16487.2	23204.3	22006.8	19416.1	13046.8
Q02EW6	10	5	50.3802	Arginine--tRNA ligase OS=Pseudomonas aeruginosa (strain UCBPP-PA14) GN=argS PE=3 SV=1	7203.41	9476.95	5192.42	4710.25	7146.27	7449.1	5645.88	8032.76	8179.17	9595.23	6331.89	7101.31	5583.14	7208.28	6541.36	6492.68	5840.8	7258.6	7028.78	6371.13	6513.73	9439.08	4190.47	4993.85	6476.95	6753.18	6104.39	5588.73	7074.25	7701.86	8758.15	8145.22
A0A0H2Z9A2	68	21	430.2	Elongation factor G OS=Pseudomonas aeruginosa (strain UCBPP-PA14) GN=fusA2 PE=3 SV=1	18487.4	19260.6	16933.4	15172.5	17271.3	18856.6	19417.9	18733.8	16129.7	17511.7	16177.2	16697.5	16875.1	16035.5	15762.2	15987	14675.9	15874.9	17692	21308.9	17401.7	17190.2	17098.6	16731.4	14554	17122.8	17717.7	17604.4	19845.6	21326.6	18482.2	15341.3
A0A0H2ZI65	27	14	161.067	Azurin OS=Pseudomonas aeruginosa (strain UCBPP-PA14) GN=azu PE=4 SV=1	46376	50017.7	50329.4	51718.4	44657.8	35741.5	39499.1	42841.2	38693.8	49733.8	37422.7	39343.4	47901.9	57778.4	46538.2	47968.4	41746.8	44967.1	56302.3	47967.5	51652.6	49395.1	46968.7	57658.2	39526.6	39907.1	48580.2	44093.9	55374.3	64518.9	43220.8	45049.8
Q02UU0	36	21	248.588	Alkyl hydroperoxide reductase subunit C OS=Pseudomonas aeruginosa (strain UCBPP-PA14) GN=ahpC PE=1 SV=1	313167	354215	200058	209995	409229	438269	207655	216091	299885	354952	210191	212181	293368	302045	259761	265724	273204	306065	227176	222068	464204	469473	208817	231921	232749	230892	281439	280743	307426	321881	352826	344504
A0A0H2Z976	10	2	57.0465	Uncharacterized protein OS=Pseudomonas aeruginosa (strain UCBPP-PA14) GN=PA14_44080 PE=4 SV=1	4596.49	6163	4743.03	6336.54	3841.76	4585.25	3525.15	3940.11	6464.73	5126.44	3584.11	3599.62	3645.33	4155.34	3834.72	4197.24	3788.09	5251.03	4971.37	4138.14	4665.05	5355.79	4160.27	4690.02	3880.04	3534.25	3665.75	3641.13	4599.01	5728.69	4719.13	6237.69
Q02T81	20	5	141.358	30S ribosomal protein S10 OS=Pseudomonas aeruginosa (strain UCBPP-PA14) GN=rpsJ PE=3 SV=1	30735.5	24457.8	29694.2	26649.1	47828.7	40801.7	19766.9	19307.4	33545.4	39420.4	25227.8	24778.1	31375.7	34135.2	25911.7	27741.2	34401.9	33142.4	27042.1	23869.4	47673.8	49147.4	19143	24654.8	27297.5	26916.8	33611	30752	26085.4	29043.9	42095.3	43955.2
A0A0H2Z855	33	11	195.034	Ribonucleoside-diphosphate reductase OS=Pseudomonas aeruginosa (strain UCBPP-PA14) GN=nrdA PE=3 SV=1	24960.3	22209.8	31411.4	33646.6	24412.6	25796.7	22373.4	21022.4	25540.4	27852.8	24768.7	24533.5	20196.8	20166.9	24296.5	23957.4	22244.8	21168.7	21435.3	19338.4	36424	30149	29431.1	22335.4	26529.3	25692.8	22581.8	20327	22404.3	22264.9	33687.6	30558
Q02RB1	8	4	48.3143	Acetyl-coenzyme A carboxylase carboxyl transferase subunit alpha OS=Pseudomonas aeruginosa (strain UCBPP-PA14) GN=accA PE=3 SV=1	2961.35	4548.06	2288.13	2873.79	4575.81	6361.66	3019.54	3904.63	4452.73	4141.13	3834.49	3116.98	3614.15	4032.04	3597.7	3816.55	3823.85	3370.2	3745.56	4050.43	4595.53	5403.41	3438.52	3889.19	3526.87	3576.28	3429.82	4584.1	3937.97	3985.05	4817.44	4603.56

## Sheet: Changed proteins
	In black: proteins with a significant ANOVA (Pvalue <0.05) and fold change superior to 2
	In blue: proteins with a significant ANOVA (Pvalue<0.05) but a fold change inferior to 2
	In red: proteins with a non significant ANOVA (pvalue > 0.05)
	Infinity: fold change was not calculated as the protein was not detected in all samples of one of the two conditions
					SsoPox 5A8 (Inactive)												GcL								SsoPox W263I
					Vs SsoPox W263I				Vs GcL				Vs SsoPox W263+GcL				Vs SsoPox W263I				Vs SsoPox W263+GcL				Vs SsoPox W263+GcL				Information from Pseudomonas Genome Database (http://www.pseudomonas.com/)
ID uniprot	Protein ID in PA14	Gene ID in PAO1	Name in PA14	Name in PAO1	Anova	Fold change	log fold change	Higher in	Anova	Fold change	log fold change	Higher in	Anova	Fold change	log fold change	Higher in	Anova	Fold change	log fold change	Higher in	Anova	Fold change	log fold change	Higher in	Anova	Fold change	log fold change	Higher in	Localization	Operon	Function 1	Function 2	Function 3	Function 4
A0A0H2ZE61	PA14_20960	PA3332			1.20505e-09	Infinity		5A8	2.41681e-07	262.647	-2.41937	5A8	1.20505e-09	Infinity		5A8	0.334282	Infinity		GcL	0.334282	Infinity		GcL	1	1		---	Cytoplasmic	PA14_20940/PA14_21020	Putative enzymes
A0A0H2ZK55	PA14_01490	PA0122		RahU	1.51634e-12	959.043	-2.98184	5A8	1.28939e-10	9.00475	-0.954471	5A8	8.32701e-09	1611.67	-3.20728	5A8	2.47722e-10	106.504	-2.02737	GcL	4.15616e-07	178.98	-2.2528	GcL	0.158953	1.68049	0	SsoPox	Extracellular		Adaptation/Protection
A0A0H2ZEZ6	PA14_14740	PA3813	IscU	IscU	6.16438e-07	162.936	-2.21202	5A8	0.000170849	26.2745	-1.41953	5A8	1.7152e-07	231.8	-2.36511	5A8	0.388081	6.20132	0	GcL	0.223857	8.82226	0	GcL	0.643369	1.42264	0	SsoPox	Cytoplasmic	PA14_14710/PA14_14810	Biosynthesis of cofactors, prosthetic groups and carriers
A0A0H2ZG51	PA14_09490	PA4209	PhzM	PhzM	0.00326706	77.2689	-1.888	5A8	0.482264	4.7231	0	5A8	0.00232976	83.7665	-1.92307	5A8	0.000136389	16.3598	-1.21378	GcL	9.70838e-05	17.7355	-1.24884	GcL	0.786832	1.08409	0	SsoPox	Cytoplasmic		Putative enzymes
Q02L47;A0A0H2ZGA6	PA14_09470/PA14_39960	PA4211/PA1900	PhzB1/B2	PhzB1/B2	9.94914e-10	63.4356	-1.80233	5A8	4.09436e-08	27.39	-1.43759	5A8	8.34873e-10	65.8865	-1.8188	5A8	4.42191e-06	2.31601	-0.364741	GcL	1.99476e-06	2.40549	-0.381204	GcL	0.460295	1.03864	0	SsoPox	Cytoplasmic	PA14_09410/PA14_09460 or PA14_39880/PA14_39960	Secreted Factors (toxins, enzymes, alginate)
A0A0H2Z7X3	PA14_48770	PA1201			1.27535e-11	43.5504	-1.63899	5A8	2.83144e-11	17.3677	-1.23974	5A8	1.60541e-08	29.477	-1.46948	5A8	3.62395e-05	2.50756	-0.399251	GcL	0.0286869	1.69724	0	GcL	0.410771	1.47744	0	Mix	Cytoplasmic		Transcriptional regulators
A0A0H2ZEG1	PA14_18820	PA3518			1.11022e-15	34.0008	-1.53149	5A8	4.66294e-15	31.3537	-1.49629	5A8	3.8769e-13	28.6736	-1.45748	5A8	0.332435	1.08443	0	GcL	0.621605	1.09347	0	Mix	0.256475	1.18579	0	Mix	Cytoplasmic	PA14_18810/PA14_18860	Hypothetical, unclassified, unknown
A0A0H2ZEK9	PA14_18830	PA3517			4.41598e-07	32.0249	-1.50549	5A8	0.00138932	8.84252	-0.946576	5A8	3.31448e-08	17.027	-1.23114	5A8	0.46563	3.6217	0	GcL	0.760945	1.92558	0	GcL	0.0667039	1.88083	0	Mix	Cytoplasmic	PA14_18810/PA14_18860	Carbon compound catabolism
A0A0H2ZIN4	PA14_68170	PA5161	RmlB	RmlB	3.09839e-05	25.9095	-1.41346	5A8	0.246155	1.65784	0	GcL	0.00131116	6.23569	-0.794885	5A8	0.0645899	42.9536	0	GcL	0.245729	10.3377	0	GcL	0.330847	4.15503	0	Mix	Cytoplasmic	PA14_68170/PA14_68210	Cell wall / LPS / capsule
A0A0H2ZE82	PA14_18850	PA3516			1.0123e-11	23.5466	-1.37193	5A8	8.88178e-16	37.3246	-1.57199	5A8	6.32605e-12	23.9958	-1.38014	5A8	0.0207632	1.58514	0	Ssopox	0.0245866	1.55546	0	Mix	0.90504	1.01908	0	SsoPox	Cytoplasmic	PA14_18810/PA14_18860	Carbon compound catabolism	Putative enzymes
A0A0H2ZJ40	PA14_70360	PA5330			2.8281e-06	15.6459	-1.1944	5A8	0.32517	1.06272	0	5A8	0.000462557	6.03169	-0.780439	5A8	0.00821792	14.7225	-1.16798	GcL	0.0411742	5.67572	-0.754021	GcL	0.564071	2.59394	0	Mix	Unknown	PA14_70360/PA14_70370	Hypothetical, unclassified, unknown
A0A0H2ZF69;A0A0H2ZKU3	PA14_09450/PA14_39925	PA4213/PA1902	PhzD1/PhzD2	PhzD1/PhzD2	2.6013e-11	14.4131	-1.15876	5A8	2.00301e-09	7.01477	-0.846014	5A8	2.20052e-10	13.5489	-1.1319	5A8	4.68523e-05	2.05468	-0.312744	GcL	0.000416606	1.93148	0	GcL	0.822066	1.06378	0	Mix	Cytoplasmic	PA14_09410/PA14_09460 or PA14_39880/PA14_39960	Secreted Factors (toxins, enzymes, alginate)
Q02KH4	PA14_42730	PA1684	MtnD	MtnD	3.76376e-11	14.2571	-1.15403	5A8	0.00542519	3.38089	-0.529031	5A8	7.26719e-09	15.4645	-1.18934	5A8	0.0760782	4.21696	0	GcL	0.0502052	4.57409	0	GcL	0.379271	1.08469	0	SsoPox	Cytoplasmic	PA14_42710/PA14_42760	Amino acid biosynthesis and metabolism	Central intermediary metabolism
A0A0H2ZHR0	PA14_61190	PA4624		CdrB	3.04798e-11	12.6201	-1.10106	5A8	2.2218e-06	5.864	-0.768194	5A8	3.04257e-10	10.1501	-1.00647	5A8	0.0104514	2.15214	-0.332871	GcL	0.0727897	1.73092	0	GcL	0.0574205	1.24335	0	Mix	Outer Membrane	PA14_61190/PA14_61200	Cell wall / LPS / capsule	Protein secretion/export apparatus
A0A0H2ZED1	PA14_18070				3.44592e-08	11.7883	-1.07145	5A8	2.9383e-08	11.7457	-1.06988	5A8	4.40274e-07	11.8828	-1.07492	5A8	0.925166	1.00363	0	GcL	0.628641	1.01167	0	GcL	0.674014	1.00801	0	SsoPox	Unknown		Transport of small molecules
A0A0H2ZBE0	PA14_34030	PA2367	Hcp3	Hcp3	0.00142428	10.4791	-1.02033	5A8	0.621882	1.10131	0	GcL	8.8567e-05	8.22734	-0.915259	5A8	0.000505491	11.5408	-1.06224	GcL	1.8366e-06	9.06087	-0.95717	GcL	0.233305	1.2737	0	Mix	Extracellular	PA14_33940/PA14_34070	Hypothetical, unclassified, unknown
A0A0H2Z7Y2	PA14_48590	PA1216			1.12754e-12	10.0234	-1.00101	5A8	4.04077e-12	9.12615	-0.960287	5A8	2.83873e-12	9.72542	-0.987908	5A8	0.200594	1.09831	0	GcL	0.410305	1.06567	0	GcL	0.700087	1.03064	0	Mix	Cytoplasmic	PA14_48530/PA14_48590	Hypothetical, unclassified, unknown
A0A0H2ZGA2	PA14_09530	PA4206	MexH	MexH	7.08695e-11	9.87876	-0.994702	5A8	6.99434e-08	5.44427	-0.73594	5A8	1.54575e-10	9.07804	-0.957992	5A8	0.000360915	1.81452	0	GcL	0.00164645	1.66745	0	GcL	0.235994	1.0882	0	Mix	Cytoplasmic Membrane	PA14_09500/PA14_09540	Transport of small molecules
A0A0H2Z9Z1;A0A0H2ZG56	PA14_09440/PA14_39910	PA4214/PA1903	PhzE1/PhzE2	PhzE1/PhzE2	6.57252e-13	9.53608	-0.97937	5A8	1.08918e-09	5.17283	-0.713728	5A8	8.7652e-10	7.56042	-0.878546	5A8	1.83062e-05	1.84349	0	GcL	0.0131735	1.46156	0	GcL	0.162022	1.26132	0	Mix	Cytoplasmic	PA14_09410/PA14_09460 or PA14_39880/PA14_39960	Secreted Factors (toxins, enzymes, alginate)
A0A0H2ZFK0	PA14_13170	PA3920		CueA / CopA1/ YvgX	1.04715e-10	8.05528	-0.906081	5A8	2.72185e-10	7.30585	-0.863671	5A8	6.53649e-11	8.559	-0.932423	5A8	0.0972045	1.10258	0	GcL	0.00969966	1.17153	0	GcL	0.198833	1.06253	0	SsoPox	Cytoplasmic Membrane		Transport of small molecules
A0A0H2Z5X2	PA14_54430	PA0762	AlgU	AlgU	0.0032247	7.80099	-0.89215	5A8	0.063051	2.82927	0	5A8	0.0084258	6.27907	-0.797895	5A8	0.534192	2.75724	0	GcL	0.415386	2.21932	0	GcL	0.0965459	1.24238	0	Mix	Cytoplasmic	PA14_54390/PA14_54430	Transcriptional regulators
A0A0H2ZGT7	PA14_62680	PA4738		Yjbj	4.27868e-08	7.68647	-0.885727	5A8	6.36666e-05	2.53694	-0.404311	5A8	3.62791e-07	6.82863	-0.834334	5A8	3.49562e-06	3.02982	-0.481416	GcL	5.68446e-05	2.69168	-0.430023	GcL	0.709751	1.12562	0	Mix	Unknown	PA14_62680/PA14_62690	Hypothetical, unclassified, unknown
Q02T79	PA14_08860	PA4262	RplD	RplD	7.68864e-09	7.61984	-0.881946	5A8	0.176135	1.22986	0	5A8	0.000121757	4.23143	-0.626487	5A8	8.8274e-05	6.1957	-0.792091	GcL	0.00443726	3.44058	-0.536632	GcL	0.667732	1.80077	0	Mix	Cytoplasmic	PA14_08850/PA14_08880	Translation, post-translational modification, degradation	Transcription, RNA processing and degradation
A0A0H2Z705	PA14_54340	PA0769			4.0467e-05	6.68167	-0.824885	5A8	0.0901478	1.65798	0	5A8	0.0025659	3.44495	-0.537183	5A8	0.218421	4.03001	0	GcL	0.7037	2.0778	0	GcL	0.149447	1.93956	0	Mix	Unknown	PA14_54290/PA14_54340	Hypothetical, unclassified, unknown
A0A0H2ZF64	PA14_09500	PA4208	OpmD	OpmD	2.78119e-10	5.68843	-0.754992	5A8	2.25574e-10	4.81924	-0.682979	5A8	2.41355e-09	4.66384	-0.668744	5A8	0.0199968	1.18036	0	GcL	0.799228	1.03332	0	Mix	0.0490301	1.21969	0	Mix	Outer Membrane	PA14_09500/PA14_09540	Transport of small molecules	Membrane proteins
A0A0H2ZBP7	PA14_26280	PA2920			1.7817e-09	5.44466	-0.735971	5A8	4.83165e-10	6.44467	-0.809201	5A8	2.05758e-08	4.17222	-0.620367	5A8	0.142192	1.18367	0	Ssopox	0.00154202	1.54466	0	Mix	0.0315689	1.30498	0	Mix	Cytoplasmic Membrane		Chemotaxis
A0A0H2ZEI2	PA14_18810	PA3519			1.79567e-12	5.13686	-0.710698	5A8	3.55823e-05	2.78107	-0.444212	5A8	3.3625e-11	4.98231	-0.697431	5A8	0.0147037	1.84708	0	GcL	0.0224717	1.79151	0	GcL	0.748774	1.03102	0	Mix	Cytoplasmic	PA14_18810/PA14_18860	Hypothetical, unclassified, unknown
A0A0H2Z7U1	PA14_51390	PA0999	PqsD	PqsD	4.44625e-09	5.05432	-0.703663	5A8	0.0756761	1.39727	0	GcL	1.47009e-07	4.33855	-0.637344	5A8	1.62037e-09	7.06226	-0.848944	GcL	3.19488e-08	6.06213	-0.782625	GcL	0.314609	1.16498	0	Mix	Cytoplasmic	PA14_51380/PA14_51430	Hypothetical, unclassified, unknown
Q02K16	PA14_44620	PA1533			1.36707e-05	4.97811	-0.697064	5A8	0.0357755	2.02424	-0.306262	5A8	6.65958e-05	3.48567	-0.542287	5A8	0.548411	2.45925	0	GcL	0.856841	1.72197	0	GcL	0.0401277	1.42816	0	Mix	Unknown	PA14_44610/PA14_44630	Hypothetical, unclassified, unknown
A0A0H2ZK85	PA14_01840	PA0149			0.000908539	4.55079	-0.658087	5A8	0.0367043	2.03965	-0.309555	5A8	0.016187	3.59568	-0.555781	5A8	0.0294348	2.23117	-0.348532	GcL	0.0844606	1.76289	0	GcL	0.595465	1.26563	0	Mix	Cytoplasmic	PA14_01840/PA14_01860	Transcriptional regulators
Q02TY9	PA14_05510	PA0423		PasP	2.92821e-10	4.53472	-0.656551	5A8	1.62714e-08	3.1942	-0.504361	5A8	5.79828e-08	3.74983	-0.574012	5A8	2.20979e-05	1.41968	0	GcL	0.0910928	1.17395	0	GcL	0.117232	1.20931	0	Mix	Unknown	PA14_05500/PA14_05510	Secreted Factors (toxins, enzymes, alginate)	Membrane proteins
A0A0H2ZD84	PA14_18860	PA3515			3.62757e-07	4.52538	-0.655655	5A8	1.34906e-06	3.91236	-0.592439	5A8	1.33361e-06	3.97056	-0.598851	5A8	0.00653074	1.15669	0	GcL	0.755808	1.01488	0	GcL	0.0272869	1.13973	0	Mix	Cytoplasmic	PA14_18810/PA14_18860	Hypothetical, unclassified, unknown
A0A0H2ZGI5	PA14_09420/PA14_39890	PA4215/PA1904	PhzF1/PhzF2	PhzF1/PhzF2	0.00160344	4.40829	-0.64427	5A8	0.000615847	5.28177	-0.72278	5A8	0.000613787	5.39608	-0.732079	5A8	0.313222	1.19815	0	Ssopox	0.991207	1.02164	0	GcL	0.309314	1.22408	0	SsoPox	Cytoplasmic	PA14_09410/PA14_09460 or PA14_39880/PA14_39960	Secreted Factors (toxins, enzymes, alginate)
A0A0H2ZAZ1	PA14_34870	PA2300	ChiC	ChiC	7.75039e-08	4.16273	-0.619379	5A8	1.87992e-10	9.78112	-0.990389	5A8	4.27835e-07	4.09283	-0.612023	5A8	8.45129e-06	2.34969	0.37101	Ssopox	5.05049e-05	2.38982	0.378365	Mix	0.995161	1.01708	0	Mix	Extracellular		Carbon compound catabolism
A0A0H2ZE75	PA14_20740	PA3350	FlgA	FlgA	6.58848e-06	4.12734	-0.61567	5A8	0.429574	1.02652	0	GcL	0.00165452	2.52633	-0.402489	5A8	0.0219943	4.23678	-0.627036	GcL	0.101463	2.59332	0	GcL	0.455916	1.63373	0	Mix	Cytoplasmic		Motility & Attachment
A0A0H2Z7G1	PA14_50880	PA1041			0.00144106	3.69428	-0.567529	5A8	0.849385	1.09331	0	5A8	0.000519482	4.03935	-0.606311	5A8	0.000281821	3.379	-0.528788	GcL	3.36864e-05	3.69462	-0.56757	GcL	0.821982	1.09341	0	SsoPox	Outer Membrane		Membrane proteins
A0A0H2ZKJ8	PA14_05550	PA0427	OprM	OprM	2.97969e-06	3.6924	-0.567309	5A8	0.156085	1.32849	0	5A8	0.000550187	2.62611	-0.419314	5A8	0.022462	2.7794	-0.443952	GcL	0.11064	1.97677	0	GcL	0.438923	1.40603	0	Mix	Outer Membrane	PA14_05530/PA14_05550	Antibiotic resistance and susceptibility	Transport of small molecules
Q02T66	PA14_08990	PA4249	RpsH	RpsH	1.98672e-06	3.52487	-0.547143	5A8	0.741518	1.08111	0	GcL	0.00112877	2.43489	-0.386479	5A8	0.002099	3.81076	-0.581012	GcL	0.0249367	2.63237	-0.420348	GcL	0.253625	1.44765	0	Mix	Cytoplasmic	PA14_08990/PA14_09070	Translation, post-translational modification, degradation
A0A0H2Z8W6	PA14_40030	PA1894			2.47675e-09	3.50064	-0.544148	5A8	0.0439293	1.55735	0	5A8	2.49242e-06	2.64316	-0.422124	5A8	0.0247947	2.24783	-0.351763	GcL	0.172875	1.69722	0	GcL	0.0197086	1.32442	0	Mix	Unknown	PA14_39990/PA14_40060	Putative enzymes
A0A0H2Z792	PA14_47550	PA1287			1.64559e-09	3.40885	-0.532608	5A8	5.99053e-07	2.23956	-0.350162	5A8	1.04005e-06	2.40255	-0.380673	5A8	2.93659e-05	1.52211	0	GcL	0.392118	1.07278	0	GcL	0.00173151	1.41884	0	Mix	Periplasmic		Adaptation/Protection
A0A0H2ZCK1	PA14_21880	PA3257	Tsp	AlgO	0.0147187	3.30469	-0.519131	5A8	7.04465e-08	114.961	-2.06055	5A8	0.0549921	2.41978	0	5A8	2.37829e-06	34.7873	1.54142	Ssopox	2.59842e-07	47.509	1.67678	Mix	0.331606	1.3657	0	Mix	Cytoplasmic Membrane	PA14_21870/PA14_21880	Translation, post-translational modification, degradation
A0A0H2ZBX7	PA14_24900	PA3029	MoaB2	MoaB2	2.64045e-07	3.215	-0.507181	5A8	0.084076	1.34428	0	5A8	0.000103826	2.42833	-0.385308	5A8	0.000107993	2.39162	-0.378692	GcL	0.00851992	1.80642	0	GcL	0.158102	1.32395	0	Mix	Cytoplasmic	PA14_24900/PA14_24910	Biosynthesis of cofactors, prosthetic groups and carriers
A0A0H2ZI80	PA14_65280	PA4942	HflK	HflK	1.17574e-08	3.15846	-0.499475	5A8	0.00143004	1.69691	0	5A8	6.10752e-08	2.8266	-0.451264	5A8	0.00130416	1.8613	0	GcL	0.00628096	1.66573	0	GcL	0.310802	1.11741	0	Mix	Unknown	PA14_65270/PA14_65280	Cell division	Translation, post-translational modification, degradation
A0A0H2ZIK7	PA14_67810	PA5134	CtpA	CtpA	8.31409e-05	2.9707	-0.472859	5A8	0.586351	1.12835	0	5A8	0.00742887	2.03386	-0.308321	5A8	0.00140113	2.63279	-0.420416	GcL	0.0452792	1.80251	0	GcL	0.0879063	1.46062	0	Mix	Cytoplasmic Membrane	PA14_67790/PA14_67830	Translation, post-translational modification, degradation	Related to phage, transposon, or plasmid
A0A0H2ZHY7	PA14_64520	PA4880			4.32971e-09	2.97045	-0.472822	5A8	8.53844e-09	2.94699	-0.469379	5A8	7.11467e-09	2.97153	-0.47298	5A8	0.916766	1.00796	0	GcL	0.889863	1.00833	0	GcL	0.96032	1.00036	0	SsoPox	Cytoplasmic		Central intermediary metabolism
A0A0H2ZC62	PA14_23920	PA3108	PurF	PurF	1.05046e-07	2.96523	-0.472059	5A8	0.000137182	2.1653	-0.335519	5A8	4.64738e-06	2.4949	-0.397054	5A8	0.0281453	1.36943	0	GcL	0.390636	1.15222	0	GcL	0.0476403	1.18852	0	Mix	Cytoplasmic	PA14_23920/PA14_23950	Amino acid biosynthesis and metabolism	Nucleotide biosynthesis and metabolism
A0A0H2ZHT6	PA14_62910	PA4756	CarB	CarB	1.62979e-06	2.96381	-0.47185	5A8	0.103575	1.38963	0	5A8	3.11727e-05	2.53379	-0.40377	5A8	0.000618647	2.1328	-0.328951	GcL	0.00661903	1.82335	0	GcL	0.0883011	1.16972	0	Mix	Cytoplasmic	PA14_62890/PA14_62930	Amino acid biosynthesis and metabolism	Nucleotide biosynthesis and metabolism
A0A0H2Z7P7	PA14_52060	PA0943			1.16283e-07	2.92593	-0.466264	5A8	4.30703e-08	3.2231	-0.508274	5A8	0.000111356	2.10552	-0.32336	5A8	0.304708	1.10157	0	Ssopox	0.0104345	1.53078	0	Mix	0.0421057	1.38964	0	Mix	Periplasmic	PA14_52040/PA14_52060	Protein secretion/export apparatus
Q02NV3	PA14_27960	PA2796	Tal	Tal	1.69594e-06	2.91373	-0.464449	5A8	0.729045	1.10056	0	GcL	0.00240077	1.9942	0	5A8	0.00695681	3.20672	-0.506062	GcL	0.0782613	2.19473	0	GcL	0.0733217	1.4611	0	Mix	Cytoplasmic		Energy metabolism
A0A0H2ZB70	PA14_34970	PA2290	Gcd	Gcd	3.33067e-16	2.83625	-0.452745	5A8	4.03477e-09	1.8787	0	5A8	1.24396e-09	2.66878	-0.426312	5A8	6.58057e-07	1.50969	0	GcL	0.000608629	1.42054	0	GcL	0.529443	1.06275	0	Mix	Cytoplasmic Membrane		Carbon compound catabolism
A0A0H2ZGH5	PA14_56370	PA4336			9.37332e-08	2.8238	-0.450834	5A8	0.000182811	1.99158	0	5A8	3.74881e-05	2.30859	-0.363346	5A8	0.0159925	1.41787	0	GcL	0.33862	1.15917	0	GcL	0.200315	1.22317	0	Mix	Cytoplasmic	PA14_56360/PA14_56370	Putative enzymes
A0A0H2ZB73	PA14_34840	PA2302		AmbE	1.03279e-09	2.77619	-0.44345	5A8	0.000313133	1.75057	0	5A8	4.01992e-08	2.44681	-0.3886	5A8	0.000991073	1.58588	0	GcL	0.015922	1.39772	0	GcL	0.0256128	1.13462	0	Mix	Cytoplasmic	PA14_34810/PA14_34850	Secreted Factors (toxins, enzymes, alginate)
A0A0H2ZEQ6	PA14_17170	PA3647	OmpH		2.76903e-05	2.72567	-0.435473	5A8	0.875099	1.03842	0	GcL	0.00210732	2.11003	-0.324288	5A8	0.00132924	2.83038	-0.451845	GcL	0.0165267	2.19109	-0.340661	GcL	0.170028	1.29177	0	Mix	Unknown	PA14_17080/PA14_17180	Cell wall / LPS / capsule	Transport of small molecules	Membrane protein
A0A0H2Z8K4	PA14_47390	PA1301			0.00909451	2.53636	-0.404211	5A8	0.869589	1.10859	0	GcL	0.0754323	1.64963	0	5A8	0.0705349	2.81177	0	GcL	0.177737	1.82876	0	GcL	0.811806	1.53753	0	Mix	Cytoplasmic Membrane	PA14_47390/PA14_47400	Two-component regulatory systems
A0A0H2Z6L4	PA14_55290	PA0698			6.59489e-05	2.49709	-0.397434	5A8	0.582732	1.22563	0	GcL	0.00883519	1.911	0	5A8	0.000432508	3.0605	-0.485792	GcL	0.0085769	2.34217	-0.369618	GcL	0.659422	1.30669	0	Mix	Unknown	PA14_55250/PA14_55380	Hypothetical, unclassified, unknown
A0A0H2ZBU9	PA14_31810	PA2532	Tpx	Tpx	2.18287e-08	2.49646	-0.397324	5A8	0.204821	1.14947	0	5A8	3.99508e-05	2.07135	-0.316253	5A8	1.23976e-07	2.17184	-0.336828	GcL	0.000259791	1.80201	0	GcL	0.180898	1.20523	0	Mix	Periplasmic		Adaptation/Protection
Q02TL9	PA14_07090	PA0546	MetK	MetK	2.35466e-07	2.45935	-0.39082	5A8	8.35636e-05	1.61738	0	5A8	0.000121152	1.96164	0	5A8	5.40403e-07	1.52058	0	GcL	0.0419924	1.21285	0	GcL	0.0975209	1.25372	0	Mix	Cytoplasmic	PA14_07090/PA14_07110	Amino acid biosynthesis and metabolism	Central intermediary metabolism	Antibiotic resistance and susceptibility
Q02GB1	PA14_60445	PA4566	ObgE	Obg	0.00509574	2.3633	-0.373519	5A8	0.00990031	2.04231	-0.310121	5A8	0.00147389	2.55418	-0.407252	5A8	0.595748	1.15717	0	GcL	0.507229	1.25064	0	GcL	0.958737	1.08077	0	SsoPox	Cytoplasmic	PA14_60410/PA14_60445	Adaptation/Protection
Q02DF0	PA14_73290	PA5558	AtpF	AtpF (UncF, PapF)	0.000346663	2.35161	-0.371366	5A8	0.933548	1.02777	0	GcL	0.00275187	2.02473	-0.306367	5A8	0.000459315	2.41692	-0.383262	GcL	0.00318414	2.08095	-0.318262	GcL	0.271865	1.16145	0	Mix	Cytoplasmic Membrane	PA14_73230/PA14_73320	Energy metabolism
A0A0H2ZGH2	PA14_09540	PA4205	MexG	MexG	1.99524e-05	2.34285	-0.369744	5A8	2.40382e-06	2.35482	-0.371958	5A8	7.18653e-06	2.4123	-0.382431	5A8	0.842397	1.00511	0	Ssopox	0.650964	1.02441	0	GcL	0.876014	1.02965	0	SsoPox	Cytoplasmic Membrane	PA14_09500/PA14_09540	Membrane proteins
A0A0H2ZIT5	PA14_72890	PA5525			2.05685e-05	2.34253	-0.369685	5A8	0.144697	1.27466	0	5A8	0.0633547	1.4038	0	5A8	0.00412893	1.83777	0	GcL	0.529427	1.10131	0	GcL	0.0568089	1.66871	0	Mix	Cytoplasmic	PA14_72880/PA14_72890	Transcriptional regulators
A0A0H2ZJN2	PA14_72840	PA5521			0.045752	2.29172	-0.360162	5A8	0.217716	1.37604	0	5A8	0.123761	2.10623	0	5A8	0.97556	1.66545	0	GcL	0.855027	1.53064	0	GcL	0.794849	1.08807	0	Mix	Cytoplasmic		Biosynthesis of cofactors, prosthetic groups and carriers
A0A0H2ZFK7	PA14_12900	PA3940			3.14593e-06	2.26205	-0.354501	5A8	0.273287	1.13031	0	GcL	0.0297403	1.43185	0	5A8	7.23076e-08	2.5568	-0.407697	GcL	0.00425866	1.61843	0	GcL	0.0213656	1.5798	0	Mix	Cytoplasmic		DNA replication, recombination, modification and repair
Q02PG5	PA14_25250	PA3001	Gap2		1.56789e-09	2.24953	-0.352091	5A8	0.164398	1.17546	0	5A8	6.11638e-07	2.09648	-0.321491	5A8	0.00149159	1.91375	0	GcL	0.00581816	1.78354	0	GcL	0.45048	1.073	0	Mix	Cytoplasmic		Carbon compound catabolism
A0A0H2Z9D9	PA14_43850	PA1596	HtpG	HtpG	2.57818e-05	2.22665	-0.347653	5A8	0.69632	1.08593	0	5A8	0.000295442	2.08227	-0.318536	5A8	8.21623e-06	2.05045	-0.31185	GcL	0.000224006	1.91749	0	GcL	0.660929	1.06934	0	Mix	Cytoplasmic	PA14_43840/PA14_43850	Chaperones & heat shock proteins
A0A0H2ZBN7	PA14_32610	PA2476	DsbG	DsbG	0.000222724	2.22237	-0.346817	5A8	0.00189536	2.00721	-0.302592	5A8	7.39207e-05	2.53424	-0.403847	5A8	0.521642	1.1072	0	GcL	0.105748	1.26257	0	GcL	0.123468	1.14033	0	SsoPox	Periplasmic	PA14_32590/PA14_32610	Chaperones & heat shock proteins	Translation, post-translational modification, degradation
A0A0H2ZIL8	PA14_68070	PA5153			0.000172569	2.19106	-0.340655	5A8	0.00091101	1.9455	0	5A8	0.000284495	2.03366	-0.308279	5A8	0.455572	1.12622	0	GcL	0.83577	1.04531	0	GcL	0.537282	1.0774	0	Mix	Periplasmic	PA14_68060/PA14_68090	Transport of small molecules
A0A0H2Z9M5	PA14_41570	PA1777	OprF	OprF	0.0157092	2.16055	-0.334564	5A8	0.326144	1.1545	0	GcL	0.015765	2.10156	-0.322541	5A8	0.000369855	2.49435	-0.396957	GcL	0.000133857	2.42625	-0.384935	GcL	0.735229	1.02807	0	Mix	Outer Membrane		Transport of small molecules
Q02T91	PA14_08720	PA4274	RplK	RplK	2.13234e-08	2.14566	-0.331561	5A8	0.151058	1.13475	0	5A8	0.000337394	1.61257	0	5A8	1.71387e-06	1.89086	0	GcL	0.00630584	1.42108	0	GcL	0.0217533	1.33058	0	Mix	Cytplasmic	PA14_08720/PA14_08730	Translation, post-translational modification, degradation
A0A0H2ZKF3	PA14_04650	PA0355	PfpI	PfpI	0.0297255	2.13166	-0.328719	5A8	0.838987	1.20047	0	5A8	0.0406077	1.98935	0	5A8	0.0125443	1.7757	0	GcL	0.00304081	1.65715	0	GcL	0.392966	1.07154	0	Mix	Cytoplasmic		Translation, post-translational modification, degradation	Motility & Attachment (PAO1)	Cell wall / LPS / capsule (PAO1)	Antibiotic resistance and susceptibility (PAO1)
A0A0H2ZCY5	PA14_25320	PA2997	NqrC	NqrC	0.00573477	2.11856	-0.32604	5A8	0.354894	2.82455	0	GcL	0.0203838	1.77953	0	5A8	0.195715	3.36267	0	GcL	0.354894	2.82455	0	GcL	0.286825	1.19051	0	Mix	Unknown	PA14_25280/PA14_25370	Energy metabolism
A0A0H2ZJ53	PA14_69230	PA5242	Ppk	Ppk	0.00551144	2.10832	-0.323937	5A8	0.0112288	1.84399	0	5A8	0.00454777	2.30654	-0.362962	5A8	0.738592	1.14335	0	GcL	0.401193	1.25084	0	GcL	0.579895	1.09402	0	SsoPox	Cytoplasmic Membrane	PA14_69230/PA14_69240	Nucleotide biosynthesis and metabolism	Adaptation, Protection
Q02ND0	PA14_30010	PA2638	NuoB	NuoB	9.73545e-05	2.09616	-0.321425	5A8	0.202123	1.2007	0	5A8	3.75283e-05	1.9205	0	5A8	0.00387695	1.74578	0	GcL	0.00531871	1.59948	0	GcL	0.334564	1.09147	0	Mix	Cytoplasmic Membrane	PA14_29850/PA14_30020	Energy metabolism
A0A0H2ZFJ6	PA14_11750	PA4026			0.00575322	2.04277	-0.31022	5A8	0.00905753	2.03516	-0.308599	5A8	0.000938971	2.18783	-0.340013	5A8	0.851627	1.00374	0	GcL	0.871475	1.07501	0	GcL	0.948745	1.07101	0	SsoPox	Cytoplasmic	PA14_11740/PA14_11750	Putative enzymes
A0A0H2ZHK5	PA14_60230	PA4545	ComL	ComL	3.95672e-12	535.198	2.72851	Ssopox	0.166631	13.5016	0	GcL	0.0113993	301.726	2.47961	Mix	1.90515e-06	39.6395	1.59813	Ssopox	0.0910434	22.3474	0	Mix	0.0307328	1.77379	0	SsoPox	Outer Membrane		Cell wall / LPS / capsule
A0A0H2ZB54	PA14_34070	PA2365	HsiB3	HsiB3	5.10795e-07	170.083	2.23066	Ssopox	0.0084624	43.4292	1.63778	GcL	0.0702978	18.1031	0	Mix	0.00735618	3.91632	0.592878	Ssopox	0.414135	2.399	0	GcL	0.00139456	9.39524	-0.972908	SsoPox	Cytoplasmic	PA14_33940/PA14_34070	Hypothetical, unclassified, unknown
Q02U62	PA14_04630	PA0353	IlvD	IlvD	3.73799e-06	74.0582	1.86957	Ssopox	0.0904969	1197.7	0	GcL	5.41961e-06	50.5103	1.70338	Mix	0.294103	16.1724	0	GcL	0.425698	23.712	0	GcL	0.422013	1.4662	0	SsoPox	Cytoplasmic		Amino acid biosynthesis and metabolism	Biosynthesis of cofactors, prosthetic groups and carriers
Q02FQ1	PA14_63090	PA4771	LldD	LldD	8.03715e-08	39.7673	1.59953	Ssopox	0.0174485	5.73235	0.758333	GcL	4.35409e-07	36.8474	1.56641	Mix	0.00012859	6.93734	0.841193	Ssopox	0.000484801	6.42798	0.808074	Mix	0.423394	1.07924	0	SsoPox	Cytoplasmic	PA14_63090/PA14_63100	Energy metabolism
Q02T64	PA14_09010	PA4247	RplR	RplR	0.000667409	12.8589	1.1092	Ssopox	0.266724	6.75278	0	GcL	0.00039855	15.7214	1.19649	Mix	0.0358509	1.90424	0	Ssopox	0.0231254	2.32814	0.367009	Mix	0.261344	1.22261	0	Mix	Cytoplasmic	PA14_08990/PA14_09070	Translation, post-translational modification, degradation
A0A0H2ZHY6	PA14_63780	PA4824			5.27151e-06	12.4255	1.09431	Ssopox	2.45513e-06	14.0634	1.14809	GcL	3.56042e-06	12.7772	1.10644	Mix	0.304642	1.13183	0	GcL	0.422081	1.10067	0	GcL	0.716938	1.02831	0	Mix	Unknown	PA14_63740/PA14_63780	Hypothetical, unclassified, unknown
A0A0H2ZHA1	PA14_65430	PA4953	MotB	MotB	0.00197507	9.64445	0.984277	Ssopox	0.451575	1.04667	0	5A8	0.0060388	9.80642	0.99151	Mix	2.14612e-05	10.0946	1.00409	Ssopox	0.000812026	10.2641	1.01132	Mix	0.474332	1.01679	0	Mix	Unknown	PA14_65430/PA14_65450	Chemotaxis	Adaptation, Protection	Membrane proteins
A0A0H2Z9D2	PA14_44300	PA1561	Aer	Aer	0.00150585	9.42665	0.974357	Ssopox	0.07624	5.25076	0	GcL	0.087166	3.36483	0	Mix	0.0227493	1.79529	0	Ssopox	0.804634	1.56048	0	GcL	0.00431534	2.80152	-0.447394	SsoPox	Cytoplasmic Membrane		Chemotaxis
A0A0H2ZEE8	PA14_13010	PA3931		NlpA	0.00332929	7.95919	0.900869	Ssopox	0.0112593	1.52659	0	GcL	0.00282314	9.2367	0.965517	Mix	4.77964e-05	21.1788	1.3259	Ssopox	4.09736e-05	24.5781	1.39055	Mix	0.791102	1.16051	0	Mix	Unknown		Hypothetical, unclassified, unknown
A0A0H2Z6F1	PA14_55480	PA0682	HxcX	HxcX	0.00123283	7.46328	0.87293	Ssopox	0.140165	2.74889	0	GcL	0.00580301	5.88132	0.769475	Mix	0.0260133	2.71502	0.433773	Ssopox	0.125745	2.13953	0	Mix	0.152492	1.26898	0	SsoPox	Cytoplasmic Membrane	PA14_55430/PA14_55490	Protein secretion/export apparatus
A0A0H2Z8G2	PA14_47490	PA1293			0.00142804	6.35187	0.802902	Ssopox	0.096356	2.71093	0	GcL	0.00186407	5.30457	0.724651	Mix	0.0180297	2.34306	0.369783	Ssopox	0.0265013	1.95674	0	Mix	0.613379	1.19743	0	SsoPox	Cytoplasmic		Putative enzymes
A0A0H2ZKW0	PA14_03350				0.000642816	5.85774	0.76773	Ssopox	6.56909e-05	13.3413	1.1252	GcL	0.0808838	4.55341	0	Mix	0.0879823	2.27755	0	GcL	0.0228341	2.92996	-0.466862	GcL	0.141943	1.28645	0	SsoPox	Cytoplasmic	PA14_03350/PA14_03360	Hypothetical, unclassified, unknown
A0A0H2ZHS2	PA14_61330	PA4635	MgtC	MgtC	0.00508521	5.81834	0.764799	Ssopox	0.0431134	2.41271	0.382505	GcL	0.0206459	4.9014	0.69032	Mix	0.00568989	2.41154	0.382295	Ssopox	0.285339	2.03149	0	Mix	0.349151	1.18708	0	SsoPox	Cytoplasmic Membrane		Transport of small molecules
A0A0H2ZIA9	PA14_66260	PA5013	IlvE	IlvE	2.57777e-05	5.56082	0.745139	Ssopox	0.0531239	3.03036	0	GcL	0.000393023	4.52888	0.65599	Mix	0.0132886	1.83504	0	Ssopox	0.0922491	1.4945	0	Mix	0.177412	1.22786	0	SsoPox	Cytoplasmic	PA14_66190/PA14_66270	Amino acid biosynthesis and metabolism
A0A0H2ZIL7	PA14_67840	PA5137			1.328e-07	5.41423	0.733537	Ssopox	6.73898e-07	5.01988	0.700694	GcL	4.14932e-07	5.76059	0.760467	Mix	0.278861	1.07856	0	Ssopox	0.321688	1.14756	0	Mix	0.745565	1.06397	0	Mix	Unknown		Transport of small molecules
A0A0H2ZDH5	PA14_22450	PA3227	PpiA	PpiA	0.000585008	5.13924	0.710899	Ssopox	0.0177538	6.62736	0.821341	GcL	0.0396514	3.91708	0.592963	Mix	0.868911	1.28956	0	GcL	0.458904	1.69191	0	GcL	0.221091	1.31201	0	SsoPox	Periplasmic	PA14_22440/PA14_22470	Translation, post-translational modification, degradation	Chaperones & heat shock proteins
A0A0H2ZCD0	PA14_29330				1.77226e-06	4.78052	0.679475	Ssopox	5.76529e-07	6.7826	0.831396	GcL	5.21823e-06	5.11859	0.70915	Mix	0.103617	1.4188	0	GcL	0.188432	1.32509	0	GcL	0.874216	1.07072	0	Mix	Unknown		Hypothetical, unclassified, unknown
Q02T69	PA14_08960	PA4252	RplX	RplX	1.72844e-06	4.5898	0.661793	Ssopox	0.043481	2.73274	0.436599	GcL	0.000345898	3.73506	0.572297	Mix	0.0480176	1.67956	0	Ssopox	0.252382	1.36678	0	Mix	0.326201	1.22884	0	SsoPox	Cytoplasmic	PA14_08990/PA14_09070	Translation, post-translational modification, degradation
A0A0H2ZCE0	PA14_29220	PA2700	OpdB	OpdB	0.0138693	4.40049	0.643501	Ssopox	0.0383014	2.69352	0.430321	GcL	0.11324	1.85173	0	Mix	0.00182606	1.63373	0	Ssopox	0.0794564	1.4546	0	GcL	0.00147534	2.37642	-0.375924	SsoPox	Outer Membrane	PA14_29210/PA14_29230	Membrane proteins
A0A0H2ZJ61	PA14_70750	PA5360	PhoB	PhoB	1.32878e-06	4.00753	0.602877	Ssopox	1.38366e-05	3.07989	0.488535	GcL	3.20723e-06	4.40991	0.64443	Mix	0.00682541	1.30119	0	Ssopox	0.0216046	1.43184	0	Mix	0.627776	1.1004	0	Mix	Cytoplasmic	PA14_70750/PA14_70770	Transcriptional regulators	Two-component regulatory systems
A0A0H2Z6R3	PA14_53730	PA0815			0.000244867	3.96593	0.598345	Ssopox	0.01372	2.43815	0.387061	GcL	4.9524e-05	5.87693	0.76915	Mix	0.0382096	1.62661	0	Ssopox	0.00325818	2.4104	0.38209	Mix	0.0677764	1.48186	0	Mix	Cytoplasmic		Transcriptional regulators
A0A0H2ZIA1	PA14_64100	PA4847	AccB	AccB	1.45415e-06	3.95028	0.596628	Ssopox	0.048089	3.03659	0.482386	GcL	9.55547e-07	4.7439	0.676135	Mix	0.108256	1.30089	0	Ssopox	0.0514949	1.56224	0	Mix	0.372029	1.2009	0	Mix	Unknown	PA14_64090/PA14_64110	Fatty acid and phospholipid metabolism
Q02E39	PA14_70280	PA5323	ArgB	ArgB	0.000946355	3.94516	0.596064	Ssopox	0.00358058	4.61705	0.664365	GcL	0.174444	1.86136	0	Mix	0.907382	1.17031	0	GcL	0.0696904	2.48048	0	GcL	0.0300186	2.11951	-0.326235	SsoPox	Cytoplasmic	PA14_70240/PA14_70280	Amino acid biosynthesis and metabolism
Q02DZ3	PA14_70860	PA5369	PstS	PstS	2.70893e-10	3.72863	0.571549	Ssopox	1.95842e-09	2.70767	0.432595	GcL	5.97023e-08	4.08643	0.611344	Mix	0.0019842	1.37706	0	Ssopox	0.0138429	1.50921	0	Mix	0.695144	1.09596	0	Mix	Cytoplasmic Membrane		Transport of small molecules
Q02U51	PA14_04760	PA0363	CoaD	CoaD	2.95726e-06	3.68475	0.566408	Ssopox	0.00586326	1.90389	0	GcL	3.99427e-06	4.83176	0.684106	Mix	0.00168134	1.93538	0	Ssopox	0.000789552	2.53784	0.404464	Mix	0.274711	1.31129	0	Mix	Cytoplasmic		Central intermediary metabolism
Q02IH8	PA14_51240	PA1013	PurC	PurC	5.5946e-06	3.44172	0.536776	Ssopox	0.0190976	2.33491	0.36827	GcL	1.60247e-05	3.401	0.531607	Mix	0.034021	1.47403	0	Ssopox	0.0524803	1.45659	0	Mix	0.7787	1.01197	0	SsoPox	Cytoplasmic	PA14_51240/PA14_51270	Nucleotide biosynthesis and metabolism
Q02FU3	PA14_62580	PA4729	PanB	PanB	0.0228326	3.26292	0.513606	Ssopox	0.0164627	6.83952	0.835026	GcL	0.0865478	2.49759	0	Mix	0.439336	2.09614	0	GcL	0.122088	2.73845	0	GcL	0.191976	1.30643	0	SsoPox	Cytoplasmic	PA14_62580/PA14_62590	Biosynthesis of cofactors, prosthetic groups and carriers
A0A0H2ZH03	PA14_63800	PA4825	MgtA		2.07442e-06	3.23753	0.510214	Ssopox	7.59929e-06	2.16529	0.335516	GcL	2.24612e-05	3.13781	0.496626	Mix	0.0492704	1.4952	0	Ssopox	0.130245	1.44914	0	Mix	0.779659	1.03178	0	SsoPox	Cytoplasmic Membrane		Transport of small molecules
A0A0H2Z9S4	PA14_41950	PA1748			0.00013469	3.22194	0.508118	Ssopox	0.000831553	2.83024	0.451823	GcL	9.02666e-05	3.62597	0.559424	Mix	0.235388	1.1384	0	Ssopox	0.0923035	1.28115	0	Mix	0.360975	1.1254	0	Mix	Cytoplasmic		Fatty acid and phospholipid metabolism	Putative enzymes
A0A0H2ZIV9	PA14_69240	PA5243	HemB	HemB	0.00874441	3.18661	0.503329	Ssopox	0.057164	2.43971	0	GcL	0.0150197	2.67438	0.427223	Mix	0.37325	1.30614	0	Ssopox	0.558638	1.09619	0	Mix	0.726375	1.19153	0	SsoPox	Cytoplasmic	PA14_69230/PA14_69240	Biosynthesis of cofactors, prosthetic groups and carriers
A0A0H2Z6U8	PA14_54180	PA0781			0.000464477	3.15177	0.498555	Ssopox	5.71197e-06	7.592	0.880356	GcL	0.000734138	3.17851	0.502223	Mix	0.000156999	2.4088	-0.381801	GcL	0.000395263	2.38854	-0.378133	GcL	0.910687	1.00848	0	Mix	Outer Membrane		Hypothetical, unclassified, unknown
A0A0H2ZJA2	PA14_71720	PA5435	OadA	PycB	2.45015e-06	3.08455	0.489191	Ssopox	1.57909e-07	5.08542	0.706327	GcL	2.35069e-07	3.53187	0.548005	Mix	0.0201062	1.64868	0	GcL	0.0747952	1.43987	0	GcL	0.375633	1.14502	0	Mix	Cytoplasmic	PA14_71720/PA14_71740	Central intermediary metabolism
A0A0H2ZCJ8	PA14_28460				1.78447e-07	3.06372	0.486249	Ssopox	0.219045	1.60655	0	GcL	1.82781e-08	5.00042	0.699007	Mix	0.00482659	1.90702	0	Ssopox	0.000179454	3.11252	0.493112	Mix	0.000517636	1.63214	0	Mix	Unknown		Hypothetical, unclassified, unknown
A0A0H2ZFN3	PA14_11270	PA4067	OprG	OprG	9.92975e-06	3.05332	0.484773	Ssopox	6.57216e-10	5.87516	0.76902	GcL	5.0439e-06	3.27507	0.51522	Mix	2.80216e-05	1.92419	0	GcL	8.40684e-05	1.79391	0	GcL	0.662934	1.07262	0	Mix	Outer Membrane		Membrane proteins
A0A0H2ZJ65	PA14_70800	PA5365	PhoU	PhoU	0.000146536	3.04129	0.483058	Ssopox	0.499966	1.33977	0	GcL	0.000341101	2.95874	0.471107	Mix	0.00312502	2.27002	0.356029	Ssopox	0.0056864	2.2084	0.344077	Mix	0.743488	1.0279	0	SsoPox	Cytoplasmic		Transcriptional regulators	Transport of small molecules	Membrane proteins
A0A0H2ZEZ4	PA14_16260	PA3723			0.00983351	2.97642	0.473694	Ssopox	0.140176	1.95627	0	GcL	0.117006	2.99949	0	Mix	0.0407021	1.52147	0	Ssopox	0.680253	1.53327	0	Mix	0.357513	1.00775	0	Mix	Cytoplasmic		Energy metabolism	Putative enzymes
A0A0H2ZD34	PA14_25670	PA2966	AcpP	AcpP	0.000115826	2.97173	0.47301	Ssopox	0.325383	2.07615	0	GcL	5.80482e-05	3.17855	0.502229	Mix	0.0675917	1.43137	0	Ssopox	0.0477017	1.53099	0	Mix	0.623126	1.06959	0	Mix	Cytoplasmic		Fatty acid and phospholipid metabolism
A0A0H2ZJX7	PA14_00670	PA0055			0.0265599	2.87874	0.459202	Ssopox	0.0600055	2.21707	0	GcL	0.0289518	2.78275	0.444474	Mix	0.212836	1.29844	0	Ssopox	0.258576	1.25515	0	Mix	0.883148	1.03449	0	SsoPox	Cytoplasmic	PA14_00660/PA14_00680	Hypothetical, unclassified, unknown
Q02S21	PA14_14040	PA3861	RhlB (Rhl)	RhlB (Rhl)	0.00137317	2.86921	0.457762	Ssopox	0.000212863	3.46731	0.539992	GcL	0.252961	1.60208	0	Mix	0.0861939	1.20845	0	GcL	0.00281961	2.16426	-0.335309	GcL	0.0197788	1.79093	0	SsoPox	Cytoplasmic		Transcription, RNA processing and degradation
A0A0H2ZCT2	PA14_27360	PA2841			0.0122348	2.83728	0.452902	Ssopox	0.0527731	1.38046	0	GcL	0.0117451	2.7565	0.440358	Mix	0.00337208	2.05531	0.312878	Ssopox	0.000920977	1.9968	0	Mix	0.992596	1.0293	0	SsoPox	Cytoplasmic		Fatty acid and phospholipid metabolism	Putative enzymes
A0A0H2ZH69	PA14_64840	PA4907			1.97544e-06	2.82011	0.450266	Ssopox	0.437965	1.60828	0	GcL	0.000623001	2.64867	0.423027	Mix	0.01272	1.7535	0	Ssopox	0.0578691	1.6469	0	Mix	0.461379	1.06473	0	SsoPox	Cytoplasmic	PA14_64820/PA14_64840	Putative enzymes
A0A0H2ZH13	PA14_57930	PA4461		LptB	5.8725e-05	2.76727	0.442052	Ssopox	0.00220267	2.02755	0.306972	GcL	0.000819308	3.10662	0.492287	Mix	0.0236294	1.36483	0	Ssopox	0.136294	1.5322	0	Mix	0.911718	1.12263	0	Mix	Cytoplasmic	PA14_57890/PA14_57930	Transport of small molecules
A0A0H2ZEC9	PA14_13290	PA3913		(YhbU)	0.0148532	2.74319	0.438256	Ssopox	0.751523	1.32849	0	5A8	0.00555853	4.14952	0.617998	Mix	0.0094245	3.6443	0.561615	Ssopox	0.00378593	5.5126	0.741356	Mix	0.00126885	1.51266	0	Mix	Cytoplasmic	PA14_13290/PA14_13320	Translation, post-translational modification, degradation
Q02T54	PA14_09130	PA4237	RplQ	RplQ	0.00106479	2.5172	0.400917	Ssopox	0.180171	2.1439	0	GcL	0.00361336	2.0836	0.318815	Mix	0.170965	1.17412	0	Ssopox	0.355559	1.02894	0	GcL	0.228438	1.2081	0	SsoPox	Cytoplasmic	PA14_09080/PA14_09130	Translation, post-translational modification, degradation
Q02P14	PA14_27210	PA2851	Efp	Efp	0.0003092	2.48273	0.394929	Ssopox	0.0543538	1.95302	0	GcL	6.8347e-05	2.71123	0.433166	Mix	0.141812	1.27123	0	Ssopox	0.0593244	1.38823	0	Mix	0.460062	1.09204	0	Mix	Cytoplasmic		Translation, post-translational modification, degradation
Q02T78	PA14_08870	PA4261	RplW	RplW	0.000404798	2.38091	0.376744	Ssopox	0.583526	1.59013	0	GcL	0.00211809	2.14374	0.331172	Mix	0.0519596	1.49731	0	Ssopox	0.106369	1.34816	0	Mix	0.415524	1.11064	0	SsoPox	Cytoplasmic	PA14_08850/PA14_08880	Translation, post-translational modification, degradation
Q02T63	PA14_09020	PA4246	RpsE	RpsE	0.00118023	2.35223	0.37148	Ssopox	0.181798	1.80803	0	GcL	0.00167014	2.23811	0.34988	Mix	0.10156	1.30099	0	Ssopox	0.132919	1.23787	0	Mix	0.634415	1.05099	0	SsoPox	Cytoplasmic	PA14_08990/PA14_09070	Translation, post-translational modification, degradation
A0A0H2Z804	PA14_44360	PA1555	CcoP	CcoP2	4.57203e-05	2.33097	0.367537	Ssopox	0.000260079	1.89868	0	GcL	0.00202277	2.24956	0.352097	Mix	0.241515	1.22768	0	Ssopox	0.634429	1.1848	0	Mix	0.666414	1.03619	0	SsoPox	Unknown		Energy metabolism
Q02T75	PA14_08900	PA4258	RplV	RplV	0.00355875	2.31795	0.365105	Ssopox	0.479994	1.00219	0	GcL	0.192811	1.72793	0	Mix	0.00598773	2.3129	0.364156	Ssopox	0.100384	1.72416	0	Mix	0.202731	1.34146	0	SsoPox	Cytoplasmic	PA14_08890/PA14_08980	Translation, post-translational modification, degradation
A0A0H2ZE93	PA14_20140	PA3397	Fpr	FprA (Fpr)	0.023061	2.31504	0.364559	Ssopox	0.104121	1.59535	0	GcL	0.00368544	3.41562	0.533469	Mix	0.0727148	1.45112	0	Ssopox	0.000292865	2.14098	0.330613	Mix	0.0128427	1.4754	0	Mix	Cytoplasmic		Energy metabolism	Biosynthesis of cofactors, prosthetic groups and carriers
A0A0H2ZK40	PA14_01170	PA0096			0.00258245	2.27345	0.356686	Ssopox	0.128918	1.2968	0	5A8	0.0196251	2.94197	0.468639	Mix	0.0246478	2.94822	0.46956	Ssopox	0.026712	3.81516	0.581513	Mix	0.911254	1.29406	0	Mix	Unknown	PA14_01160/PA14_01230	Hypothetical, unclassified, unknown
A0A0H2ZET1	PA14_16090	PA3735	ThrC	ThrC	0.0105488	2.21377	0.345132	Ssopox	0.384717	1.24717	0	GcL	0.00468927	2.11079	0.324444	Mix	0.0244374	1.77504	0	Ssopox	0.00739273	1.69247	0	Mix	0.922609	1.04879	0	SsoPox	Cytoplasmic	PA14_16070/PA14_16090	Amino acid biosynthesis and metabolism	Biosynthesis of cofactors, prosthetic groups and carriers
A0A0H2Z9K9	PA14_40780	PA1837			0.00339215	2.21076	0.344541	Ssopox	0.00690969	5.67276	0.753794	GcL	0.00270242	2.99182	0.475935	Mix	0.183724	2.56598	0	GcL	0.394582	1.89609	0	GcL	0.369644	1.3533	0	Mix	Cytoplasmic	PA14_40770/PA14_40780	Hypothetical, unclassified, unknown
A0A0H2ZHV4	PA14_61770	PA4670	Prs	Prs	0.000388883	2.18107	0.33867	Ssopox	0.000727852	2.30271	0.36224	GcL	0.00244152	1.85279	0	Mix	0.829115	1.05577	0	GcL	0.122033	1.24284	0	GcL	0.0434227	1.17718	0	SsoPox	Cytoplasmic	PA14_61720/PA14_61770	Carbon compound catabolism	Nucleotide biosynthesis and metabolism
A0A0H2ZJM2	PA14_71630	PA5427	AdhA	AdhA	1.28794e-07	2.18073	0.338601	Ssopox	1.30308e-09	2.53909	0.404678	GcL	2.22841e-07	2.25109	0.352392	Mix	0.0159075	1.16433	0	GcL	0.0699421	1.12794	0	GcL	0.734544	1.03227	0	Mix	Cytoplasmic		Carbon compound catabolism
A0A0H2ZE94	PA14_18690	PA3529		TsaA	0.00131365	2.13874	0.330158	Ssopox	0.000164306	2.59699	0.414471	GcL	0.0211487	1.53778	0	Mix	0.0372587	1.21426	0	GcL	7.2983e-06	1.68879	0	GcL	0.00419142	1.39079	0	SsoPox	Cytoplasmic		Adaptation/Protection	Translation, post-translational modification, degradation	Putative enzymes
A0A0H2ZIM7	PA14_68200	PA5163	RmlA	RmlA	0.0181449	2.07705	0.317446	Ssopox	1.31646e-06	9.46135	0.975953	GcL	0.23259	2.11144	0	Mix	9.32231e-06	4.5552	-0.658507	GcL	0.000146842	4.481	-0.651375	GcL	0.408915	1.01656	0	Mix	Cytoplasmic	PA14_68170/PA14_68210	Cell wall / LPS / capsule
Q02T71	PA14_08940	PA4254	RpsQ	RpsQ	0.00183704	2.0666	0.315256	Ssopox	0.158753	1.57731	0	GcL	0.00467602	1.98247	0	Mix	0.104966	1.31021	0	Ssopox	0.183969	1.25687	0	Mix	0.670116	1.04244	0	SsoPox	Cytoplasmic	PA14_08890/PA14_08980	Translation, post-translational modification, degradation
A0A0H2ZL28	PA14_05320	PA0408	PilG	PilG	0.00252367	2.02766	0.306995	Ssopox	0.440078	1.34687	0	5A8	0.0148433	2.09878	0.321967	Mix	5.52109e-05	2.731	0.436321	Ssopox	0.00118226	2.82678	0.451293	Mix	0.754812	1.03507	0	Mix	Cytoplasmic	PA14_05320/PA14_05340	Motility & Attachment	Two-component regulatory systems		Chemotaxis
Q02RC5	PA14_17100	PA3653	Frr	Frr	0.000277093	2.01844	0.305016	Ssopox	0.149471	1.45877	0	GcL	5.6656e-05	2.18856	0.340159	Mix	0.0612774	1.38366	0	Ssopox	0.0237093	1.50028	0	Mix	0.538525	1.08428	0	Mix	Cytoplasmic	PA14_17080/PA14_17180	Translation, post-translational modification, degradation
A0A0H2ZDZ5	PA14_21120	PA3318			0.13624	1.84786	0	Ssopox	0.0384677	6.25825	-0.796453	5A8	0.632608	2.02026	0	Mix	0.00247658	11.5644	1.06312	Ssopox	0.0443616	12.6433	1.10186	Mix	0.593844	1.0933	0	Mix	Unknown		Hypothetical, unclassified, unknown
A0A0H2ZHA3	PA14_59990				0.774472	1.03587	0	Ssopox	0.00019154	5.61048	-0.749	5A8	0.10282	1.95597	0	Mix	5.77736e-05	5.81174	0.764306	Ssopox	1.32598e-05	10.9739	1.04036	Mix	0.142075	1.88823	0	Mix	Unknown	PA14_59980/PA14_60020	Hypothetical, unclassified, unknown
A0A0H2ZC07	PA14_30200	PA2622	CspD	CspD	0.0584779	3.28239	0	5A8	0.0130394	4.80866	-0.682024	5A8	0.00850646	5.31737	-0.725697	5A8	0.64007	1.46499	0	Ssopox	0.674657	1.10579	0	GcL	0.46624	1.61997	0	SsoPox	Cytoplasmic		Transcriptional regulators	Adaptation, Protection
A0A0H2Z7G5	PA14_53430	PA0837	SlyD	SlyD	0.149753	1.76726	0	5A8	0.022649	2.8743	-0.458532	5A8	0.676561	1.3019	0	5A8	0.0824605	1.62642	0	Ssopox	0.0198876	2.20777	0.343954	Mix	0.0781893	1.35744	0	Mix	Cytoplasmic		Translation, post-translational modification, degradation	Chaperones & heat shock proteins
A0A0H2ZJJ4	PA14_71150	PA5387		CdhC	0.138566	1.3698	0	5A8	0.00164096	2.84496	-0.454076	5A8	0.0705624	1.54562	0	5A8	0.00893469	2.07692	0.31742	Ssopox	0.0514177	1.84066	0	Mix	0.435166	1.12836	0	SsoPox	Cytoplasmic	PA14_71110/PA14_71150	Carbon compound catabolism
Q02TY0	PA14_05620	PA0432	AhcY (SahH)	SahH (AhcY)	9.83943e-05	1.72303	0	5A8	3.33365e-07	2.24374	-0.350972	5A8	0.0670148	1.30044	0	5A8	0.00271262	1.3022	0	Ssopox	0.00382601	1.72537	0	Mix	0.14634	1.32496	0	Mix	Cytoplasmic	PA14_05590/PA14_05620	Amino acid biosynthesis and metabolism	Central intermediary metabolism
A0A0H2Z8F8	PA14_47540	PA1288	OmpP1		0.00788599	1.92258	0	5A8	0.00610077	2.16453	-0.335363	5A8	0.10972	1.49852	0	5A8	0.321944	1.12585	0	Ssopox	0.0302187	1.44444	0	Mix	0.0360103	1.28298	0	Mix	Outer Membrane		Membrane proteins
A0A0H2Z6F6	PA14_51380	PA1000	PqsE	PqsE	0.441902	2.45662	0	5A8	1.05185e-05	17.0338	1.23131	GcL	0.390498	1.94208	0	5A8	6.42998e-11	41.8455	-1.62165	GcL	1.32669e-06	33.0809	-1.51958	GcL	0.672717	1.26495	0	Mix	Cytoplasmic	PA14_51380/PA14_51430	Biosynthesis of cofactors, prosthetic groups and carriers
A0A0H2ZIH0	PA14_71600	PA5425	PurK	PurK	0.0642526	2.30299	0	Ssopox	0.0315046	3.57699	0.553518	GcL	0.134734	1.49749	0	Mix	0.0040274	1.5532	0	GcL	8.29555e-06	2.38866	-0.378154	GcL	1.80486e-05	1.5379	0	SsoPox	Cytoplasmic Membrane	PA14_71600/PA14_71620	Nucleotide biosynthesis and metabolism
Q02SE5	PA14_12390	PA3977	HemL	HemL	0.0741771	1.94866	0	Ssopox	0.039047	3.07818	0.488293	GcL	0.514454	1.09158	0	Mix	0.210413	1.57964	0	GcL	0.0167443	2.81992	-0.450236	GcL	0.0449336	1.78517	0	SsoPox	Cytoplasmic	PA14_12390/PA14_12410	Biosynthesis of cofactors, prosthetic groups and carriers
A0A0H2ZG04	PA14_11320	PA4063			0.290557	1.14971	0	Ssopox	2.8465e-06	2.99961	0.477066	GcL	0.000349689	1.62645	0	Mix	1.38491e-05	2.60902	-0.416477	GcL	0.000571907	1.84428	0	GcL	0.00470137	1.41466	0	Mix	Unknown	PA14_11280/PA14_11320	Hypothetical, unclassified, unknown
A0A0H2Z863	PA14_49200	PA1178	OprH	OprH	0.862289	1.00601	0	5A8	8.31382e-07	2.90746	0.463514	GcL	0.252281	1.10347	0	Mix	2.36562e-06	2.92494	-0.466117	GcL	1.42591e-06	2.63483	-0.420753	GcL	0.262468	1.11011	0	Mix	Outer Membrane	PA14_49170/PA14_49200	Adaptation, Protection	Transport of small molecules	Membrane proteins
A0A0H2ZEJ4	PA14_19140	PA3475	PheC	PheC	0.912705	1.11499	0	5A8	0.000377555	2.79239	0.445976	GcL	0.4468	1.47903	0	Mix	3.71309e-08	3.1135	-0.493248	GcL	0.00446952	1.88798	0	GcL	0.376049	1.64911	0	Mix	Periplasmic		Amino acid biosynthesis and metabolism
A0A0H2ZIP3	PA14_68330	PA5171	ArcA	ArcA	4.14833e-06	1.79285	0	Ssopox	2.95298e-07	2.74462	0.438482	GcL	1.07826e-06	2.04466	0.310622	Mix	0.00148889	1.53087	0	GcL	0.0221947	1.34233	0	GcL	0.133427	1.14046	0	Mix	Cytoplasmic	PA14_68300/PA14_68350	Amino acid biosynthesis and metabolism
A0A0H2ZLE4	PA14_06000	PA0459	ClpA	ClpC	8.10578e-05	1.39354	0	Ssopox	4.58384e-11	2.73785	0.43741	GcL	0.000527053	1.55671	0	Mix	1.80196e-08	1.96467	0	GcL	2.19893e-05	1.75874	0	GcL	0.35707	1.11709	0	Mix	Cytoplasmic		Translation, post-translational modification, degradation
Q02EA3	PA14_69450	PA5260	HemC	HemC (PopE)	0.0926888	1.99208	0	Ssopox	0.0275202	2.68164	0.428401	GcL	0.0199672	2.96047	0.471361	Mix	0.238442	1.34615	0	GcL	0.590523	1.10398	0	Mix	0.12779	1.48612	0	Mix	Cytoplasmic	PA14_69420/PA14_69450	Biosynthesis of cofactors, prosthetic groups and carriers	Central intermediary metabolism
A0A0H2Z7A2	PA14_47420	PA1298			0.0324707	1.62638	0	Ssopox	0.00116318	2.56147	0.408489	GcL	0.0847243	1.46117	0	Mix	0.00518273	1.57495	0	GcL	0.00191872	1.75303	0	GcL	0.41595	1.11307	0	SsoPox	Cytoplasmic	PA14_47410/PA14_47420	Hypothetical, unclassified, unknown
Q02RW1	PA14_14820	PA3807	NdK	NdK	0.357634	1.13144	0	Ssopox	5.56892e-08	2.47247	0.39313	GcL	0.0101494	1.23823	0	Mix	5.41276e-06	2.18523	-0.339498	GcL	5.89326e-07	1.99677	0	GcL	0.283914	1.09438	0	Mix	Extracellular	PA14_14820/PA14_14930	Nucleotide biosynthesis and metabolism
A0A0H2ZE84	PA14_20270	PA3387	RhlG	RhlG	0.00423923	1.8349	0	Ssopox	0.000378654	2.43451	0.386412	GcL	0.069431	1.37197	0	Mix	0.00205728	1.32678	0	GcL	1.49129e-05	1.77446	0	GcL	0.00275994	1.33742	0	SsoPox	Cytoplasmic	PA14_20260/PA14_20270	Fatty acid and phospholipid metabolism	Cell wall / LPS / capsule
A0A0H2ZAW8	PA14_30230	PA2620	ClpA	ClpA	8.10578e-05	1.39354	0	Ssopox	9.90688e-06	2.39408	0.379138	GcL	0.0011539	1.77104	0	Mix	0.000390397	1.74702	0	GcL	0.0505806	1.35179	0	GcL	0.0895638	1.29238	0	Mix	Cytoplasmic	PA14_30210/PA14_30230	Translation, post-translational modification, degradation
Q02GZ2	PA14_57800	PA4449	HisG	HisG	0.0147612	1.39925	0	Ssopox	1.61645e-05	2.30568	0.362799	GcL	0.000623517	1.95815	0	Mix	6.79878e-05	1.6478	0	GcL	0.146304	1.17748	0	GcL	0.0192869	1.39943	0	Mix	Cytoplasmic	PA14_57800/PA14_57820	Amino acid biosynthesis and metabolism
A0A0H2Z8U8	PA14_45590	PA1458	CheA	CheA	1.00941e-06	1.53869	0	Ssopox	6.06551e-11	2.26972	0.355972	GcL	9.85154e-05	1.51666	0	Mix	6.88141e-09	1.4751	0	GcL	1.2654e-05	1.49652	0	GcL	0.715477	1.01452	0	SsoPox	Cytoplasmic	PA14_45520/PA14_45590	Two-component regulatory systems
A0A0H2ZIN7	PA14_68350	PA5173	ArcC	ArcC	0.0941654	1.16496	0	Ssopox	4.38983e-07	2.26847	0.355733	GcL	0.0184536	1.51744	0	Mix	3.43945e-07	1.94724	0	GcL	0.00482823	1.49493	0	GcL	0.117604	1.30257	0	Mix	Cytoplasmic	PA14_68300/PA14_68350	Amino acid biosynthesis and metabolism
Q02GA9	PA14_60460	PA4568	RplU	RplU	0.00569885	1.82256	0	Ssopox	0.00147289	2.26374	0.354826	GcL	0.00839361	1.6758	0	Mix	0.163666	1.24206	0	GcL	0.0415222	1.35084	0	GcL	0.465113	1.08758	0	SsoPox	Cytoplasmic	PA14_60450/PA14_60460	Translation, post-translational modification, degradation
A0A0H2ZGH1	PA14_61300	PA4633			0.00148572	1.68386	0	Ssopox	0.00124323	2.25687	0.353507	GcL	0.000466259	1.89113	0	Mix	0.14444	1.3403	0	GcL	0.446778	1.1934	0	GcL	0.145045	1.12309	0	Mix	Cytoplasmic Membrane		Chemotaxis
A0A0H2ZGK0	PA14_56590	PA4352		UspN	3.18045e-05	1.65913	0	Ssopox	8.34423e-09	2.24999	0.352181	GcL	0.000258758	1.94138	0	Mix	8.11842e-05	1.35613	0	GcL	0.114719	1.15897	0	GcL	0.348352	1.17012	0	Mix	Cytoplasmic		Adaptation, Protection
A0A0H2ZGP4	PA14_57570	PA4431		PetA	1.90262e-08	1.88498	0	Ssopox	3.85386e-08	2.23947	0.350145	GcL	1.54377e-07	2.22269	0.346879	Mix	0.0300176	1.18806	0	GcL	0.894422	1.00755	0	GcL	0.0661351	1.17916	0	Mix	Cytoplasmic Membrane	PA14_57520/PA14_57570	Putative enzymes
A0A0H2ZHU3	PA14_63030	PA4765	OmlA (BamE)	OmlA	0.0732607	1.31708	0	Ssopox	0.00195652	2.21636	0.345641	GcL	0.371392	1.09105	0	Mix	0.0149206	1.68279	0	GcL	0.00130357	2.0314	-0.307796	GcL	0.113113	1.20717	0	SsoPox	Outer Membrane		Cell wall / LPS / capsule	Transport of small molecules	Membrane proteins
A0A0H2ZJ52	PA14_70600	PA5348	HupA		0.00753092	1.86557	0	Ssopox	0.00591681	2.21131	0.34465	GcL	0.214454	1.222	0	Mix	0.510704	1.18533	0	GcL	0.0110313	1.80958	0	GcL	0.0100647	1.52665	0	SsoPox	Cytoplasmic		DNA replication, recombination, modification and repair
A0A0H2ZIR8	PA14_67050	PA5076			0.681944	1.10833	0	5A8	0.00358068	2.19802	0.342032	GcL	0.261627	1.38995	0	Mix	0.00061321	2.43613	-0.386701	GcL	0.0738386	1.58137	0	GcL	0.120885	1.54052	0	Mix	Periplasmic	PA14_67030/PA14_67050	Transport of small molecules
A0A0H2Z7G7	PA14_51880	PA0958	OprD	OprD	0.37697	1.09918	0	Ssopox	1.91586e-05	2.16668	0.335795	GcL	0.143593	1.23734	0	Mix	3.59043e-05	1.9254	0	GcL	2.64177e-05	1.75108	0	GcL	0.435349	1.09955	0	Mix	Outer Membrane		Transport of small molecules
A0A0H2Z9V8	PA14_41440	PA1789	UspA	UspL	0.000183215	1.59452	0	Ssopox	2.6559e-07	2.15883	0.334219	GcL	0.00067546	1.71306	0	Mix	0.000425946	1.35391	0	GcL	0.0233824	1.26022	0	GcL	0.64929	1.07434	0	Mix	Cytoplasmic		Adaptation, Protection
Q02KR3	PA14_41640	PA1772		RraA	0.364294	1.08991	0	Ssopox	0.000358947	2.14413	0.331252	GcL	0.229964	1.1889	0	Mix	0.000245581	1.96726	0	GcL	0.0020266	1.80345	0	GcL	0.573262	1.09083	0	Mix	Cytoplasmic		Biosynthesis of cofactors, prosthetic groups and carriers
A0A0H2Z6H5	PA14_55090				0.33013	1.14044	0	Ssopox	0.0298655	2.13313	0.329016	GcL	0.0607036	1.67804	0	Mix	0.0687254	1.87043	0	GcL	0.53896	1.2712	0	GcL	0.156428	1.47139	0	Mix	Unknown		Hypothetical, unclassified, unknown
A0A0H2ZGV2	PA14_58350	PA4496	DppA1	DppA1	0.641696	1.14629	0	Ssopox	0.00695141	2.10272	0.322781	GcL	0.0128979	1.40454	0	Mix	0.0302751	1.83436	0	GcL	0.148363	1.49709	0	GcL	0.135684	1.22528	0	Mix	Periplasmic	PA14_58350/PA14_58360	Transport of small molecules
A0A0H2Z9H8	PA14_41210	PA1804	HupB	HupB	0.0183807	1.57349	0	Ssopox	0.00318795	2.09818	0.321842	GcL	0.0188538	1.62549	0	Mix	0.0644925	1.33346	0	GcL	0.112772	1.2908	0	GcL	0.871054	1.03305	0	Mix	Cytoplasmic	PA14_41200/PA14_41210	DNA replication, recombination, modification and repair
Q02DF1	PA14_73280	PA5557	AtpH	AtpH	0.00336702	1.62486	0	Ssopox	0.000330272	2.09384	0.320944	GcL	0.0198929	1.57233	0	Mix	0.012309	1.28863	0	GcL	0.0334053	1.33168	0	GcL	0.574137	1.03341	0	SsoPox	Cytoplasmic	PA14_73230/PA14_73320	Energy metabolism
A0A0H2ZDQ2	PA14_21220	PA3309	UspK		0.000109104	1.70188	0	Ssopox	4.13178e-06	2.07444	0.316902	GcL	6.2498e-05	1.90053	0	Mix	0.0138473	1.21891	0	GcL	0.289013	1.09151	0	GcL	0.267854	1.11672	0	Mix	Cytoplasmic		Hypothetical, unclassified, unknown
A0A0H2Z7I6	PA14_51530		ExoU		0.00127746	1.35815	0	5A8	4.81664e-07	2.04582	0.310866	GcL	0.57673	1.05615	0	5A8	2.65201e-11	2.77853	-0.443815	GcL	3.14084e-08	2.16068	-0.334591	GcL	0.00102198	1.28595	0	Mix	Extracellular	PA14_51520/PA14_51530	Secreted Factors (toxins, enzymes, alginate)
Q02T77	PA14_08880	PA4260	RplB	RplB	0.790988	1.1117	0	5A8	0.013549	2.03597	0.308771	GcL	0.977271	1.06791	0	5A8	0.00418194	2.26339	-0.35476	GcL	0.00514119	2.17422	-0.337304	GcL	0.755847	1.04101	0	Mix	Cytoplasmic	PA14_08850/PA14_08880	Translation, post-translational modification, degradation
A0A0H2Z7L7	PA14_51290	PA1008	Bcp	Bcp	3.63954e-06	1.7805	0	Ssopox	7.30161e-07	2.02969	0.307429	GcL	4.21877e-05	1.73708	0	Mix	0.0419333	1.13995	0	GcL	0.0530447	1.16845	0	GcL	0.643767	1.025	0	SsoPox	Cytoplasmic	PA14_51280/PA14_51290	Adaptation, Protection
A0A0H2Z823	PA14_44030	PA1583	SdhA	SdhA	0.0521329	1.25112	0	Ssopox	6.4051e-05	2.02261	0.305913	GcL	0.531848	1.1368	0	5A8	1.51882e-08	1.61664	0	GcL	2.90726e-09	2.29932	-0.361599	GcL	7.91346e-06	1.42228	0	SsoPox	Cytoplasmic Membrane	PA14_44020/PA14_44060	Energy metabolism
A0A0H2Z9C6	PA14_44070	PA1580	GltA	GltA	0.000917282	1.88053	0	5A8	0.0178989	1.53417	0	5A8	0.0013395	2.06554	-0.315033	5A8	0.249816	1.22576	0	GcL	0.108319	1.34635	0	GcL	0.416837	1.09838	0	SsoPox	Cytoplasmic		Energy metabolism
A0A0H2ZEH5	PA14_19490	PA3450	LsfA	LsfA	0.241704	1.14609	0	Ssopox	0.142879	1.23119	0	GcL	0.0245412	2.0024	-0.301552	5A8	0.104858	1.07425	0	GcL	1.30084e-08	2.46533	-0.391876	GcL	4.06674e-08	2.29494	-0.360771	SsoPox	Cytoplasmic		Adaptation, Protection
A0A0H2ZGR2	PA14_62230	PA4701			4.02073e-06	1.97587	0	5A8	0.00144286	1.51096	0	5A8	8.0909e-06	2.00135	-0.301322	5A8	0.00452278	1.30769	0	GcL	0.0064498	1.32455	0	GcL	0.811085	1.01289	0	SsoPox	Cytoplasmic		Hypothetical, unclassified, unknown
A0A0H2ZE11	PA14_20940	PA3334		Acp3	0.0863502	1.57521	0	Ssopox	0.095549	3.3699	0	GcL	0.0438458	2.72006	0.434578	Mix	0.836658	2.13933	0	GcL	0.526081	1.23891	0	GcL	0.0354221	1.72679	0	Mix	Unknown	PA14_20940/PA14_21020	Fatty acid and phospholipid metabolism
A0A0H2ZEA0	PA14_20430	PA3374	PhnM	PhnM	1.70651e-06	1.84213	0	Ssopox	0.00219049	1.63404	0	GcL	2.63011e-06	2.6623	0.425256	Mix	0.234695	1.12735	0	Ssopox	0.00747219	1.62927	0	Mix	0.0156213	1.44523	0	Mix	Cytoplasmic	PA14_20300/PA14_20450	Transport of small molecules
A0A0H2ZKV0	PA14_04150	PA0318	YcgM	HpcE	0.000468557	1.74132	0	Ssopox	0.000168766	1.91533	0	GcL	2.21809e-05	2.38204	0.376949	Mix	0.462974	1.09993	0	GcL	0.15272	1.24367	0	Mix	0.0400929	1.36795	0	Mix	Cytoplasmic	PA14_04140/PA14_04150	Central intermediary metabolism	Putative enzymes
A0A0H2ZGD4	PA14_09200	PA4232	Ssb	Ssb	4.63803e-05	1.86361	0	Ssopox	0.00603361	1.77616	0	GcL	9.43514e-06	2.21763	0.345889	Mix	0.478556	1.04923	0	Ssopox	0.0928029	1.24855	0	Mix	0.056139	1.18996	0	Mix	Cytoplasmic	PA14_09195/PA14_09200	DNA replication, recombination, modification and repair
A0A0H2ZHX0	PA14_63020	PA4764	Fur	Fur	0.000147574	1.93063	0	Ssopox	0.309019	1.42037	0	GcL	1.86321e-05	2.15113	0.332668	Mix	0.0572668	1.35925	0	Ssopox	0.0187033	1.51449	0	Mix	0.201556	1.11421	0	Mix	Cytoplasmic		Transcriptional regulators
Q02EZ9	PA14_66330	PA5018	MsrA	MsrA	0.000200012	1.89949	0	Ssopox	0.00344125	1.69033	0	GcL	6.24745e-05	2.09137	0.320432	Mix	0.16019	1.12374	0	Ssopox	0.0265785	1.23726	0	Mix	0.100983	1.10102	0	Mix	Unknown	PA14_66320/PA14_66330	Translation, post-translational modification, degradation
Q02K58	PA14_44140	PA1574	PpnP	YaiE	0.000435093	1.64312	0	Ssopox	0.239805	1.18041	0	5A8	1.87411e-05	2.02422	0.306257	Mix	0.00287757	1.93956	0	Ssopox	0.000477029	2.3894	0.37829	Mix	0.0363104	1.23193	0	Mix	Unknown		Hypothetical, unclassified, unknown
A0A0H2ZFA6	PA14_13140	PA3922			1.24559e-06	1.69382	0	Ssopox	7.96461e-07	1.939	0	GcL	3.69725e-07	2.00934	0.303054	Mix	0.0726524	1.14475	0	GcL	0.649925	1.03628	0	Mix	0.024144	1.18628	0	Mix	Unknown	PA14_13130/PA14_13140	Hypothetical, unclassified, unknown
A0A0H2ZK69	PA14_01780	PA0144			0.39018	1.01643	0	Ssopox	0.0648002	2.72696	0	5A8	0.156924	2.06978	0	5A8	4.62318e-05	2.77177	0.442757	Ssopox	0.815115	1.31751	0	Mix	0.00663156	2.10379	-0.323003	SsoPox	Unknown	PA14_01770/PA14_01780	Nucleotide biosynthesis and metabolism
A0A0H2Z982	PA14_42440	PA1709	PopD	PopD	0.0033127	1.55762	0	5A8	0.167732	2.38422	0	GcL	0.000905381	1.58971	0	5A8	0.0146945	3.71371	-0.569808	GcL	0.0126885	3.79022	-0.578664	GcL	0.961969	1.0206	0	SsoPox	Extracellular	PA14_42440/PA14_42550	Protein secretion/export apparatus
A0A0H2ZES6	PA14_16150	PA3731			0.0204404	1.29682	0	5A8	0.129668	2.18806	0	GcL	0.975962	1.01209	0	5A8	0.0247132	2.83752	-0.452938	GcL	0.121397	2.21452	0	GcL	0.00732691	1.28133	0	Mix	Cytoplasmic	PA14_16140/PA14_16150	Hypothetical, unclassified, unknown
Q02EW3	PA14_66790	PA5054	HslU	HslU	0.0141085	1.33891	0	5A8	0.0677662	2.01034	0	GcL	0.254461	1.15943	0	5A8	0.00628278	2.69166	-0.43002	GcL	0.0236704	2.33086	-0.367515	GcL	0.394058	1.15479	0	Mix	Cytoplasmic	PA14_66780/PA14_66790	Chaperones & heat shock proteins
A0A0H2Z7J4	PA14_51520		SpcU	SpcU	0.000291454	1.4187	0	5A8	0.000941751	1.89564	0	GcL	0.162582	1.16056	0	5A8	8.02904e-06	2.68934	-0.429645	GcL	0.000419375	2.2	-0.342422	GcL	0.171507	1.22243	0	Mix	Cytoplasmic	PA14_51520/PA14_51530	Chaperones & heat shock proteins
Q02H08	PA14_57580	PA4432	RpsI	RpsI	0.001497	1.91476	0	5A8	0.166185	1.31507	0	GcL	0.000871078	1.968	0	5A8	0.000248682	2.51805	-0.401064	GcL	0.0001545	2.58805	-0.412973	GcL	0.881781	1.0278	0	SsoPox	Cytoplasmic	PA14_57580/PA14_57590	Translation, post-translational modification, degradation
Q02K11	PA14_44670	PA1528	ZipA	ZipA	0.00804183	1.4948	0	5A8	3.53885e-05	1.6146	0	GcL	0.045228	1.30942	0	5A8	1.33242e-06	2.41351	-0.382649	GcL	2.52324e-06	2.11419	-0.325144	GcL	0.349868	1.14158	0	Mix	Cytoplasmic membrane		Cell division
A0A0H2ZGN7	PA14_56070	PA4315	MvaT	MvaT	0.0268421	1.39448	0	5A8	0.00113594	1.6897	0	GcL	0.594923	1.08092	0	5A8	1.24877e-06	2.35625	-0.372222	GcL	0.000392232	1.82643	0	GcL	0.0949994	1.29009	0	Mix	Cytoplasmic		Transcription regulators
Q02F74	PA14_65310	PA4944	Hfq	Hfq	0.000326642	1.51391	0	5A8	0.0112593	1.52659	0	GcL	0.000659225	1.57342	0	5A8	7.67982e-06	2.31111	-0.363821	GcL	1.38832e-05	2.40196	-0.380565	GcL	0.493916	1.03931	0	SsoPox	Cytoplasmic	PA14_65300/PA14_65310	Transcription, RNA processing and degradation	Related to phage, transposon, or plasmid
Q02H15	PA14_57500	PA4425	GmhA	YraO	0.00303961	1.7073	0	5A8	0.0812654	1.34048	0	GcL	0.0595749	1.40515	0	5A8	2.97281e-05	2.28861	-0.359572	GcL	0.00102811	1.88358	0	GcL	0.196335	1.21503	0	Mix	Cytoplasmic	PA14_57480/PA14_57510	Carbon compound catabolism	Putative enzymes
Q02T61	PA14_09040	PA4244	RplO	RplO	0.00641942	1.68958	0	5A8	0.0891858	1.33426	0	GcL	0.00396186	1.80967	0	5A8	8.18844e-05	2.25434	-0.35302	GcL	7.94628e-05	2.41457	-0.38284	GcL	0.567782	1.07108	0	SsoPox	Cytoplasmic	PA14_08990/PA14_09070	Translation, post-translational modification, degradation
Q02F80	PA14_65230	PA4938	PurA	PurA	0.000157466	1.56611	0	5A8	0.0232566	1.36175	0	GcL	0.0110476	1.39139	0	5A8	3.23212e-06	2.13265	-0.32892	GcL	0.000175902	1.89472	0	GcL	0.335944	1.12557	0	Mix	Cytoplasmic	PA14_65230/PA14_65260	Nucleotide biosynthesis and metabolism	Amino acid biosynthesis and metabolism
A0A0H2ZL24	PA14_05220	PA0399			0.057938	1.58001	0	5A8	0.17089	1.32047	0	GcL	0.356221	1.24105	0	5A8	0.00166412	2.08636	-0.319389	GcL	0.0334175	1.63877	0	GcL	0.399861	1.27312	0	Mix	Cytoplasmic	PA14_05220/PA14_05230	Amino acid biosynthesis and metabolism
A0A0H2ZDK9	PA14_23800	PA3117	AsD	AsD	0.0818571	1.26949	0	5A8	0.0034713	1.63607	0	GcL	0.400479	1.13285	0	5A8	1.61878e-05	2.07697	-0.31743	GcL	0.000586998	1.85343	0	GcL	0.443314	1.12061	0	Mix	Cytoplasmic		Amino acid biosynthesis and metabolism
A0A0H2Z7U0	PA14_49180	PA1179	PhoP	PhoP	0.00113853	1.47842	0	5A8	0.0174724	1.40167	0	GcL	0.241517	1.13852	0	5A8	3.60581e-05	2.07225	-0.316443	GcL	0.00566514	1.59582	0	GcL	0.0871559	1.29855	0	Mix	Cytoplasmic	PA14_49170/PA14_49200	Two-component regulatory systems	Transcriptional regulators
Q02T65	PA14_09000	PA4248	RplF	RplF	0.0465788	1.26102	0	5A8	0.000511919	1.59338	0	GcL	0.115601	1.24492	0	5A8	6.92047e-07	2.00929	-0.303043	GcL	9.82239e-05	1.98363	0	GcL	0.829896	1.01294	0	Mix	Cytoplasmic	PA14_08990/PA14_09070	Translation, post-translational modification, degradation
A0A0H2ZIR1	PA14_67010	PA5072		McpK	0.00143237	1.76136	0	Ssopox	0.160328	1.3804	0	5A8	0.0655586	1.56965	0	Mix	0.000936881	2.43138	0.385853	Ssopox	0.0112808	2.16675	0.335809	Mix	0.325859	1.12213	0	SsoPox	Unknown		Chemotaxis
A0A0H2Z6G9	PA14_51260	PA1011			0.447343	1.00178	0	5A8	0.106464	2.06292	0	5A8	0.0744489	1.5788	0	Mix	0.0495053	2.05926	0.31371	Ssopox	0.0198901	3.25694	0.512809	Mix	0.0468305	1.58161	0	Mix	Outer Membrane	PA14_51240/PA14_51270	Hypothetical, unclassified, unknown
A0A0H2ZKI6	PA14_03090	PA0250			0.179852	1.25731	0	Ssopox	0.029682	1.83937	0	GcL	0.590608	1.44953	0	5A8	0.0575685	1.46294	0	GcL	0.000126143	2.66621	-0.425895	GcL	0.00143293	1.8225	0	SsoPox	Unknown		Hypothetical, unclassified, unknown
Q02I31	PA14_53000	PA0871	PhhB	PhhB	0.210193	1.16846	0	Ssopox	0.126342	1.48619	0	GcL	0.436705	1.61402	0	5A8	0.459799	1.27192	0	GcL	0.00482345	2.39873	-0.379982	GcL	0.00497546	1.88592	0	SsoPox	Cytoplasmic	PA14_53010/PA14_52990	Amino acid biosynthesis and metabolism
Q02MN4	PA14_33160	PA2433			0.779425	1.7217	0	5A8	0.0515524	9.84997	0	5A8	0.984775	1.93854	0	5A8	0.071672	5.72108	0	Ssopox	0.0202415	5.08113	0.705961	Mix	0.724542	1.12595	0	SsoPox	Unknown		Hypothetical, unclassified, unknown
A0A0H2ZCG1	PA14_27710	PA2817			0.00364323	1.4913	0	Ssopox	0.244623	1.22976	0	5A8	8.60218e-05	1.95466	0	Mix	0.00220464	1.83394	0	Ssopox	0.000168503	2.40376	0.380891	Mix	0.000443421	1.31071	0	Mix	Cytoplasmic		Hypothetical, unclassified, unknown
A0A0H2ZDS6	PA14_21960	PA3250			0.00175025	1.47791	0	Ssopox	0.127744	1.18021	0	5A8	4.05296e-06	1.80274	0	Mix	5.62935e-05	1.74424	0	Ssopox	1.1498e-07	2.1276	0.32789	Mix	0.0179999	1.21978	0	Mix	Unknown	PA14_21900/PA14_21960	Transport of small molecules
